# Supplementary material for: A bi-filtering method for processing single nucleotide polymorphism array data improves the quality of genetic map and accuracy of quantitative trait locus mapping in doubled haploid populations of polyploid Brassica napus
Source: PubMed Central journal article supplement (PMC4445301; doi:10.1186/s12864-015-1559-4), 2015-05-28
Supplement: 12864_2015_1559_MOESM4_ESM.pdf [file 12864_2015_1559_MOESM4_ESM.pdf]

**Table S2 Parameters of two genetic maps constructed by the bi-filtering method (Map B) and the conventional method (Map C) in the HJ-DH population of *B. napus***

| LG              | Map B        |            |             |               |                              | Map C <sup>a</sup> |            |             |                                 |               |                              |
|-----------------|--------------|------------|-------------|---------------|------------------------------|--------------------|------------|-------------|---------------------------------|---------------|------------------------------|
|                 | Total marker | SSR marker | SNP marker  | Length (cM)   | Average distance (cM/marker) | Total marker       | SSR marker | SNP marker  | mHemi-SNP and Pseudo-simple SNP | Length (cM)   | Average distance (cM/marker) |
| <b>A1</b>       | 128          | 19         | 109         | 128.8         | 1.01                         | 129                | 19         | 110         | 6                               | 105.1         | 0.81                         |
| <b>A2</b>       | 177          | 15         | 162         | 99.2          | 0.56                         | 190                | 15         | 175         | 13                              | 144.8         | 0.76                         |
| <b>A3</b>       | 185          | 47         | 138         | 199.6         | 1.08                         | 196                | 47         | 149         | 12                              | 233.2         | 1.19                         |
| <b>A4</b>       | 47           | 10         | 37          | 58.3          | 1.24                         | 51                 | 11         | 40          | 3                               | 69.5          | 1.36                         |
| <b>A5</b>       | 73           | 16         | 57          | 63.2          | 0.87                         | 74                 | 16         | 58          | 1                               | 83.5          | 1.13                         |
| <b>A6</b>       | 74           | 16         | 58          | 66.4          | 0.90                         | 78                 | 16         | 62          | 4                               | 87.4          | 1.12                         |
| <b>A7</b>       | 171          | 33         | 138         | 128.1         | 0.75                         | 187                | 33         | 154         | 16                              | 155.9         | 0.83                         |
| <b>A8</b>       | 77           | 17         | 60          | 68.9          | 0.89                         | 81                 | 17         | 64          | 4                               | 79.9          | 0.99                         |
| <b>A9</b>       | 94           | 34         | 60          | 112.7         | 1.20                         | 97                 | 36         | 61          | 1                               | 143.9         | 1.48                         |
| <b>A10</b>      | 88           | 18         | 70          | 64.9          | 0.74                         | 93                 | 20         | 73          | 4                               | 90.3          | 0.97                         |
| <b>Subtotal</b> | <b>1114</b>  | <b>225</b> | <b>889</b>  | <b>990.1</b>  | <b>0.89</b>                  | <b>1176</b>        | <b>230</b> | <b>946</b>  | <b>64</b>                       | <b>1193.5</b> | <b>1.07</b>                  |
| <b>C1</b>       | 94           | 18         | 76          | 74.8          | 0.80                         | 117                | 18         | 99          | 18                              | 190.1         | 1.62                         |
| <b>C2</b>       | 96           | 21         | 75          | 100.1         | 1.04                         | 102                | 21         | 81          | 7                               | 127.1         | 1.25                         |
| <b>C3</b>       | 55           | 22         | 33          | 103.5         | 1.88                         | 59                 | 22         | 37          | 4                               | 110.4         | 1.87                         |
| <b>C4</b>       | 132          | 40         | 92          | 153.6         | 1.16                         | 142                | 40         | 102         | 10                              | 200.2         | 1.41                         |
| <b>C5</b>       | 136          | 27         | 109         | 145.2         | 1.07                         | 140                | 27         | 113         | 4                               | 186.9         | 1.34                         |
| <b>C6</b>       | 91           | 26         | 65          | 64.1          | 0.70                         | 99                 | 27         | 72          | 7                               | 100.7         | 1.02                         |
| <b>C7</b>       | 108          | 15         | 93          | 77            | 0.71                         | 112                | 15         | 97          | 4                               | 93.7          | 0.84                         |
| <b>C8</b>       | 121          | 32         | 89          | 144.6         | 1.20                         | 131                | 32         | 99          | 11                              | 172.3         | 1.32                         |
| <b>C9</b>       | 67           | 15         | 52          | 167.3         | 2.50                         | 37                 | 16         | 21          | 3                               | 102.5         | 2.77                         |
| <b>Subtotal</b> | <b>900</b>   | <b>216</b> | <b>684</b>  | <b>1030.2</b> | <b>1.14</b>                  | <b>939</b>         | <b>218</b> | <b>721</b>  | <b>65</b>                       | <b>1283.9</b> | <b>1.49</b>                  |
| <b>Total</b>    | <b>2014</b>  | <b>441</b> | <b>1573</b> | <b>2020.3</b> | <b>1.00</b>                  | <b>2115</b>        | <b>448</b> | <b>1667</b> | <b>132</b>                      | <b>2477.4</b> | <b>1.27</b>                  |

<sup>a</sup>The data of Map C is come from Cai *et al.* [30].
