# Supplementary material for: A bi-filtering method for processing single nucleotide polymorphism array data improves the quality of genetic map and accuracy of quantitative trait locus mapping in doubled haploid populations of polyploid Brassica napus
Source: PubMed Central journal article supplement (PMC4445301; doi:10.1186/s12864-015-1559-4), 2015-05-28
Supplement: 12864_2015_1559_MOESM5_ESM.pdf [file 12864_2015_1559_MOESM5_ESM.pdf]

**Table S3 Detailed information of the genetic linkage map of the HJ-DH population constructed by the bi-filtering analysis method (Map B), comparative analysis with *B. rapa* and *B. oleracea***

| <i>B. napus</i> |             |          | <i>B. rapa/B. oleracea</i>    |                                         |         |
|-----------------|-------------|----------|-------------------------------|-----------------------------------------|---------|
| LG              | Marker      | Position | Homologous locus              | Homologous collinear locus <sup>a</sup> |         |
| BnA01           | bnA1059     | 0        | BrA01_284970_301 <sup>b</sup> | BrA01 <sup>c</sup>                      | 284970  |
| BnA01           | bnA1060     | 0        | BrA01_316954_302              | BrA01                                   | 316954  |
| BnA01           | bnA5902     | 0.6      | BrA01_344735_301              | BrA01                                   | 344735  |
| BnA01           | bnA5487     | 2.6      | BrA01_405988_295              | BrA01                                   | 405988  |
| BnA01           | BGO001      | 4.3      | BrA01_759441_243              | BrA01                                   | 759441  |
| BnA01           | BEN334      | 4.3      | BoC01_983676_247              |                                         |         |
| BnA01           | bnA4875     | 5.7      | BrA01_806580_171              | BrA01                                   | 806580  |
| BnA01           | bnA5488     | 5.7      | BrA01_855235_301              | BrA01                                   | 855235  |
| BnA01           | bnA1065     | 6.5      | BrA01_922051_301              | BrA01                                   | 922051  |
| BnA01           | bnA5005     | 6.5      | BrA01_974796_295              | BrA01                                   | 974796  |
| BnA01           | bnA1067     | 6.5      | BrA01_975490_301              | BrA01                                   | 975490  |
| BnA01           | BEN9        | 7.6      | BrA01_1040762_198             | BrA01                                   | 1040762 |
| BnA01           | bnA1070     | 9.1      | BrA01_1103533_255             | BrA01                                   | 1103533 |
| BnA01           | bnA1073     | 11.1     | BrA01_1291584_301             | BrA01                                   | 1291584 |
| BnA01           | bnA1074     | 11.7     | BrA01_1322683_301             | BrA01                                   | 1322683 |
| BnA01           | bnA5432     | 11.7     | BoC01_1878304_252             |                                         |         |
| BnA01           | bnA1076     | 12.3     | BrA01_1439859_301             | BrA01                                   | 1439859 |
| BnA01           | bnA1093     | 12.3     | BrA01_1459501_301             | BrA01                                   | 1459501 |
| BnA01           | NIAB_SSR106 | 12.9     | BrA01_1466151_286             | BrA01                                   | 1466151 |
| BnA01           | bnA5906     | 15.8     | BoC01_2488980_301             |                                         |         |
| BnA01           | bnA1105     | 17.8     | BrA01_1977120_301             | BrA01                                   | 1977120 |
| BnA01           | bnA1106     | 17.8     | BrA01_2067347_301             | BrA01                                   | 2067347 |
| BnA01           | bnA1109     | 18.4     | BrA01_2284682_297             | BrA01                                   | 2284682 |
| BnA01           | bnA1112     | 18.7     | BrA01_2359318_213             | BrA01                                   | 2359318 |
| BnA01           | BEN10       | 19       | BrA01_2500870_113             | BrA01                                   | 2500870 |
| BnA01           | BGO108      | 19.6     | BrA01_2567859_160             | BrA01                                   | 2567859 |
| BnA01           | bnA1115     | 20.7     | BrA01_2667541_301             | BrA01                                   | 2667541 |
| BnA01           | bnA1116     | 20.7     | BrA01_2694173_301             | BrA01                                   | 2694173 |
| BnA01           | bnA1022     | 20.7     | BoC04_18829093_301            |                                         |         |
| BnA01           | bnA1117     | 20.7     | BrA01_2862804_302             | BrA01                                   | 2862804 |
| BnA01           | Ol10-D03A   | 21.6     | BrA01_3282738_133             | BrA01                                   | 3282738 |
| BnA01           | bnA1121     | 21.9     | BrA01_3304097_297             | BrA01                                   | 3304097 |
| BnA01           | bnA5499     | 21.9     | BrA09_35709086_301            |                                         |         |
| BnA01           | bnA0123     | 22.2     | BrA01_3744574_303             | BrA01                                   | 3744574 |
| BnA01           | bnA5325     | 22.2     | BoC01_4854933_314             |                                         |         |
| BnA01           | bnA1125     | 22.5     | BrA01_3969016_301             | BrA01                                   | 3969016 |
| BnA01           | bnA4825     | 22.5     | BrA01_4027253_301             | BrA01                                   | 4027253 |
| BnA01           | bnA3175     | 22.5     | BoC01_5700363_302             |                                         |         |
| BnA01           | bnA3176     | 22.5     | BoC01_5910378_284             |                                         |         |
| BnA01           | bnA5033     | 22.5     | BrA01_4077993_301             | BrA01                                   | 4077993 |
| BnA01           | bnA1129     | 22.5     | BrA01_4246436_301             | BrA01                                   | 4246436 |

|       |           |      |                          |       |          |
|-------|-----------|------|--------------------------|-------|----------|
| BnA01 | BEN2      | 22.8 | BrA01_4276372_187        | BrA01 | 4276372  |
| BnA01 | BnEMS1012 | 22.8 | BrA01_4276389_211        | BrA01 | 4276389  |
| BnA01 | bnal131   | 23.7 | BrA01_4612731_282        | BrA01 | 4612731  |
| BnA01 | bnas497   | 24.8 | BrA01_5022756_301        | BrA01 | 5022756  |
| BnA01 | bnal142   | 28.4 | BrA01_5971798_301        | BrA01 | 5971798  |
| BnA01 | bnal145   | 28.7 | BrA01_6379546_301        | BrA01 | 6379546  |
| BnA01 | bnal146   | 28.7 | BrA01_6388281_309        | BrA01 | 6388281  |
| BnA01 | bnal147   | 28.7 | BrA01_6502314_301        | BrA01 | 6502314  |
| BnA01 | bnas365   | 29   | BrA01_6681885_301        | BrA01 | 6681885  |
| BnA01 | BGR65     | 29.3 | BrA01_6684759_104        | BrA01 | 6684759  |
| BnA01 | bnal150   | 29.6 | BrA01_6898141_301        | BrA01 | 6898141  |
| BnA01 | bnas4633  | 31.6 | BrA01_7399677_301        | BrA01 | 7399677  |
| BnA01 | bnal154   | 31.6 | BrA01_7473115_301        | BrA01 | 7473115  |
| BnA01 | bnal155   | 31.6 | BrA01_7486801_301        | BrA01 | 7486801  |
| BnA01 | bnal156   | 31.6 | BrA01_7530818_301        | BrA01 | 7530818  |
| BnA01 | bnas269   | 31.6 | BrA01_7554524_301        | BrA01 | 7554524  |
| BnA01 | bnal157   | 31.6 | BrA01_7721347_301        | BrA01 | 7721347  |
| BnA01 | bnal159   | 31.9 | BrA01_7855239_303        | BrA01 | 7855239  |
| BnA01 | bnal160   | 31.9 | BrA01_7991655_302        | BrA01 | 7991655  |
| BnA01 | bnas0317  | 37.2 | BrA01_8388907_301        | BrA01 | 8388907  |
| BnA01 | bnas0318  | 37.2 | BrA01_8395801_301        | BrA01 | 8395801  |
| BnA01 | bnal168   | 41.8 | BrA01_8514979_301        | BrA01 | 8514979  |
| BnA01 | BnEMS57   | 45   | BrA01_8639083_251        | BrA01 | 8639083  |
| BnA01 | bnal181   | 46.5 | BrA01_9203246_301        | BrA01 | 9203246  |
| BnA01 | bnal174   | 51.8 | BrA01_10000380_303       | BrA01 | 10000380 |
| BnA01 | bnal880   | 55.1 | BrA01_11302933_301       | BrA01 | 11302933 |
| BnA01 | bnal202   | 57.8 | BrA01_14804405_301       | BrA01 | 14804405 |
| BnA01 | bnas5331  | 57.8 | BrA01_14915561_301       | BrA01 | 14915561 |
| BnA01 | Na12-C06  | 62.4 |                          |       |          |
| BnA01 | BGR6      | 66.3 | BrA01_14939760_138       | BrA01 | 14939760 |
| BnA01 | bnal205   | 66.9 | BrA01_14960083_301       | BrA01 | 14960083 |
| BnA01 | bnas4847  | 67.5 | BrA01_16129488_301       | BrA01 | 16129488 |
| BnA01 | bnal952   | 67.5 | BrA01_16253613_301       | BrA01 | 16253613 |
| BnA01 | bnal951   | 67.5 | BrA01_16260435_301       | BrA01 | 16260435 |
| BnA01 | bnal949   | 67.5 | BrA01_16433096_275       | BrA01 | 16433096 |
| BnA01 | bnal948   | 67.5 | BrA01_16472423_301       | BrA01 | 16472423 |
| BnA01 | bnal947   | 67.5 | BrScaffold004113_153_300 |       |          |
| BnA01 | bnas381   | 67.5 | BrA01_16945994_301       | BrA01 | 16945994 |
| BnA01 | bnas604   | 67.5 | BrA01_17112397_301       | BrA01 | 17112397 |
| BnA01 | bnal938   | 67.5 | BrA01_17296297_299       | BrA01 | 17296297 |
| BnA01 | bnal216   | 69.2 | BrA01_18097124_301       | BrA01 | 18097124 |
| BnA01 | bnas508   | 69.2 | BoC01_25604906_301       |       |          |
| BnA01 | bnal215   | 69.2 | BrA01_18102853_269       | BrA01 | 18102853 |
| BnA01 | BGR84     | 70.6 | BrA01_19723537_119       | BrA01 | 19723537 |
| BnA01 | bnas4621  | 70.9 |                          |       |          |
| BnA01 | bnal234   | 71.2 | BrA01_20436893_250       | BrA01 | 20436893 |
| BnA01 | bnal240   | 72.3 | BrA01_21533280_301       | BrA01 | 21533280 |

|       |           |       |                             |       |          |
|-------|-----------|-------|-----------------------------|-------|----------|
| BnA01 | bnA1227   | 72.9  | BrA01_21715312_301          | BrA01 | 21715312 |
| BnA01 | bnA1226   | 72.9  | BrA01_21726916_301          | BrA01 | 21726916 |
| BnA01 | bnA5240   | 73.8  | BrA01_22141137_301          | BrA01 | 22141137 |
| BnA01 | bnA1242   | 73.8  | BrA01_22680380_255          | BrA01 | 22680380 |
| BnA01 | bnA2684   | 74.1  | BrA01_23024808_206          | BrA01 | 23024808 |
| BnA01 | bnA5050   | 74.1  | BrA01_23024808_206          | BrA01 | 23024808 |
| BnA01 | bnA1244   | 74.1  | BrA01_23159955_209          | BrA01 | 23159955 |
| BnA01 | bnA5184   | 74.1  | BrA01_23169456_302          | BrA01 | 23169456 |
| BnA01 | bnA1246   | 74.1  | BrA01_23390600_301          | BrA01 | 23390600 |
| BnA01 | bnA1250   | 74.1  | BrA01_23571784_301          | BrA01 | 23571784 |
| BnA01 | BEN68     | 74.7  | BrA01_23659029_106          | BrA01 | 23659029 |
| BnA01 | bnA3349   | 75.3  | BoC01_32601699_301          |       |          |
| BnA01 | bnA5513   | 75.3  | BrA01_23718576_301          | BrA01 | 23718576 |
| BnA01 | BnGMS87   | 75.9  | BrA01_23784674_221          | BrA01 | 23784674 |
| BnA01 | bnA3358   | 76.2  | BoC01_33124503_303          |       |          |
| BnA01 | bnA1260   | 76.5  | BrA01_24487702_301          | BrA01 | 24487702 |
| BnA01 | bnA5255   | 76.5  | BrA03_2569659_301           |       |          |
| BnA01 | bnA4831   | 77.9  | BrA01_24694541_172          | BrA01 | 24694541 |
| BnA01 | bnA1269   | 77.9  | BoC01_35362787_314          |       |          |
| BnA01 | bnA0776   | 77.9  | BoC01_35286677_301          |       |          |
| BnA01 | bnA1277   | 78.5  | BrA01_26384627_301          | BrA01 | 26384627 |
| BnA01 | bnA3367   | 78.5  | BoC01_36821459_254          |       |          |
| BnA01 | bnA0344   | 78.5  | BrA01_26442983_301          | BrA01 | 26442983 |
| BnA01 | bnA1280   | 78.5  | BrA01_26605007_302          | BrA01 | 26605007 |
| BnA01 | bnA1281   | 78.5  | BrA01_26622397_301          | BrA01 | 26622397 |
| BnA01 | bnA1293   | 78.5  | BrA01_27159148_301          | BrA01 | 27159148 |
| BnA01 | bnA1295   | 78.5  | BrA01_27389556_298          | BrA01 | 27389556 |
| BnA01 | bnA5656   | 78.5  | BrScaffold000164_241494_301 |       |          |
| BnA01 | bnA1287   | 79.1  | BrA01_27855099_301          | BrA01 | 27855099 |
| BnA01 | BEN32A    | 83    | BrA01_27859602_165          | BrA01 | 27859602 |
| BnA01 | bnA0962   | 88.3  | BoScaffold000425_184083_301 |       |          |
| BnA01 | bnA0893   | 88.3  | BoScaffold000425_84667_264  |       |          |
| BnA01 | bnA0963   | 88.3  | BoScaffold000425_184083_301 |       |          |
| BnA01 | bnA2273   | 88.9  | BrA01_28153164_301          | BrA01 | 28153164 |
| BnA01 | bnA0300   | 88.9  | BrScaffold000191_156554_301 |       |          |
| BnA01 | bnA2272   | 88.9  | BrA01_28168240_301          | BrA01 | 28168240 |
| BnA01 | Na12-H02  | 90    | BrA01_28229113_223          | BrA01 | 28229113 |
| BnA01 | BRAS074B  | 90.6  | BrA01_28424481_120          | BrA01 | 28424481 |
| BnA01 | bnA5274   | 112.7 | BrA02_3965136_301           |       |          |
| BnA01 | bnA4804   | 128.8 | BrA01_4737322_301           | BrA01 | 4737322  |
| BnA02 | BoGMS795  | 0     |                             |       |          |
| BnA02 | OI11-H09A | 0.6   | BrA02_1510618_161           | BrA02 | 1510618  |
| BnA02 | sR12095   | 0.6   | BrA02_1598382_324           | BrA02 | 1598382  |
| BnA02 | BEN406    | 11.7  | BoC02_5333538_128           |       |          |
| BnA02 | bnA4819   | 15.3  | BoScaffold000328_209205_301 |       |          |
| BnA02 | bnA5528   | 15.6  | BrA02_4103904_301           | BrA02 | 4103904  |
| BnA02 | bnA1349   | 15.6  | BrA02_4120287_301           | BrA02 | 4120287  |

|       |         |      |                                |       |          |
|-------|---------|------|--------------------------------|-------|----------|
| BnA02 | bna3673 | 15.6 | BoC08_4067834_301              |       |          |
| BnA02 | bna1351 | 15.6 | BrA02_4180732_301              | BrA02 | 4180732  |
| BnA02 | bna1971 | 16.8 | BrA02_6252346_301              | BrA02 | 6252346  |
| BnA02 | bna1367 | 17.4 | BrA02_6466142_299              | BrA02 | 6466142  |
| BnA02 | sN3761B | 18.6 | BrA02_6754912_171              | BrA02 | 6754912  |
| BnA02 | bna1371 | 18.9 | BrA02_6766467_301              | BrA02 | 6766467  |
| BnA02 | bna4833 | 19.5 | BrA02_7105284_302              | BrA02 | 7105284  |
| BnA02 | sR6293  | 19.8 | BrA02_7173113_124              | BrA02 | 7173113  |
| BnA02 | bna5910 | 20.4 | BrA02_7275448_301              | BrA02 | 7275448  |
| BnA02 | bna3412 | 21.5 | BrA02_7637663_301              | BrA02 | 7637663  |
| BnA02 | bna5072 | 21.6 | BrA02_7750536_301              | BrA02 | 7750536  |
| BnA02 | bna1379 | 21.7 | BrA02_7756158_301              | BrA02 | 7756158  |
| BnA02 | bna1382 | 21.7 | BrA02_7878079_301              | BrA02 | 7878079  |
| BnA02 | bna5119 | 21.7 | BrA02_7881877_301              | BrA02 | 7881877  |
| BnA02 | bna1387 | 22   | BrA02_8179342_301              | BrA02 | 8179342  |
| BnA02 | bna5538 | 22.5 | BrA02_8447213_285              | BrA02 | 8447213  |
| BnA02 | bna1393 | 22.5 | BrA02_8625702_301              | BrA02 | 8625702  |
| BnA02 | bna1390 | 22.5 | BoC06_25238316_301             |       |          |
| BnA02 | bna0125 | 22.5 | BrA02_8738403_301              | BrA02 | 8738403  |
| BnA02 | bna1391 | 22.5 | BrScaffold000318_1244_301      |       |          |
| BnA02 | bna5442 | 22.8 | BrA02_8884562_301              | BrA02 | 8884562  |
| BnA02 | bna1398 | 22.8 | BrA02_8949807_301              | BrA02 | 8949807  |
| BnA02 | bna1401 | 22.8 | BrA02_9281581_303              | BrA02 | 9281581  |
| BnA02 | bna3513 | 23.1 | BoScaffold000001_P2_469158_301 |       |          |
| BnA02 | bna1698 | 24.3 | BrA02_9421963_300              | BrA02 | 9421963  |
| BnA02 | bna4638 | 24.3 | BrA02_9645918_301              | BrA02 | 9645918  |
| BnA02 | bna1441 | 26.5 | BrA02_10325878_301             | BrA02 | 10325878 |
| BnA02 | BEN281B | 27.4 | BrA02_10444068_202             | BrA02 | 10444068 |
| BnA02 | bna2864 | 28   | BoC01_19115033_293             |       |          |
| BnA02 | bna0362 | 28.3 | BrA02_10956748_301             | BrA02 | 10956748 |
| BnA02 | bna1447 | 28.6 | BrA02_11015035_301             | BrA02 | 11015035 |
| BnA02 | bna1445 | 29.2 | BrA02_11183543_301             | BrA02 | 11183543 |
| BnA02 | bna1404 | 29.5 | BrA02_11454601_301             | BrA02 | 11454601 |
| BnA02 | bna1406 | 29.5 | BrA02_11666536_303             | BrA02 | 11666536 |
| BnA02 | bna1407 | 29.5 | BrA02_11750590_301             | BrA02 | 11750590 |
| BnA02 | bna5073 | 30.9 | BrA02_12314392_301             | BrA02 | 12314392 |
| BnA02 | bna5852 | 30.9 | BrA02_12589154_301             | BrA02 | 12589154 |
| BnA02 | bna1418 | 31.5 | BrA02_12688756_301             | BrA02 | 12688756 |
| BnA02 | bna1420 | 31.5 | BrA02_12756742_296             | BrA02 | 12756742 |
| BnA02 | bna1424 | 33.1 | BrA02_13556242_301             | BrA02 | 13556242 |
| BnA02 | bna0786 | 33.1 | BoC02_18798720_286             |       |          |
| BnA02 | BGR87   | 33.7 | BrA02_14212023_120             | BrA02 | 14212023 |
| BnA02 | bna3297 | 51.7 | BoC07_36458580_302             | BoC07 | 36458580 |
| BnA02 | bna5839 | 51.8 | BoC07_36544565_301             | BoC07 | 36544565 |
| BnA02 | bna3294 | 51.9 | BoC07_36545063_301             | BoC07 | 36545063 |
| BnA02 | bna3292 | 52   | BoC07_36597360_301             | BoC07 | 36597360 |
| BnA02 | bna5838 | 52.1 | BoC07_36658059_301             | BoC07 | 36658059 |

|       |         |      |                                 |       |          |
|-------|---------|------|---------------------------------|-------|----------|
| BnA02 | bnA3291 | 52.2 | BoC07_36664505_301              | BoC07 | 36664505 |
| BnA02 | bnA3290 | 52.3 | BoC07_36672987_301              | BoC07 | 36672987 |
| BnA02 | bnA3289 | 52.4 | BoC07_36714679_301              | BoC07 | 36714679 |
| BnA02 | bnA5237 | 52.5 | BoC07_36755053_277              | BoC07 | 36755053 |
| BnA02 | bnA3287 | 52.5 | BoC07_36847163_301              | BoC07 | 36847163 |
| BnA02 | bnA4881 | 52.5 | BoC07_36869769_222              | BoC07 | 36869769 |
| BnA02 | bnA3286 | 52.5 | BoC07_36909176_301              | BoC07 | 36909176 |
| BnA02 | bnA3282 | 52.5 | BoC07_37335580_301              | BoC07 | 37335580 |
| BnA02 | bnA3281 | 52.5 | BoC07_37417143_299              | BoC07 | 37417143 |
| BnA02 | bnA5837 | 52.5 | BoC07_37452969_301              | BoC07 | 37452969 |
| BnA02 | bnA3280 | 52.5 | BoC07_37454319_301              | BoC07 | 37454319 |
| BnA02 | bnA3279 | 52.5 | BoC07_37488062_301              | BoC07 | 37488062 |
| BnA02 | bnA3277 | 52.5 | BoC07_37555131_301              | BoC07 | 37555131 |
| BnA02 | bnA0269 | 53.6 | BoScaffold000013_P2_1538530_301 |       |          |
| BnA02 | bnA0870 | 53.6 | BoScaffold000013_P2_1854300_287 |       |          |
| BnA02 | bnA4751 | 53.9 | BoScaffold000180_336494_302     |       |          |
| BnA02 | bnA0265 | 53.9 | BoScaffold000013_P2_2445372_302 |       |          |
| BnA02 | bnA0267 | 53.9 | BoScaffold000013_P2_2007823_301 |       |          |
| BnA02 | BGR52   | 55.3 | BrA02_17526120_144              |       |          |
| BnA02 | sR10417 | 55.3 | BrA02_17125071_227              |       |          |
| BnA02 | bnA4720 | 55.6 | BoC02_21299338_301              | BoC02 | 21299338 |
| BnA02 | bnA3533 | 56.7 | BoC05_9768588_287               |       |          |
| BnA02 | bnA3531 | 56.7 | BoC05_7783846_301               |       |          |
| BnA02 | bnA3528 | 56.7 | BoC02_22655560_300              | BoC02 | 22655560 |
| BnA02 | bnA3529 | 56.7 | BrA10_89244_100                 |       |          |
| BnA02 | bnA5824 | 57.8 | BoC01_11317620_301              |       |          |
| BnA02 | bnA3255 | 58.1 | BoC02_23357144_301              | BoC02 | 23357144 |
| BnA02 | bnA3257 | 58.4 | BoC02_23381964_301              | BoC02 | 23381964 |
| BnA02 | bnA5840 | 58.4 | BoC06_1845858_301               |       |          |
| BnA02 | bnA3263 | 58.4 | BrA05_8520929_145               |       |          |
| BnA02 | bnA3256 | 58.4 | BoC03_32323085_302              |       |          |
| BnA02 | bnA3284 | 58.7 | BoC09_27155188_301              |       |          |
| BnA02 | bnA0858 | 59   | BoScaffold000393_56192_294      |       |          |
| BnA02 | bnA3298 | 59.3 | BoC06_1908498_229               |       |          |
| BnA02 | bnA1031 | 59.3 | BoScaffold000512_57088_141      |       |          |
| BnA02 | bnA3444 | 59.6 | BoC02_25162106_301              | BoC02 | 25162106 |
| BnA02 | bnA3266 | 59.9 | BoScaffold000335_300181_301     |       |          |
| BnA02 | bnA3272 | 59.9 | BoScaffold000335_100012_301     |       |          |
| BnA02 | bnA3438 | 59.9 | BoC02_25050175_278              | BoC02 | 25050175 |
| BnA02 | bnA3461 | 59.9 | BoC06_14216429_301              |       |          |
| BnA02 | bnA5859 | 59.9 | BoScaffold000003_P1_338520_297  |       |          |
| BnA02 | bnA3453 | 60.2 | BoC07_25305432_301              |       |          |
| BnA02 | bnA0612 | 60.5 | BoScaffold000233_755201_170     |       |          |
| BnA02 | bnA3258 | 60.5 | BoC02_23426511_301              | BoC02 | 23426511 |
| BnA02 | bnA3269 | 60.5 | BoScaffold000335_230394_301     |       |          |
| BnA02 | bnA4130 | 60.6 | BoC08_9033619_300               |       |          |
| BnA02 | bnA5858 | 60.7 | BrA03_21378186_130              |       |          |

|       |         |      |                                |       |          |
|-------|---------|------|--------------------------------|-------|----------|
| BnA02 | bnA3470 | 60.7 | BoC03_41885114_301             |       |          |
| BnA02 | bnA3443 | 60.7 | BoC02_25146228_302             | BoC02 | 25146228 |
| BnA02 | bnA4704 | 60.7 | BoScaffold000419_82799_291     |       |          |
| BnA02 | bnA3492 | 60.7 | BoC08_13180288_301             |       |          |
| BnA02 | bnA3449 | 60.8 | BoC02_25222313_294             | BoC02 | 25222313 |
| BnA02 | bnA3446 | 60.9 | BoC02_25244717_155             | BoC02 | 25244717 |
| BnA02 | bnA3450 | 60.9 | BoC02_25309091_301             | BoC02 | 25309091 |
| BnA02 | bnA5969 | 60.9 | BoC02_25568930_301             | BoC02 | 25568930 |
| BnA02 | bnA3451 | 60.9 | BoC02_25351109_301             | BoC02 | 25351109 |
| BnA02 | bnA3452 | 60.9 | BoC02_25442729_300             | BoC02 | 25442729 |
| BnA02 | bnA3456 | 60.9 | BoC02_25719601_239             | BoC02 | 25719601 |
| BnA02 | bnA3457 | 60.9 | BoC02_25741664_301             | BoC02 | 25741664 |
| BnA02 | bnA3460 | 60.9 | BoC02_25833179_301             | BoC02 | 25833179 |
| BnA02 | bnA3462 | 60.9 | BoC02_25869796_301             | BoC02 | 25869796 |
| BnA02 | bnA3463 | 61.2 | BoC02_25884580_301             | BoC02 | 25884580 |
| BnA02 | bnA3467 | 61.2 | BoC02_26044159_301             | BoC02 | 26044159 |
| BnA02 | bnA3468 | 61.2 | BoC02_26067961_300             | BoC02 | 26067961 |
| BnA02 | bnA3267 | 61.2 | BoScaffold000335_309595_223    |       |          |
| BnA02 | bnA3474 | 61.2 | BoC02_26265513_301             | BoC02 | 26265513 |
| BnA02 | bnA3478 | 61.5 | BoC02_26377496_250             | BoC02 | 26377496 |
| BnA02 | bnA3479 | 61.8 | BoC02_26439434_295             | BoC02 | 26439434 |
| BnA02 | bnA3484 | 61.8 | BoC02_26666221_258             | BoC02 | 26666221 |
| BnA02 | bnA3485 | 61.8 | BoC02_26694404_299             | BoC02 | 26694404 |
| BnA02 | bnA3436 | 61.8 | BoScaffold000031_P1_149878_301 |       |          |
| BnA02 | bnA3487 | 61.8 | BoC02_26757922_301             | BoC02 | 26757922 |
| BnA02 | bnA3490 | 61.8 | BoC02_26900603_297             | BoC02 | 26900603 |
| BnA02 | bnA3491 | 62.1 | BoC02_26921898_264             | BoC02 | 26921898 |
| BnA02 | bnA4790 | 62.1 | BoC02_27031205_301             | BoC02 | 27031205 |
| BnA02 | bnA3493 | 62.4 | BoC02_27046229_278             | BoC02 | 27046229 |
| BnA02 | bnA3496 | 62.4 | BoC02_27104488_302             | BoC02 | 27104488 |
| BnA02 | bnA3498 | 62.7 | BoC02_27193907_301             | BoC02 | 27193907 |
| BnA02 | bnA3965 | 63   | BoC02_28292620_301             | BoC02 | 28292620 |
| BnA02 | bnA3964 | 63   | BoC02_28311847_301             | BoC02 | 28311847 |
| BnA02 | bnA3963 | 63.3 | BoC02_28352422_239             | BoC02 | 28352422 |
| BnA02 | bnA3962 | 63.6 | BoC02_28386263_301             | BoC02 | 28386263 |
| BnA02 | bnA3960 | 63.6 | BoC02_28444056_301             | BoC02 | 28444056 |
| BnA02 | bnA3959 | 63.6 | BoC02_28482686_301             | BoC02 | 28482686 |
| BnA02 | bnA3957 | 63.6 | BoC02_28752066_301             | BoC02 | 28752066 |
| BnA02 | bnA3956 | 63.6 | BoC02_28779755_301             | BoC02 | 28779755 |
| BnA02 | bnA3955 | 63.6 | BoC02_28805541_301             | BoC02 | 28805541 |
| BnA02 | bnA1021 | 63.6 | BoC02_28822177_301             | BoC02 | 28822177 |
| BnA02 | bnA3958 | 63.6 | BoC02_28569158_301             | BoC02 | 28569158 |
| BnA02 | bnA3240 | 63.6 | BoC02_29075223_301             | BoC02 | 29075223 |
| BnA02 | bnA3552 | 66.6 | BoC02_29369413_301             | BoC02 | 29369413 |
| BnA02 | bnA0519 | 66.6 | BoC07_18065200_298             |       |          |
| BnA02 | bnA0846 | 69.9 | BoC02_29637108_269             | BoC02 | 29637108 |
| BnA02 | bnA0734 | 69.9 | BoC02_29924834_311             | BoC02 | 29924834 |

|       |          |      |                                |       |          |
|-------|----------|------|--------------------------------|-------|----------|
| BnA02 | bna4706  | 69.9 | BoC02_31474599_301             | BoC02 | 31474599 |
| BnA02 | bna3549  | 69.9 | BoC07_32620548_299             |       |          |
| BnA02 | bna3551  | 69.9 | BoC02_31483657_301             | BoC02 | 31483657 |
| BnA02 | bna4705  | 69.9 | BoC02_31504241_301             | BoC02 | 31504241 |
| BnA02 | bna3548  | 69.9 | BoC02_31576602_301             | BoC02 | 31576602 |
| BnA02 | bna3546  | 70.2 | BoC02_31630315_301             | BoC02 | 31630315 |
| BnA02 | bna3544  | 70.3 | BoC02_31689351_301             | BoC02 | 31689351 |
| BnA02 | bna3541  | 70.4 | BoC02_31762247_301             | BoC02 | 31762247 |
| BnA02 | bna3539  | 70.5 | BoC02_31838722_301             | BoC02 | 31838722 |
| BnA02 | bna3536  | 70.6 | BoC02_31889051_301             | BoC02 | 31889051 |
| BnA02 | bna3535  | 70.9 | BoC02_31914762_301             | BoC02 | 31914762 |
| BnA02 | bna0621  | 71.2 | BoC02_35051270_295             | BoC02 | 35051270 |
| BnA02 | bna1053  | 71.3 |                                |       |          |
| BnA02 | bna4764  | 71.4 | BoC05_8530889_302              |       |          |
| BnA02 | bna0540  | 71.7 | BoC02_35600452_301             | BoC02 | 35600452 |
| BnA02 | BGO153   | 73.4 | BrA02_22858298_238             |       |          |
| BnA02 | bna0587  | 77.7 | BoC02_36701272_301             | BoC02 | 36701272 |
| BnA02 | bna0743  | 80.7 | BoC02_43650063_300             |       |          |
| BnA02 | BEN189A  | 81.6 |                                |       |          |
| BnA02 | CB10022B | 91   |                                |       |          |
| BnA02 | BrGMS363 | 92.4 | BrA02_27738746_153             |       |          |
| BnA02 | bna1514  | 92.7 | BrA02_27812564_301             |       |          |
| BnA02 | bna3571  | 93.8 | BoC02_41705763_301             | BoC02 | 41705763 |
| BnA02 | bna3565  | 93.8 | BoScaffold000121_P2_789519_301 |       |          |
| BnA02 | bna3564  | 93.8 | BoScaffold000121_P2_775141_301 |       |          |
| BnA02 | bna3568  | 93.8 | BrA02_27439547_301             |       |          |
| BnA02 | bna3569  | 93.8 | BoC02_41757926_287             | BoC02 | 41757926 |
| BnA02 | bna3566  | 96.8 | BoScaffold000514_31276_301     |       |          |
| BnA02 | BEN349   | 99.2 |                                |       |          |
| <hr/> |          |      |                                |       |          |
| BnA03 | sN2032   | 0    |                                |       |          |
| BnA03 | bna0051  | 0.3  | BoScaffold000091_1664085_301   |       |          |
| BnA03 | bna3560  | 0.3  | BoScaffold000407_6294_301      |       |          |
| BnA03 | bna0288  | 0.3  | BoC03_32383728_301             | BoC03 | 32383728 |
| BnA03 | bna3791  | 3.6  | BoC03_39863170_301             | BoC03 | 39863170 |
| BnA03 | bna3790  | 3.6  | BoC03_39888365_301             | BoC03 | 39888365 |
| BnA03 | bna5949  | 3.6  | BoC03_40197638_301             | BoC03 | 40197638 |
| BnA03 | CALSSRB  | 3.6  | BoC03_40355283_138             | BoC03 | 40355283 |
| BnA03 | bna3780  | 3.6  | BoC03_40477244_304             | BoC03 | 40477244 |
| BnA03 | bna3789  | 3.6  | BrA06_10261885_283             |       |          |
| BnA03 | bna3782  | 3.6  | BrA08_17627997_303             |       |          |
| BnA03 | bna3778  | 3.6  | BoC03_40501352_301             | BoC03 | 40501352 |
| BnA03 | bna3775  | 3.6  | BoC03_40591901_303             | BoC03 | 40591901 |
| BnA03 | BoGMS819 | 6.2  |                                |       |          |
| BnA03 | BGO120   | 10.1 | BoC03_43720660_235             | BoC03 | 43720660 |
| BnA03 | bna0738  | 10.4 | BoC06_4218118_188              |       |          |
| BnA03 | bna0639  | 11   | BoC03_43830330_301             | BoC03 | 43830330 |
| BnA03 | BoGMS680 | 14.6 |                                |       |          |

|       |            |      |                                 |       |          |
|-------|------------|------|---------------------------------|-------|----------|
| BnA03 | bnA0583    | 15.5 | BoC03_44543356_301              | BoC03 | 44543356 |
| BnA03 | bnA2666    | 15.8 | BrA08_16479209_192              |       |          |
| BnA03 | bnA5138    | 15.8 | BrA08_16478870_298              |       |          |
| BnA03 | bnA3811    | 16.4 | BoC03_45939776_300              | BoC03 | 45939776 |
| BnA03 | BoGMS154   | 16.7 |                                 |       |          |
| BnA03 | bnA3783    | 18.4 | BoC03_40257094_301              |       |          |
| BnA03 | bnA3810    | 18.4 | BoC03_46851701_301              | BoC03 | 46851701 |
| BnA03 | bnA3807    | 19.8 | BoC03_47298054_301              | BoC03 | 47298054 |
| BnA03 | bnA3806    | 19.8 | BoC03_47311414_301              | BoC03 | 47311414 |
| BnA03 | bnA4714    | 19.8 | BoC03_47341746_301              | BoC03 | 47341746 |
| BnA03 | bnA3805    | 19.8 | BoC03_47417434_295              | BoC03 | 47417434 |
| BnA03 | bnA4713    | 19.8 |                                 |       |          |
| BnA03 | bnA3804    | 19.8 | BoScaffold000009_P1_1530670_280 |       |          |
| BnA03 | bnA3802    | 19.8 | BoC03_47584059_280              | BoC03 | 47584059 |
| BnA03 | bnA0078    | 19.8 | BoC03_47610468_156              | BoC03 | 47610468 |
| BnA03 | bnA4962    | 19.8 | BoC03_47616595_270              | BoC03 | 47616595 |
| BnA03 | bnA0146    | 19.8 | BoC03_47617425_301              | BoC03 | 47617425 |
| BnA03 | BoGMS1295  | 20.1 |                                 |       |          |
| BnA03 | bnA3801    | 20.4 | BoC03_47620248_301              | BoC03 | 47620248 |
| BnA03 | bnA3800    | 20.4 | BoC03_47645315_307              | BoC03 | 47645315 |
| BnA03 | bnA3394    | 39   | BoScaffold000098_115349_301     |       |          |
| BnA03 | BEN123     | 39.6 | BrA03_6449351_263               |       |          |
| BnA03 | BN12AB     | 40.2 | BrA03_6265845_277               |       |          |
| BnA03 | bnA3612    | 41.1 | BoC03_7268049_303               | BoC03 | 7268049  |
| BnA03 | bnA3613    | 41.1 | BrA03_6261112_302               |       |          |
| BnA03 | bnA3614    | 41.4 | BoC03_7073696_301               | BoC03 | 7073696  |
| BnA03 | bnA4964    | 41.4 | BoC03_7009435_301               | BoC03 | 7009435  |
| BnA03 | bnA3615    | 41.4 | BoC03_6946602_301               | BoC03 | 6946602  |
| BnA03 | bnA3616    | 41.4 | BoC03_6931807_301               | BoC03 | 6931807  |
| BnA03 | bnA3627    | 43.7 | BoC03_6535141_301               | BoC03 | 6535141  |
| BnA03 | bnA3628    | 43.7 | BoC03_6513447_305               | BoC03 | 6513447  |
| BnA03 | bnA3629    | 43.7 | BoC03_6491259_301               | BoC03 | 6491259  |
| BnA03 | BEN190A    | 46.3 | BoC03_6271105_286               | BoC03 | 6271105  |
| BnA03 | Na14-E02   | 47.4 |                                 |       |          |
| BnA03 | OI10-D03C  | 55.2 |                                 |       |          |
| BnA03 | bnA3582    | 59.8 | BrA03_4102152_300               |       |          |
| BnA03 | bnA3603    | 60.1 | BoC03_4914984_300               | BoC03 | 4914984  |
| BnA03 | bnA3588    | 60.1 | BoC03_4552667_284               | BoC03 | 4552667  |
| BnA03 | bnA3593    | 61   | BoC03_4170187_301               | BoC03 | 4170187  |
| BnA03 | BoGMS1464A | 62.1 |                                 |       |          |
| BnA03 | BGO125     | 62.1 | BoC03_3682470_273               | BoC03 | 3682470  |
| BnA03 | bnA5036    | 63.5 | BoC03_3574955_301               | BoC03 | 3574955  |
| BnA03 | bnA1289    | 65.5 | BoC01_20781518_301              |       |          |
| BnA03 | bnA5481    | 65.5 | BoC03_2042670_301               | BoC03 | 2042670  |
| BnA03 | bnA3689    | 66.6 | BoC03_1724642_215               | BoC03 | 1724642  |
| BnA03 | bnA3688    | 66.6 | BoC03_1704921_301               | BoC03 | 1704921  |
| BnA03 | bnA3685    | 68.9 | BrA03_1485228_301               |       |          |



|       |            |       |                    |       |          |
|-------|------------|-------|--------------------|-------|----------|
| BnA03 | bnA0107    | 70.3  | BoC03_24221_231    | BoC03 | 24221    |
| BnA03 | bnA0198    | 71.4  | BrA03_135000_254   |       |          |
| BnA03 | bnA0197    | 71.4  | BrA03_80381_301    |       |          |
| BnA03 | BRMS-008   | 72.3  | BrA03_53344_165    |       |          |
| BnA03 | BrGMS679   | 74    | BrA03_43587_209    |       |          |
| BnA03 | BnEMS993   | 76.1  |                    |       |          |
| BnA03 | BRMS-006   | 78.4  |                    |       |          |
| BnA03 | BoGMS1320  | 83    |                    |       |          |
| BnA03 | BoGMS1201  | 85.7  |                    |       |          |
| BnA03 | BoGMS1373  | 86.3  |                    |       |          |
| BnA03 | sR12137IA  | 88.2  | BrA03_1699524_355  |       |          |
| BnA03 | BoGMS1307  | 92.1  |                    |       |          |
| BnA03 | CB10413    | 113.8 | BrA03_28648208_215 | BrA03 | 28648208 |
| BnA03 | BGR54      | 115.8 | BrA03_28268108_129 | BrA03 | 28268108 |
| BnA03 | bnA1538    | 116.4 | BrA03_28222246_301 | BrA03 | 28222246 |
| BnA03 | bnA1542    | 116.4 | BrA03_27821377_289 | BrA03 | 27821377 |
| BnA03 | bnA1545    | 116.4 | BrA03_27612941_301 | BrA03 | 27612941 |
| BnA03 | bnA1546    | 116.7 | BrA03_27561648_301 | BrA03 | 27561648 |
| BnA03 | bnA1547    | 116.7 | BrA03_27455080_301 | BrA03 | 27455080 |
| BnA03 | bnA1548    | 116.7 | BrA03_27445975_306 | BrA03 | 27445975 |
| BnA03 | bnA5278    | 117   | BrA03_27399085_301 | BrA03 | 27399085 |
| BnA03 | bnA1549    | 117   | BrA03_27385091_301 | BrA03 | 27385091 |
| BnA03 | BrGMS509   | 117.3 | BrA03_27239138_278 | BrA03 | 27239138 |
| BnA03 | bnA5279    | 117.6 | BrA03_27181901_301 | BrA03 | 27181901 |
| BnA03 | bnA1551    | 117.6 | BrA03_27104883_301 | BrA03 | 27104883 |
| BnA03 | bnA1552    | 118.7 | BrA03_26637960_298 | BrA03 | 26637960 |
| BnA03 | bnA1553    | 118.7 | BrA03_26608007_293 | BrA03 | 26608007 |
| BnA03 | bnA1802    | 138.5 | BrA03_501255_301   | BrA03 | 501255   |
| BnA03 | Na10-G10   | 139.1 | BrA03_672353_135   | BrA03 | 672353   |
| BnA03 | bnA5585    | 141.1 | BrA03_1596241_300  | BrA03 | 1596241  |
| BnA03 | sR12137IB  | 141.4 | BrA03_1699524_355  | BrA03 | 1699524  |
| BnA03 | BEN320     | 142   | BoC03_1630224_238  |       |          |
| BnA03 | BoGMS539   | 144   | BrA03_1821839_183  | BrA03 | 1821839  |
| BnA03 | BGO029     | 146   | BrA03_3156872_138  | BrA03 | 3156872  |
| BnA03 | BoGMS1464B | 146.6 |                    |       |          |
| BnA03 | bnA1748    | 148.9 | BrA03_4257090_301  | BrA03 | 4257090  |
| BnA03 | bnA5581    | 148.9 | BrA03_4339043_301  | BrA03 | 4339043  |
| BnA03 | bnA1747    | 148.9 | BrA03_4399435_301  | BrA03 | 4399435  |
| BnA03 | bnA1743    | 151.2 | BrA03_5006694_301  | BrA03 | 5006694  |
| BnA03 | bnA1741    | 151.2 | BrA03_5083348_301  | BrA03 | 5083348  |
| BnA03 | bnA0462    | 151.2 | BoC03_5872410_301  |       |          |
| BnA03 | bnA1740    | 151.2 | BrA03_5160080_301  | BrA03 | 5160080  |
| BnA03 | BEN190B    | 152.6 | BoC03_6271105_286  |       |          |
| BnA03 | bnA1738    | 153.2 | BrA03_5415096_301  | BrA03 | 5415096  |
| BnA03 | bnA1736    | 153.2 | BrA03_5523389_301  | BrA03 | 5523389  |
| BnA03 | bnA1730    | 153.8 | BrA03_6018284_301  | BrA03 | 6018284  |
| BnA03 | BN12AA     | 154.7 | BrA03_6265845_277  | BrA03 | 6265845  |

|       |           |       |                             |       |          |
|-------|-----------|-------|-----------------------------|-------|----------|
| BnA03 | BEN251    | 154.7 | BrA03_6283089_162           | BrA03 | 6283089  |
| BnA03 | bnA1727   | 155.3 | BrA03_6286513_301           | BrA03 | 6286513  |
| BnA03 | BnEMS1084 | 157   | BrA03_6289126_377           | BrA03 | 6289126  |
| BnA03 | bnA5580   | 158.7 | BrA03_6423348_301           | BrA03 | 6423348  |
| BnA03 | bnA1722   | 159   | BrA03_6758687_302           | BrA03 | 6758687  |
| BnA03 | bnA1717   | 159.6 | BrA03_7094848_303           | BrA03 | 7094848  |
| BnA03 | bnA1716   | 159.6 | BrA03_7178701_155           | BrA03 | 7178701  |
| BnA03 | bnA1715   | 159.6 | BrA03_7225004_272           | BrA03 | 7225004  |
| BnA03 | bnA1713   | 159.6 | BrA03_7284240_301           | BrA03 | 7284240  |
| BnA03 | BGR80     | 161.9 | BrA03_7377352_124           | BrA03 | 7377352  |
| BnA03 | bnA1712   | 163   | BrA03_7521574_301           | BrA03 | 7521574  |
| BnA03 | bnA1711   | 163   | BrA03_7618218_224           | BrA03 | 7618218  |
| BnA03 | bnA1709   | 163.3 | BrA03_7766266_309           | BrA03 | 7766266  |
| BnA03 | bnA5064   | 163.3 | BrA03_7793224_299           | BrA03 | 7793224  |
| BnA03 | bnA1706   | 163.3 | BrA03_7935716_301           | BrA03 | 7935716  |
| BnA03 | Na12-E02A | 163.9 | BrA03_7953653_103           | BrA03 | 7953653  |
| BnA03 | bnA0092   | 165.3 | BrA03_8627204_301           | BrA03 | 8627204  |
| BnA03 | bnA1842   | 165.6 | BrA03_8940224_301           | BrA03 | 8940224  |
| BnA03 | BGR75     | 166.7 | BrA03_8963189_141           | BrA03 | 8963189  |
| BnA03 | bnA5284   | 170.6 | BrA03_9243550_307           | BrA03 | 9243550  |
| BnA03 | bnA1846   | 170.6 | BrA03_9250681_288           | BrA03 | 9250681  |
| BnA03 | bnA1847   | 170.6 | BrA03_9258827_301           | BrA03 | 9258827  |
| BnA03 | bnA1849   | 170.6 | BoC03_10808656_301          |       |          |
| BnA03 | bnA5880   | 170.6 | BrA03_9382131_301           | BrA03 | 9382131  |
| BnA03 | bnA1851   | 171.2 | BrA03_9627215_301           | BrA03 | 9627215  |
| BnA03 | bnA5590   | 171.2 | BrA03_9641522_301           | BrA03 | 9641522  |
| BnA03 | bnA1852   | 171.2 | BrA03_9657714_299           | BrA03 | 9657714  |
| BnA03 | bnA5577   | 172.1 | BrA03_10455016_301          | BrA03 | 10455016 |
| BnA03 | bnA1692   | 173   | BrA03_10716163_301          | BrA03 | 10716163 |
| BnA03 | bnA1691   | 173   | BrA03_10761610_301          | BrA03 | 10761610 |
| BnA03 | bnA0057   | 173   | BrA03_10900451_301          | BrA03 | 10900451 |
| BnA03 | bnA1686   | 173   | BrA03_10969259_301          | BrA03 | 10969259 |
| BnA03 | BRAS087B  | 176.8 | BoC03_16290437_171          |       |          |
| BnA03 | BRAS051B  | 178   |                             |       |          |
| BnA03 | BEN133    | 178.6 | BrA03_11054113_157          | BrA03 | 11054113 |
| BnA03 | bnA1685   | 179.5 | BrA03_11070726_301          | BrA03 | 11070726 |
| BnA03 | bnA1683   | 179.5 | BrA03_11218618_301          | BrA03 | 11218618 |
| BnA03 | bnA5575   | 179.5 | BrA03_11319872_301          | BrA03 | 11319872 |
| BnA03 | bnA1681   | 179.5 | BrA03_11365646_301          | BrA03 | 11365646 |
| BnA03 | bnA1678   | 179.5 | BrA03_11499674_302          | BrA03 | 11499674 |
| BnA03 | bnA1682   | 179.5 | BrScaffold000167_105752_301 |       |          |
| BnA03 | bnA1677   | 179.5 | BrA03_11531312_301          | BrA03 | 11531312 |
| BnA03 | bnA4986   | 179.5 | BrA03_11534180_301          | BrA03 | 11534180 |
| BnA03 | bnA0238   | 179.5 | BoC03_14372308_301          |       |          |
| BnA03 | bnA1676   | 179.5 | BrA03_11593119_301          | BrA03 | 11593119 |
| BnA03 | bnA1674   | 179.5 | BrA03_11685935_300          | BrA03 | 11685935 |
| BnA03 | bnA1673   | 180.1 | BrA03_12316922_301          | BrA03 | 12316922 |

|       |           |       |                              |       |          |
|-------|-----------|-------|------------------------------|-------|----------|
| BnA03 | bna1232   | 180.1 | BrA03_12548931_305           | BrA03 | 12548931 |
| BnA03 | bna1670   | 180.4 | BrA03_12932549_301           | BrA03 | 12932549 |
| BnA03 | bna1669   | 180.4 | BrA03_12933240_294           | BrA03 | 12933240 |
| BnA03 | bna4985   | 180.4 | BrA03_12990760_301           | BrA03 | 12990760 |
| BnA03 | bna1667   | 180.4 | BrA03_13160678_301           | BrA03 | 13160678 |
| BnA03 | bna1665   | 180.4 | BrA03_13257273_260           | BrA03 | 13257273 |
| BnA03 | bna2170   | 180.4 | BrA05_3828439_301            |       |          |
| BnA03 | bna4844   | 180.4 | BrA03_13298884_301           | BrA03 | 13298884 |
| BnA03 | bna1663   | 180.4 | BrA03_13365862_301           | BrA03 | 13365862 |
| BnA03 | bna1662   | 180.4 | BrA03_13425088_301           | BrA03 | 13425088 |
| BnA03 | bna1660   | 180.4 | BrA03_13579698_250           | BrA03 | 13579698 |
| BnA03 | bna1659   | 181.5 | BrA03_13658610_263           | BrA03 | 13658610 |
| BnA03 | bna5446   | 181.5 | BrA03_13678885_301           | BrA03 | 13678885 |
| BnA03 | bna5903   | 181.5 | BrA07_6044789_301            |       |          |
| BnA03 | bna1658   | 181.5 | BrA03_13707058_303           | BrA03 | 13707058 |
| BnA03 | bna1656   | 181.5 | BoC03_18995783_301           |       |          |
| BnA03 | bna1650   | 182.9 | BrA03_14292099_301           | BrA03 | 14292099 |
| BnA03 | BEN25     | 186.2 | BrA03_14628164_132           | BrA03 | 14628164 |
| BnA03 | bna1643   | 188.5 | BoScaffold000040_1433582_301 |       |          |
| BnA03 | bna1638   | 189.6 | BrA03_15368607_301           | BrA03 | 15368607 |
| BnA03 | bna1637   | 189.6 | BrA03_15421652_301           | BrA03 | 15421652 |
| BnA03 | BoGMS1425 | 190.5 |                              |       |          |
| BnA03 | BrGMS216  | 191.9 | BrA03_16125257_283           | BrA03 | 16125257 |
| BnA03 | BrGMS217  | 193.1 | BrA03_16137511_129           | BrA03 | 16137511 |
| BnA03 | BGR35     | 196.8 | BrA03_16137523_113           | BrA03 | 16137523 |
| BnA03 | bna1631   | 199.6 | BrA03_16229444_301           | BrA03 | 16229444 |
| BnA04 | bna0702   | 0     | BrA01_22363559_293           |       |          |
| BnA04 | bna0817   | 0.6   | BoC04_27594573_294           |       |          |
| BnA04 | bna0556   | 3.2   | BoC08_35189595_301           |       |          |
| BnA04 | sN13034   | 3.8   | BrA04_6624964_137            |       |          |
| BnA04 | BRAS021   | 5     |                              |       |          |
| BnA04 | Na10-C01A | 7.6   |                              |       |          |
| BnA04 | BoGMS829  | 7.6   |                              |       |          |
| BnA04 | bna2052   | 8.2   | BoC04_29405992_301           |       |          |
| BnA04 | bna0697   | 8.2   | BoC04_29321703_301           |       |          |
| BnA04 | BnEMS1184 | 32    | BrA04_276812_389             | BrA04 | 276812   |
| BnA04 | bna1810   | 33.1  | BrA04_600073_301             | BrA04 | 600073   |
| BnA04 | bna1822   | 35.7  | BrA04_1457537_301            | BrA04 | 1457537  |
| BnA04 | bna1827   | 37.1  | BrA04_1735132_301            | BrA04 | 1735132  |
| BnA04 | bna1828   | 37.1  | BrA04_1779999_301            | BrA04 | 1779999  |
| BnA04 | bna5083   | 37.1  | BrA04_1894868_214            | BrA04 | 1894868  |
| BnA04 | bna1830   | 37.1  | BrA04_1943599_301            | BrA04 | 1943599  |
| BnA04 | bna1832   | 37.4  | BrA04_2048437_301            | BrA04 | 2048437  |
| BnA04 | bna5913   | 37.7  | BrA04_2199893_301            | BrA04 | 2199893  |
| BnA04 | bna4845   | 37.7  | BrA04_2230696_301            | BrA04 | 2230696  |
| BnA04 | bna1834   | 37.7  | BrA04_2309487_289            | BrA04 | 2309487  |
| BnA04 | bna5592   | 38.6  | BrA04_2497900_301            | BrA04 | 2497900  |

|       |           |      |                             |       |          |
|-------|-----------|------|-----------------------------|-------|----------|
| BnA04 | bnA1860   | 38.9 | BrA04_2650277_301           | BrA04 | 2650277  |
| BnA04 | bnA1861   | 39.5 | BrA04_2688974_301           | BrA04 | 2688974  |
| BnA04 | bnA5593   | 39.5 | BrA04_2735498_301           | BrA04 | 2735498  |
| BnA04 | bnA5196   | 39.5 | BrA04_2933073_218           | BrA04 | 2933073  |
| BnA04 | bnA1865   | 39.5 | BrA04_2968931_301           | BrA04 | 2968931  |
| BnA04 | sR9411    | 40.9 |                             |       |          |
| BnA04 | bnA5868   | 45.2 | BrA04_4112310_301           | BrA04 | 4112310  |
| BnA04 | bnA5595   | 45.2 | BrA04_4259512_185           | BrA04 | 4259512  |
| BnA04 | bnA1876   | 45.2 | BrA04_4263813_301           | BrA04 | 4263813  |
| BnA04 | bnA5342   | 45.2 | BoC04_7704927_262           |       |          |
| BnA04 | BGR98     | 46.3 | BoC04_7807666_118           |       |          |
| BnA04 | CB10347   | 46.6 | BrA04_4267194_184           | BrA04 | 4267194  |
| BnA04 | bnA5881   | 47.5 | BrA06_5428029_222           |       |          |
| BnA04 | bnA1885   | 47.5 | BrA04_4823706_301           | BrA04 | 4823706  |
| BnA04 | bnA1884   | 47.5 | BrA04_4932863_301           | BrA04 | 4932863  |
| BnA04 | BnEMS1116 | 50.8 | BrA04_5237214_137           | BrA04 | 5237214  |
| BnA04 | bnA1882   | 54.1 | BrA04_5287304_301           | BrA04 | 5287304  |
| BnA04 | bnA1888   | 55   | BrA04_5985363_301           | BrA04 | 5985363  |
| BnA04 | bnA1893   | 56.1 | BrA04_7035364_301           | BrA04 | 7035364  |
| BnA04 | bnA1895   | 56.4 | BrA04_7233828_301           | BrA04 | 7233828  |
| BnA04 | bnA1900   | 56.4 | BrA04_7520180_301           | BrA04 | 7520180  |
| BnA04 | bnA1901   | 56.4 | BrA04_7588670_301           | BrA04 | 7588670  |
| BnA04 | bnA1894   | 56.4 | BrA08_19316263_301          |       |          |
| BnA04 | bnA3976   | 57.2 | BoScaffold000192_615990_301 |       |          |
| BnA04 | bnA5380   | 57.2 | BrA04_7643434_301           | BrA04 | 7643434  |
| BnA04 | BEN98     | 58.3 | BrA04_7920797_150           | BrA04 | 7920797  |
| BnA05 | BnGMS584B | 0    | BrA03_20134626_223          |       |          |
| BnA05 | BGR74     | 2.7  | BrA03_20135054_129          |       |          |
| BnA05 | Ra3-D04   | 3.3  |                             |       |          |
| BnA05 | BrGMS406  | 3.3  | BrA03_18621814_333          | BrA03 | 18621814 |
| BnA05 | Na10-A09  | 3.3  |                             |       |          |
| BnA05 | bnA1616   | 3.9  | BrA03_18834614_301          | BrA03 | 18834614 |
| BnA05 | bnA1615   | 3.9  | BrA03_18836652_294          | BrA03 | 18836652 |
| BnA05 | bnA1617   | 3.9  | BoC06_34818725_300          |       |          |
| BnA05 | bnA1613   | 4.2  | BoC03_25470736_300          |       |          |
| BnA05 | bnA1608   | 4.5  | BrA03_20080950_301          | BrA03 | 20080950 |
| BnA05 | bnA1601   | 5.1  | BrA03_20667595_269          | BrA03 | 20667595 |
| BnA05 | bnA5566   | 9    | BrA03_21198346_301          | BrA03 | 21198346 |
| BnA05 | bnA4349   | 9.6  | BoC06_37133106_225          |       |          |
| BnA05 | bnA1599   | 10.2 | BrA03_21504721_301          | BrA03 | 21504721 |
| BnA05 | bnA1590   | 13.5 | BrA03_22300522_303          | BrA03 | 22300522 |
| BnA05 | CB10034   | 16.8 | BoC06_38415389_93           |       |          |
| BnA05 | bnA2843   | 20.1 | BrA03_23127508_301          | BrA03 | 23127508 |
| BnA05 | bnA5886   | 20.3 | BrA03_23160521_301          | BrA03 | 23160521 |
| BnA05 | bnA1589   | 20.4 | BrA03_23467471_300          | BrA03 | 23467471 |
| BnA05 | bnA4642   | 20.4 | BrA03_23503230_234          | BrA03 | 23503230 |
| BnA05 | bnA5911   | 20.4 | BoC06_41088998_252          |       |          |

|       |           |      |                             |       |          |
|-------|-----------|------|-----------------------------|-------|----------|
| BnA05 | bna0038   | 20.4 | BrA03_23526906_301          | BrA03 | 23526906 |
| BnA05 | bna0037   | 20.4 | BrA03_23528679_301          | BrA03 | 23528679 |
| BnA05 | bna1585   | 20.4 | BrA03_23800118_301          | BrA03 | 23800118 |
| BnA05 | bna4840   | 21.5 | BrA03_23887523_299          | BrA03 | 23887523 |
| BnA05 | bna1584   | 22.4 | BrA03_24365533_301          | BrA03 | 24365533 |
| BnA05 | bna1575   | 23   | BrA03_25047900_301          | BrA03 | 25047900 |
| BnA05 | pMR181B   | 23.9 |                             |       |          |
| BnA05 | BEN83     | 25   | BoC06_43435020_259          |       |          |
| BnA05 | BnEMS146  | 25   | BrA03_25526885_250          | BrA03 | 25526885 |
| BnA05 | BGR56     | 25   | BoC06_43222338_105          |       |          |
| BnA05 | bna1572   | 25.3 | BrA03_25340743_301          | BrA03 | 25340743 |
| BnA05 | bna5121   | 25.3 | BrA03_25340743_301          | BrA03 | 25340743 |
| BnA05 | bna5097   | 25.3 | BrA03_25499459_223          | BrA03 | 25499459 |
| BnA05 | bna4838   | 25.3 | BrA03_25504906_301          | BrA03 | 25504906 |
| BnA05 | bna4389   | 25.6 | BoC06_43594658_301          |       |          |
| BnA05 | bna1571   | 25.6 | BrA03_25614556_301          | BrA03 | 25614556 |
| BnA05 | bna1567   | 25.6 | BoC06_43730699_301          |       |          |
| BnA05 | bna0021   | 26.4 | BrA03_26163719_301          | BrA03 | 26163719 |
| BnA05 | bna5444   | 27.3 | BrA03_26272710_301          | BrA03 | 26272710 |
| BnA05 | BnGMS265  | 43.6 | BrA05_22210227_345          | BrA05 | 22210227 |
| BnA05 | sR9477    | 44.8 | BrA05_22498503_263          | BrA05 | 22498503 |
| BnA05 | bna2038   | 45.7 | BrA05_22292108_301          | BrA05 | 22292108 |
| BnA05 | bna5616   | 46.3 | BrA05_22427562_301          | BrA05 | 22427562 |
| BnA05 | bna2037   | 46.3 | BrA05_22427562_301          | BrA05 | 22427562 |
| BnA05 | BGR38     | 48   | BrA05_22561185_146          | BrA05 | 22561185 |
| BnA05 | bna2035   | 48.6 | BrA05_22580798_289          | BrA05 | 22580798 |
| BnA05 | bna5092   | 48.6 | BrA05_22631736_297          | BrA05 | 22631736 |
| BnA05 | bna2033   | 49.5 | BrA05_22766863_301          | BrA05 | 22766863 |
| BnA05 | bna2028   | 50.1 | BrA05_23020982_301          | BrA05 | 23020982 |
| BnA05 | bna1476   | 50.7 | BrA02_23247623_301          |       |          |
| BnA05 | bna5091   | 50.7 | BoC05_32701848_301          | BoC05 | 32701848 |
| BnA05 | bna2029   | 51.3 | BoC05_32515770_301          | BoC05 | 32515770 |
| BnA05 | bna5450   | 51.6 | BoC05_32350689_300          | BoC05 | 32350689 |
| BnA05 | bna2030   | 51.6 | BoC05_32350587_297          | BoC05 | 32350587 |
| BnA05 | bna5288   | 52.5 | BrA05_23082022_302          | BrA05 | 23082022 |
| BnA05 | bna2026   | 52.8 | BrA05_23162355_301          | BrA05 | 23162355 |
| BnA05 | bna5090   | 53.4 | BrA05_23207558_245          | BrA05 | 23207558 |
| BnA05 | BRMS-007  | 54.5 | BrA05_23268922_132          | BrA05 | 23268922 |
| BnA05 | bna5615   | 55.6 | BrA05_23385467_301          | BrA05 | 23385467 |
| BnA05 | bna2024   | 55.9 | BrA05_23425922_301          | BrA05 | 23425922 |
| BnA05 | bna2025   | 56.5 | BrA05_23502843_301          | BrA05 | 23502843 |
| BnA05 | BoGMS1059 | 58.2 |                             |       |          |
| BnA05 | bna1515   | 59.3 | BrA02_26946155_301          |       |          |
| BnA05 | bna5991   | 59.3 | BoScaffold000460_96754_301  |       |          |
| BnA05 | bna0286   | 59.4 | BrScaffold000191_59457_298  |       |          |
| BnA05 | bna0306   | 59.5 | BrScaffold000203_24232_301  |       |          |
| BnA05 | bna1516   | 59.8 | BoScaffold000460_119035_272 |       |          |

|       |           |      |                             |       |          |
|-------|-----------|------|-----------------------------|-------|----------|
| BnA05 | bnA5371   | 59.8 | BoScaffold000461_93279_301  |       |          |
| BnA05 | bnA0321   | 61.1 | BrA02_26686182_208          |       |          |
| BnA05 | bnA1511   | 61.5 | BrA02_26644147_301          |       |          |
| BnA05 | bnA2023   | 62.6 | BrA05_23533846_301          | BrA05 | 23533846 |
| BnA05 | BEN200A   | 63.2 | BrA05_23831506_214          | BrA05 | 23831506 |
| BnA06 | bnA5650   | 0    | BrA06_2993650_301           | BrA06 | 2993650  |
| BnA06 | bnA5651   | 0.3  | BrA06_3114668_301           | BrA06 | 3114668  |
| BnA06 | bnA4853   | 0.3  | BrA06_3203762_301           | BrA06 | 3203762  |
| BnA06 | bnA0130   | 0.3  | BrA06_3279046_301           | BrA06 | 3279046  |
| BnA06 | bnA2267   | 0.3  | BrA06_3279046_301           | BrA06 | 3279046  |
| BnA06 | sN2837    | 3.6  | BrA06_3578834_153           | BrA06 | 3578834  |
| BnA06 | bnA5251   | 4.2  | BrA06_3651623_301           | BrA06 | 3651623  |
| BnA06 | bnA2259   | 4.2  | BrA06_3651623_301           | BrA06 | 3651623  |
| BnA06 | Na12-D08  | 5.1  | BrA06_3726880_69            | BrA06 | 3726880  |
| BnA06 | bnA5040   | 5.7  | BrA06_3867444_242           | BrA06 | 3867444  |
| BnA06 | bnA2254   | 5.7  | BrA06_3867444_242           | BrA06 | 3867444  |
| BnA06 | bnA5392   | 6.8  | BrA06_4026624_322           | BrA06 | 4026624  |
| BnA06 | bnA2251   | 6.8  | BrA06_4035954_301           | BrA06 | 4035954  |
| BnA06 | OI10-D01  | 8.2  | BrA06_4399748_208           | BrA06 | 4399748  |
| BnA06 | bnA2247   | 9.9  | BrA06_4534080_301           | BrA06 | 4534080  |
| BnA06 | bnA2245   | 9.9  | BoScaffold000127_203799_227 |       |          |
| BnA06 | bnA5455   | 9.9  | BoScaffold000127_203799_227 |       |          |
| BnA06 | bnA4062   | 9.9  | BoC05_3725941_301           |       |          |
| BnA06 | bnA2246   | 9.9  | BrA06_4738919_263           | BrA06 | 4738919  |
| BnA06 | bnA5657   | 10.2 | BrA06_5577784_301           | BrA06 | 5577784  |
| BnA06 | bnA5887   | 10.5 | BrA09_16121849_288          |       |          |
| BnA06 | bnA5932   | 10.5 | BrA09_16121849_288          |       |          |
| BnA06 | bnA2279   | 11.6 | BrA06_6520150_300           | BrA06 | 6520150  |
| BnA06 | bnA5343   | 12.5 | BrA06_6691478_301           | BrA06 | 6691478  |
| BnA06 | bnA5658   | 12.8 | BrA06_6878642_301           | BrA06 | 6878642  |
| BnA06 | BEN253    | 16.4 | BrA06_9151367_207           | BrA06 | 9151367  |
| BnA06 | bnA5132   | 17   | BrA06_10134979_311          | BrA06 | 10134979 |
| BnA06 | bnA1897   | 17   | BrScaffold000178_232155_303 |       |          |
| BnA06 | bnA3792   | 17   | BoC03_39765391_301          |       |          |
| BnA06 | bnA3796   | 17   | BoC03_39601720_301          |       |          |
| BnA06 | bnA5781   | 17.3 | BrScaffold000244_26717_302  |       |          |
| BnA06 | bnA0279   | 17.3 | BrScaffold000796_970_278    |       |          |
| BnA06 | bnA4342   | 17.3 | BrA06_11667624_301          | BrA06 | 11667624 |
| BnA06 | bnA5142   | 17.6 | BrA06_19593663_299          | BrA06 | 19593663 |
| BnA06 | bnA0335   | 17.6 | BrA06_19609664_301          | BrA06 | 19609664 |
| BnA06 | BGR34     | 18.2 | BrA06_11864505_137          | BrA06 | 11864505 |
| BnA06 | BRMS-049A | 18.5 | BrA06_12580768_141          | BrA06 | 12580768 |
| BnA06 | BoGMS1203 | 19.6 |                             |       |          |
| BnA06 | BoGMS1230 | 23.9 |                             |       |          |
| BnA06 | bnA2318   | 29.2 | BrA06_14265955_298          | BrA06 | 14265955 |
| BnA06 | bnA4958   | 29.2 | BrA06_14594986_291          | BrA06 | 14594986 |
| BnA06 | bnA2296   | 33.8 | BrA06_16620834_301          | BrA06 | 16620834 |

|       |          |      |                             |       |          |
|-------|----------|------|-----------------------------|-------|----------|
| BnA06 | bnA2297  | 34.1 | BrA06_16659915_301          | BrA06 | 16659915 |
| BnA06 | bnA2580  | 34.7 | BrA07_1396686_301           |       |          |
| BnA06 | bnA2311  | 37.7 | BoScaffold000153_664915_261 |       |          |
| BnA06 | bnA2305  | 40.4 | BrA06_17822965_301          | BrA06 | 17822965 |
| BnA06 | BGR45    | 41.3 | BrA06_17992203_105          | BrA06 | 17992203 |
| BnA06 | BoGMS314 | 41.6 | BrA06_18069372_115          | BrA06 | 18069372 |
| BnA06 | bnA2307  | 42.2 | BrA06_18116757_177          | BrA06 | 18116757 |
| BnA06 | bnA4990  | 42.2 | BoC06_35346921_292          |       |          |
| BnA06 | bnA5395  | 42.5 | BoScaffold000153_664915_261 |       |          |
| BnA06 | bnA5898  | 42.5 | BrA06_18657413_302          | BrA06 | 18657413 |
| BnA06 | bnA5877  | 42.5 | BrA06_18657413_302          | BrA06 | 18657413 |
| BnA06 | bnA2312  | 42.8 | BrA06_18772227_301          | BrA06 | 18772227 |
| BnA06 | bnA2339  | 43.7 | BrA06_21171937_301          | BrA06 | 21171937 |
| BnA06 | bnA4655  | 44   | BrA06_21247253_219          | BrA06 | 21247253 |
| BnA06 | bnA5665  | 44.3 | BrA06_21475708_303          | BrA06 | 21475708 |
| BnA06 | bnA2336  | 44.3 | BrA06_21512860_268          | BrA06 | 21512860 |
| BnA06 | bnA5922  | 46   | BrA06_21676878_301          | BrA06 | 21676878 |
| BnA06 | BnEMS59  | 47.4 | BrA06_21942889_171          | BrA06 | 21942889 |
| BnA06 | BnEMS60  | 47.7 | BrA06_21942889_171          | BrA06 | 21942889 |
| BnA06 | bnA2342  | 51   | BrA06_22104886_300          | BrA06 | 22104886 |
| BnA06 | bnA5298  | 57   | BrA06_22807945_301          | BrA06 | 22807945 |
| BnA06 | bnA2344  | 57   | BrA06_22807945_301          | BrA06 | 22807945 |
| BnA06 | bnA2346  | 57   | BrA06_22896930_301          | BrA06 | 22896930 |
| BnA06 | sR12156A | 58.1 | BrA06_23032511_177          | BrA06 | 23032511 |
| BnA06 | bnA5923  | 58.7 | BrA06_23656979_285          | BrA06 | 23656979 |
| BnA06 | bnA2358  | 59.3 | BrA06_24695710_301          | BrA06 | 24695710 |
| BnA06 | bnA0629  | 59.3 | BoC06_27820808_301          |       |          |
| BnA06 | BEN278B  | 59.9 | BoC06_29189191_152          |       |          |
| BnA06 | bnA2364  | 64.2 | BrA06_26039984_299          | BrA06 | 26039984 |
| BnA06 | bnA5347  | 64.2 | BrA06_26039984_299          | BrA06 | 26039984 |
| BnA06 | CB10330  | 65.4 | BrA06_26104700_148          | BrA06 | 26104700 |
| BnA06 | BnEMS695 | 66.4 | BrA06_26241942_212          | BrA06 | 26241942 |
| <hr/> |          |      |                             |       |          |
| BnA07 | BEN200B  | 0    |                             |       |          |
| BnA07 | bnA1214  | 0.6  | BrA04_9976097_301           |       |          |
| BnA07 | bnA0860  | 0.6  | BoScaffold000485_60469_265  |       |          |
| BnA07 | BEN186   | 1.7  |                             |       |          |
| BnA07 | bnA0837  | 2    | BoC05_32800593_301          |       |          |
| BnA07 | bnA4140  | 2.3  | BoScaffold000461_38186_301  |       |          |
| BnA07 | bnA0084  | 2.3  | BoC05_32774889_301          |       |          |
| BnA07 | bnA0882  | 2.3  | BoScaffold000460_57388_301  |       |          |
| BnA07 | bnA0826  | 5.3  | BoScaffold000462_60360_302  |       |          |
| BnA07 | bnA0771  | 25.7 | BoC07_13343898_301          | BoC07 | 13343898 |
| BnA07 | bnA3841  | 26.6 | BoC07_13552421_301          | BoC07 | 13552421 |
| BnA07 | bnA3149  | 35.5 | BoC04_33944565_303          |       |          |
| BnA07 | bnA0896  | 35.8 | BoScaffold000401_119918_239 |       |          |
| BnA07 | bnA0806  | 36.1 | BoScaffold000401_176117_301 |       |          |
| BnA07 | bnA0594  | 36.4 | BoC07_15896409_301          | BoC07 | 15896409 |

|       |           |      |                                |       |          |
|-------|-----------|------|--------------------------------|-------|----------|
| BnA07 | bnA3875   | 37.8 | BoC06_13001402_300             |       |          |
| BnA07 | bnA3878   | 37.8 | BoScaffold000029_1537639_301   |       |          |
| BnA07 | bnA3877   | 37.8 | BoScaffold000029_1577084_301   |       |          |
| BnA07 | bnA4817   | 37.8 | BoScaffold000029_1654518_301   |       |          |
| BnA07 | bnA0351   | 37.8 | BrA01_21633874_301             |       |          |
| BnA07 | bnA3876   | 37.8 | BoScaffold000029_1736580_301   |       |          |
| BnA07 | bnA0035   | 39.5 | BoScaffold000284_63051_301     |       |          |
| BnA07 | bnA0036   | 39.5 | BoScaffold000284_63570_300     |       |          |
| BnA07 | bnA0517   | 39.5 | BoScaffold000284_16130_301     |       |          |
| BnA07 | bnA4086   | 39.5 | BoC03_33143147_301             |       |          |
| BnA07 | OI10-D03B | 40.9 | BoC07_18528915_106             | BoC07 | 18528915 |
| BnA07 | bnA0547   | 41.5 | BoC07_18776685_301             | BoC07 | 18776685 |
| BnA07 | bnA4786   | 42.9 | BrA05_11057670_301             |       |          |
| BnA07 | bnA0423   | 43.2 | BoC07_20728474_301             | BoC07 | 20728474 |
| BnA07 | BoGMS490  | 45.5 | BoC07_21568379_300             | BoC07 | 21568379 |
| BnA07 | bnA4370   | 46.4 | BoC06_41160354_281             |       |          |
| BnA07 | bnA0951   | 47.3 | BoC07_21887638_301             | BoC07 | 21887638 |
| BnA07 | BGO160B   | 49.3 | BoC07_22121093_242             | BoC07 | 22121093 |
| BnA07 | BGO161    | 49.6 | BoC07_22141972_243             | BoC07 | 22141972 |
| BnA07 | BEN391A   | 49.6 | BoC07_22205936_234             | BoC07 | 22205936 |
| BnA07 | bnA0505   | 51.3 | BoC07_24768318_301             | BoC07 | 24768318 |
| BnA07 | bnA0504   | 52.7 | BoC07_25038543_302             | BoC07 | 25038543 |
| BnA07 | bnA1038   | 56.3 | BoScaffold000009_P1_226299_301 |       |          |
| BnA07 | bnA3842   | 56.6 | BoC07_25410267_301             | BoC07 | 25410267 |
| BnA07 | bnA5067   | 56.6 | BoC07_25424488_301             | BoC07 | 25424488 |
| BnA07 | bnA4502   | 56.6 | BoC07_25424488_301             | BoC07 | 25424488 |
| BnA07 | bnA3846   | 56.6 | BoC07_25858003_301             | BoC07 | 25858003 |
| BnA07 | bnA3851   | 56.6 | BoC07_26057612_301             | BoC07 | 26057612 |
| BnA07 | bnA0888   | 56.6 | BoC07_26256585_301             | BoC07 | 26256585 |
| BnA07 | bnA0866   | 57.5 | BoC07_40244944_301             |       |          |
| BnA07 | BoGMS545  | 80.6 | BrA07_277845_210               | BrA07 | 277845   |
| BnA07 | J0609     | 80.9 |                                |       |          |
| BnA07 | BGO114    | 80.9 |                                |       |          |
| BnA07 | bnA0323   | 81.5 | BrA07_359031_301               | BrA07 | 359031   |
| BnA07 | bnA2369   | 81.5 | BrA07_367720_301               | BrA07 | 367720   |
| BnA07 | sR4047    | 85.1 | BrA07_829294_270               | BrA07 | 829294   |
| BnA07 | bnA2411   | 86.5 | BrA07_923958_207               | BrA07 | 923958   |
| BnA07 | bnA2410   | 86.8 | BrA07_1197924_299              | BrA07 | 1197924  |
| BnA07 | bnA5003   | 87.1 | BrA07_1300601_296              | BrA07 | 1300601  |
| BnA07 | bnA3045   | 87.1 | BrA09_18277850_301             |       |          |
| BnA07 | bnA3044   | 87.1 | BrA07_1372394_300              | BrA07 | 1372394  |
| BnA07 | bnA5002   | 87.4 | BrA07_1595561_301              | BrA07 | 1595561  |
| BnA07 | bnA3040   | 87.4 | BrA10_11548392_301             |       |          |
| BnA07 | bnA5056   | 87.4 | BrA10_11839859_301             |       |          |
| BnA07 | bnA3036   | 87.4 | BrA10_11872043_301             |       |          |
| BnA07 | bnA3043   | 87.4 | BrA07_1603000_301              | BrA07 | 1603000  |
| BnA07 | bnA5888   | 87.4 | BrA07_1734481_301              | BrA07 | 1734481  |



|       |           |       |                    |       |          |
|-------|-----------|-------|--------------------|-------|----------|
| BnA07 | bnA5264   | 87.4  | BrA07_1766618_273  | BrA07 | 1766618  |
| BnA07 | bnA3128   | 87.4  | BrA07_1766618_273  | BrA07 | 1766618  |
| BnA07 | BoGMS1575 | 87.7  |                    |       |          |
| BnA07 | sR0282R   | 88    |                    |       |          |
| BnA07 | Na12-B02  | 89.4  |                    |       |          |
| BnA07 | bnA5777   | 90.3  | BrA10_3160721_301  |       |          |
| BnA07 | bnA3120   | 90.3  | BrA10_3243515_298  |       |          |
| BnA07 | bnA2378   | 90.3  | BrA08_9537088_276  |       |          |
| BnA07 | bnA3029   | 90.3  | BrA09_19718503_279 |       |          |
| BnA07 | bnA5661   | 90.3  | BrA10_3116354_268  |       |          |
| BnA07 | bnA2377   | 90.3  | BrA07_3065564_282  | BrA07 | 3065564  |
| BnA07 | bnA2382   | 90.6  | BrA07_3596136_301  | BrA07 | 3596136  |
| BnA07 | bnA2383   | 90.6  | BrA07_3717065_301  | BrA07 | 3717065  |
| BnA07 | bnA2390   | 90.6  | BoC06_3357873_302  |       |          |
| BnA07 | bnA2384   | 90.6  | BrA07_3796323_302  | BrA07 | 3796323  |
| BnA07 | bnA2386   | 90.6  | BrA07_3935049_301  | BrA07 | 3935049  |
| BnA07 | bnA2391   | 90.6  | BrA07_4180352_301  | BrA07 | 4180352  |
| BnA07 | bnA2394   | 91.2  | BrA07_4480120_291  | BrA07 | 4480120  |
| BnA07 | BEN236    | 91.5  | BrA07_4675434_199  | BrA07 | 4675434  |
| BnA07 | Ra2-G08   | 91.5  | BrA07_4761169_394  | BrA07 | 4761169  |
| BnA07 | bnA2396   | 91.8  | BrA07_4911941_301  | BrA07 | 4911941  |
| BnA07 | bnA2400   | 91.8  | BrA07_5089975_263  | BrA07 | 5089975  |
| BnA07 | bnA4856   | 92.1  | BrA01_10550339_299 |       |          |
| BnA07 | bnA2404   | 92.1  | BrA07_5367229_301  | BrA07 | 5367229  |
| BnA07 | BrGMS38   | 93.1  | BrA07_5615635_407  | BrA07 | 5615635  |
| BnA07 | bnA2416   | 94.7  | BrA07_6248377_104  | BrA07 | 6248377  |
| BnA07 | BEN45     | 95    | BrA07_6280732_122  | BrA07 | 6280732  |
| BnA07 | bnA2418   | 95.3  | BrA07_6360973_301  | BrA07 | 6360973  |
| BnA07 | bnA1324   | 96.2  | BrA07_7009807_279  | BrA07 | 7009807  |
| BnA07 | bnA2432   | 97.1  | BrA07_7562178_301  | BrA07 | 7562178  |
| BnA07 | BGR20     | 97.7  | BrA07_7572279_104  | BrA07 | 7572279  |
| BnA07 | bnA2433   | 98.6  | BrA07_7610939_301  | BrA07 | 7610939  |
| BnA07 | bnA2434   | 98.6  | BrA07_7635002_285  | BrA07 | 7635002  |
| BnA07 | bnA2435   | 98.9  | BrA07_7752491_226  | BrA07 | 7752491  |
| BnA07 | bnA2436   | 98.9  | BrA07_7874003_301  | BrA07 | 7874003  |
| BnA07 | bnA1477   | 99.2  | BoC09_38401229_303 |       |          |
| BnA07 | bnA2452   | 99.8  | BrA07_9030502_297  | BrA07 | 9030502  |
| BnA07 | bnA0287   | 100.7 | BrA01_12936313_302 |       |          |
| BnA07 | CB10299   | 101.8 | BrA07_9168262_154  | BrA07 | 9168262  |
| BnA07 | bnA0132   | 102.9 | BrA07_9841219_301  | BrA07 | 9841219  |
| BnA07 | bnA5173   | 102.9 | BrA07_10076851_301 | BrA07 | 10076851 |
| BnA07 | bnA2462   | 102.9 | BrA07_9867651_305  | BrA07 | 9867651  |
| BnA07 | bnA2464   | 102.9 | BrA07_10009675_301 | BrA07 | 10009675 |
| BnA07 | bnA2465   | 102.9 | BrA07_10070123_301 | BrA07 | 10070123 |
| BnA07 | BEN288    | 105.9 | BrA07_11178806_135 | BrA07 | 11178806 |
| BnA07 | BEN178    | 106.8 |                    |       |          |
| BnA07 | bnA2467   | 107.4 | BoC06_647138_302   |       |          |

|       |           |       |                    |       |          |
|-------|-----------|-------|--------------------|-------|----------|
| BnA07 | bnA1305   | 108.5 | BrA02_14309_301    | BrA02 | 14309    |
| BnA07 | bnA1307   | 108.5 | BrA02_76135_272    | BrA02 | 76135    |
| BnA07 | bnA5521   | 109.9 | BrA02_236832_302   | BrA02 | 236832   |
| BnA07 | bnA1312   | 110.2 | BrA02_303906_301   | BrA02 | 303906   |
| BnA07 | bnA5368   | 110.2 | BrA02_303906_301   | BrA02 | 303906   |
| BnA07 | bnA5597   | 110.8 | BrA04_9074350_301  |       |          |
| BnA07 | bnA1315   | 110.8 | BrA02_423955_211   | BrA02 | 423955   |
| BnA07 | bnA5524   | 110.8 | BrA02_613245_301   | BrA02 | 613245   |
| BnA07 | BEN254    | 111.7 |                    |       |          |
| BnA07 | bnA1320   | 112   | BrA02_647559_280   | BrA02 | 647559   |
| BnA07 | bnA5525   | 112   | BrA02_770869_301   | BrA02 | 770869   |
| BnA07 | bnA1322   | 112   | BrA02_810600_301   | BrA02 | 810600   |
| BnA07 | bnA2617   | 112   | BrA02_6306888_301  |       |          |
| BnA07 | bnA5188   | 112.6 | BrA07_11472403_301 | BrA07 | 11472403 |
| BnA07 | bnA2471   | 113.5 | BrA07_11728297_301 | BrA07 | 11728297 |
| BnA07 | bnA2473   | 113.8 | BrA07_11896650_302 | BrA07 | 11896650 |
| BnA07 | bnA2474   | 113.8 | BrA07_11898064_287 | BrA07 | 11898064 |
| BnA07 | bnA2475   | 113.8 | BrA07_11960515_301 | BrA07 | 11960515 |
| BnA07 | sR7223    | 114.1 | BrA07_12314707_413 | BrA07 | 12314707 |
| BnA07 | Ol09-A06B | 115   |                    |       |          |
| BnA07 | bnA4662   | 116.7 | BrA07_12361556_300 | BrA07 | 12361556 |
| BnA07 | bnA2483   | 116.7 | BrA07_12411966_301 | BrA07 | 12411966 |
| BnA07 | bnA5682   | 116.7 | BrA07_12511408_301 | BrA07 | 12511408 |
| BnA07 | CB10439   | 117   | BrA07_12579775_179 | BrA07 | 12579775 |
| BnA07 | sNRA59    | 119.6 | BrA07_13058693_125 | BrA07 | 13058693 |
| BnA07 | bnA2489   | 120.7 | BrA07_13156451_301 | BrA07 | 13156451 |
| BnA07 | bnA0085   | 121   | BrA07_13171897_301 | BrA07 | 13171897 |
| BnA07 | bnA2496   | 121   | BrA07_13283149_301 | BrA07 | 13283149 |
| BnA07 | bnA2498   | 121   | BrA07_13347565_301 | BrA07 | 13347565 |
| BnA07 | bnA2500   | 121   | BrA07_13513700_301 | BrA07 | 13513700 |
| BnA07 | bnA2502   | 121   | BrA07_13568545_301 | BrA07 | 13568545 |
| BnA07 | BnGMS147A | 121.3 | BrA07_13588712_232 | BrA07 | 13588712 |
| BnA07 | bnA2503   | 121.6 | BrA07_13642281_301 | BrA07 | 13642281 |
| BnA07 | bnA2504   | 121.6 | BrA07_13654040_301 | BrA07 | 13654040 |
| BnA07 | bnA5926   | 121.6 | BrA07_13674921_300 | BrA07 | 13674921 |
| BnA07 | bnA5302   | 121.9 | BrA07_13840515_301 | BrA07 | 13840515 |
| BnA07 | bnA0086   | 121.9 | BrA07_13936337_300 | BrA07 | 13936337 |
| BnA07 | bnA5045   | 121.9 | BrA07_14002506_301 | BrA07 | 14002506 |
| BnA07 | bnA2510   | 121.9 | BrA07_14002506_301 | BrA07 | 14002506 |
| BnA07 | bnA2512   | 121.9 | BrA07_14125225_301 | BrA07 | 14125225 |
| BnA07 | bnA4821   | 121.9 | BrA07_14326373_302 | BrA07 | 14326373 |
| BnA07 | bnA2514   | 121.9 | BrA07_14388103_301 | BrA07 | 14388103 |
| BnA07 | bnA0167   | 121.9 | BrA07_14594194_301 | BrA07 | 14594194 |
| BnA07 | bnA4778   | 121.9 | BrA07_14596135_301 | BrA07 | 14596135 |
| BnA07 | bnA0168   | 121.9 | BrA07_14599861_301 | BrA07 | 14599861 |
| BnA07 | BGR100    | 122.2 | BrA07_14656668_112 | BrA07 | 14656668 |
| BnA07 | BGR99A    | 122.2 | BrA07_14701381_148 | BrA07 | 14701381 |

|       |           |       |                             |       |          |
|-------|-----------|-------|-----------------------------|-------|----------|
| BnA07 | bnA2521   | 122.5 | BrA07_14792117_299          | BrA07 | 14792117 |
| BnA07 | bnA2524   | 122.5 | BrA07_14926716_301          | BrA07 | 14926716 |
| BnA07 | bnA2526   | 122.5 | BrA07_15006833_301          | BrA07 | 15006833 |
| BnA07 | BGO156B   | 122.8 | BrA07_15030696_149          | BrA07 | 15030696 |
| BnA07 | bnA0169   | 123.1 | BrA07_15353942_297          | BrA07 | 15353942 |
| BnA07 | bnA5112   | 123.1 | BoScaffold000343_161218_301 |       |          |
| BnA07 | bnA5688   | 123.1 | BrA07_15354338_301          | BrA07 | 15354338 |
| BnA07 | bnA0088   | 123.1 | BrA07_15381136_300          | BrA07 | 15381136 |
| BnA07 | bnA2540   | 123.4 | BrA07_16164923_302          | BrA07 | 16164923 |
| BnA07 | OI12-E03A | 124.3 | BrA07_16247167_117          | BrA07 | 16247167 |
| BnA07 | bnA2541   | 125.2 | BrA07_16254256_301          | BrA07 | 16254256 |
| BnA07 | FITO035B  | 126.1 |                             |       |          |
| BnA07 | bnA2559   | 127.8 | BrA07_17846151_301          | BrA07 | 17846151 |
| BnA07 | bnA2562   | 127.8 | BrA07_18088001_301          | BrA07 | 18088001 |
| BnA07 | bnA0047   | 128.1 | BrA07_18127466_299          | BrA07 | 18127466 |
| BnA08 | bnA5304   | 0     | BrA08_759127_301            | BrA08 | 759127   |
| BnA08 | bnA2760   | 0     | BrA08_914135_259            | BrA08 | 914135   |
| BnA08 | bnA5706   | 5.6   | BrA08_979684_89             | BrA08 | 979684   |
| BnA08 | BoGMS1375 | 8.2   |                             |       |          |
| BnA08 | BGR2      | 12.5  | BrA08_1088421_148           | BrA08 | 1088421  |
| BnA08 | bnA2743   | 15.1  | BrA08_2516101_301           | BrA08 | 2516101  |
| BnA08 | bnA0378   | 15.1  | BrA08_2500830_301           | BrA08 | 2500830  |
| BnA08 | bnA0374   | 15.1  | BrA05_15205515_301          |       |          |
| BnA08 | bnA5876   | 16    | BrA08_2973687_301           | BrA08 | 2973687  |
| BnA08 | bnA5897   | 16    | BrA08_2973687_301           | BrA08 | 2973687  |
| BnA08 | bnA5259   | 16.6  | BrA08_3336709_303           | BrA08 | 3336709  |
| BnA08 | bnA2925   | 18    | BrA08_4781235_301           | BrA08 | 4781235  |
| BnA08 | bnA2713   | 18    | BrA08_5300196_301           | BrA08 | 5300196  |
| BnA08 | bnA4864   | 18    | BrA08_5366755_298           | BrA08 | 5366755  |
| BnA08 | bnA5052   | 18    | BrA08_5490202_302           | BrA08 | 5490202  |
| BnA08 | bnA5705   | 18    | BrA08_5660516_305           | BrA08 | 5660516  |
| BnA08 | bnA2710   | 18    | BrA08_5664464_294           | BrA08 | 5664464  |
| BnA08 | BGR93     | 22.3  | BrA08_5736292_113           | BrA08 | 5736292  |
| BnA08 | BGR69     | 27.6  | BrA08_6151459_136           | BrA08 | 6151459  |
| BnA08 | bnA0319   | 28.7  | BrA08_7064446_301           | BrA08 | 7064446  |
| BnA08 | bnA0221   | 28.7  | BrA08_7092588_301           | BrA08 | 7092588  |
| BnA08 | bnA5411   | 28.7  | BoScaffold000064_262868_307 |       |          |
| BnA08 | bnA2759   | 28.7  | BoScaffold000064_262868_307 |       |          |
| BnA08 | bnA2756   | 28.7  | BrA08_7182928_304           | BrA08 | 7182928  |
| BnA08 | bnA0291   | 28.7  | BoC08_9845211_301           |       |          |
| BnA08 | bnA0217   | 28.7  | BrA08_7232063_301           | BrA08 | 7232063  |
| BnA08 | bnA2495   | 28.7  | BoC04_17492930_266          |       |          |
| BnA08 | bnA1525   | 28.7  | BrScaffold000180_112061_233 |       |          |
| BnA08 | bnA2752   | 28.7  | BrA08_7444486_309           | BrA08 | 7444486  |
| BnA08 | BGR61     | 29.3  | BrA08_7614956_149           | BrA08 | 7614956  |
| BnA08 | bnA1296   | 29.9  | BrA08_7698295_301           | BrA08 | 7698295  |
| BnA08 | bnA2704   | 29.9  | BrA08_7717106_301           | BrA08 | 7717106  |

|       |          |      |                             |       |          |
|-------|----------|------|-----------------------------|-------|----------|
| BnA08 | bna2707  | 30.2 | BoC01_19271492_301          |       |          |
| BnA08 | bna1941  | 30.2 | BrA08_8200184_317           | BrA08 | 8200184  |
| BnA08 | bna2596  | 30.5 | BrA08_8479782_301           | BrA08 | 8479782  |
| BnA08 | bna5303  | 30.5 | BrA08_8495863_301           | BrA08 | 8495863  |
| BnA08 | sS2331BB | 31.1 | BrA08_8588167_116           | BrA08 | 8588167  |
| BnA08 | bna2598  | 31.7 | BrA08_8589463_301           | BrA08 | 8589463  |
| BnA08 | bna2599  | 31.7 | BrA08_8721374_301           | BrA08 | 8721374  |
| BnA08 | BGR1A    | 32.3 | BrA08_8946388_150           | BrA08 | 8946388  |
| BnA08 | bna5221  | 35.3 | BrA08_10186467_301          | BrA08 | 10186467 |
| BnA08 | bna2694  | 35.3 | BrA08_10186467_301          | BrA08 | 10186467 |
| BnA08 | BEN43    | 38.6 | BrA08_10397240_227          | BrA08 | 10397240 |
| BnA08 | BEN48    | 41.3 | BrA08_10398587_201          | BrA08 | 10398587 |
| BnA08 | FITO131  | 41.9 |                             |       |          |
| BnA08 | bna2699  | 43.3 | BrA08_10711075_301          | BrA08 | 10711075 |
| BnA08 | BGR8     | 44.4 | BrA08_11358558_145          | BrA08 | 11358558 |
| BnA08 | BRMS97   | 46.7 | BrA08_14676090_194          | BrA08 | 14676090 |
| BnA08 | bna2686  | 48.4 | BoScaffold000375_162328_301 |       |          |
| BnA08 | bna2687  | 48.4 | BrA08_14729798_301          | BrA08 | 14729798 |
| BnA08 | bna2677  | 49.8 | BrA08_15726752_301          | BrA08 | 15726752 |
| BnA08 | bna5699  | 49.8 | BrA08_15726752_301          | BrA08 | 15726752 |
| BnA08 | bna2672  | 50.7 | BrA08_16033023_308          | BrA08 | 16033023 |
| BnA08 | BEN116   | 51.3 | BrA08_16117222_181          | BrA08 | 16117222 |
| BnA08 | sR3688   | 51.9 | BrA08_16205351_255          | BrA08 | 16205351 |
| BnA08 | bna4993  | 52.5 | BrA08_16248783_301          | BrA08 | 16248783 |
| BnA08 | bna4861  | 55.2 | BrA08_16652551_302          | BrA08 | 16652551 |
| BnA08 | BGO006   | 57.2 | BrA08_16900709_113          | BrA08 | 16900709 |
| BnA08 | bna2662  | 58.1 | BrA08_17000653_297          | BrA08 | 17000653 |
| BnA08 | bna5856  | 58.1 | BrA08_17050908_266          | BrA08 | 17050908 |
| BnA08 | BGO120B  | 59   | BrA08_17125566_219          | BrA08 | 17125566 |
| BnA08 | bna2661  | 59.6 | BrA08_17158805_304          | BrA08 | 17158805 |
| BnA08 | bna2660  | 59.6 | BrA08_17192991_301          | BrA08 | 17192991 |
| BnA08 | bna2659  | 59.6 | BrA08_17297854_301          | BrA08 | 17297854 |
| BnA08 | bna5462  | 60.5 | BrA08_17473735_301          | BrA08 | 17473735 |
| BnA08 | bna2655  | 60.5 | BrA08_17535008_301          | BrA08 | 17535008 |
| BnA08 | bna2654  | 60.5 | BrA08_17579140_301          | BrA08 | 17579140 |
| BnA08 | bna2653  | 60.5 | BrA08_17586824_299          | BrA08 | 17586824 |
| BnA08 | bna2649  | 60.5 |                             |       |          |
| BnA08 | CALSSRA  | 61.1 | BrA08_17620710_145          | BrA08 | 17620710 |
| BnA08 | bna2652  | 61.7 | BrA08_17642831_301          | BrA08 | 17642831 |
| BnA08 | bna2650  | 61.7 | BrA08_17858014_209          | BrA08 | 17858014 |
| BnA08 | bna5404  | 61.7 | BrA08_17858014_209          | BrA08 | 17858014 |
| BnA08 | bna5218  | 67.7 | BrA05_8139038_304           |       |          |
| BnA08 | bna2623  | 67.7 | BrA05_8139038_304           |       |          |
| BnA08 | bna2621  | 68   | BrA05_8223432_300           |       |          |
| BnA08 | bna2619  | 68.9 | BrA05_8318584_302           |       |          |
| BnA09 | BEN332A  | 0    | BrA09_936877_256            | BrA09 | 936877   |
| BnA09 | BEN50B   | 0.9  | BrA09_936928_277            | BrA09 | 936928   |

|       |           |      |                             |       |          |
|-------|-----------|------|-----------------------------|-------|----------|
| BnA09 | BEN50A    | 9.1  | BrA09_936928_277            | BrA09 | 936928   |
| BnA09 | BEN332B   | 9.1  | BrA09_936877_256            | BrA09 | 936877   |
| BnA09 | BN38A     | 10   | BrA09_764538_156            | BrA09 | 764538   |
| BnA09 | bnA2964   | 18.2 | BoC09_285052_304            |       |          |
| BnA09 | BEN55B    | 19.1 | BrA09_2356689_162           | BrA09 | 2356689  |
| BnA09 | FITO135A  | 19.7 |                             |       |          |
| BnA09 | BrGMS725A | 28.6 | BrA09_2302831_166           | BrA09 | 2302831  |
| BnA09 | BnGMS133  | 40.7 | BrA09_4198837_248           | BrA09 | 4198837  |
| BnA09 | BnEMS820A | 47   |                             |       |          |
| BnA09 | sR9447    | 51.3 | BrA09_4281574_349           | BrA09 | 4281574  |
| BnA09 | sN1988    | 51.7 | BrA09_3907955_277           | BrA09 | 3907955  |
| BnA09 | bnA2954   | 52.5 | BrScaffold000178_33738_301  |       |          |
| BnA09 | bnA2953   | 52.8 | BrScaffold000178_39098_249  |       |          |
| BnA09 | bnA2566   | 52.8 | BrA09_4683310_301           | BrA09 | 4683310  |
| BnA09 | bnA5309   | 52.8 | BrA09_4905856_301           | BrA09 | 4905856  |
| BnA09 | bnA5176   | 52.8 | BrA09_4940739_301           | BrA09 | 4940739  |
| BnA09 | bnA5143   | 52.8 | BrA09_5245915_301           | BrA09 | 5245915  |
| BnA09 | bnA2952   | 52.8 | BrA09_5298231_301           | BrA09 | 5298231  |
| BnA09 | bnA2955   | 53.1 | BrA09_4357188_170           | BrA09 | 4357188  |
| BnA09 | bnA0274   | 59.4 | BrA09_6783993_301           | BrA09 | 6783993  |
| BnA09 | bnA2934   | 59.4 | BrA09_6805269_300           | BrA09 | 6805269  |
| BnA09 | bnA0725   | 62.4 | BoScaffold000215_564770_302 |       |          |
| BnA09 | BrGMS316  | 63.5 | BrA09_9108578_310           | BrA09 | 9108578  |
| BnA09 | bnA2920   | 64.4 | BrA09_9447053_301           | BrA09 | 9447053  |
| BnA09 | bnA5873   | 64.4 | BrA09_9452991_253           | BrA09 | 9452991  |
| BnA09 | bnA0498   | 65   | BoC08_1052043_301           |       |          |
| BnA09 | bnA4685   | 65.3 | BrA09_9735024_301           | BrA09 | 9735024  |
| BnA09 | bnA5419   | 65.3 | BrA09_9724424_301           | BrA09 | 9724424  |
| BnA09 | bnA2916   | 65.6 | BrA09_9845178_301           | BrA09 | 9845178  |
| BnA09 | bnA2902   | 65.6 | BrA09_13737008_301          | BrA09 | 13737008 |
| BnA09 | BEN284    | 66.5 | BrA09_13822937_96           | BrA09 | 13822937 |
| BnA09 | Na12-A01  | 66.8 |                             |       |          |
| BnA09 | BnGMS213B | 68.2 | BrA09_13917079_149          | BrA09 | 13917079 |
| BnA09 | BnEMS973  | 70.9 | BrA09_13642334_172          | BrA09 | 13642334 |
| BnA09 | bnA2905   | 72.6 | BrA09_13278233_292          | BrA09 | 13278233 |
| BnA09 | bnA0275   | 72.9 | BrA09_12962010_301          | BrA09 | 12962010 |
| BnA09 | bnA2891   | 72.9 | BrA09_16845654_301          | BrA09 | 16845654 |
| BnA09 | bnA5100   | 73.2 | BrA09_16640161_301          | BrA09 | 16640161 |
| BnA09 | bnA2895   | 73.2 | BrA09_16640161_301          | BrA09 | 16640161 |
| BnA09 | bnA2894   | 73.2 | BrA09_16690925_301          | BrA09 | 16690925 |
| BnA09 | bnA2893   | 73.2 | BrA09_16722763_301          | BrA09 | 16722763 |
| BnA09 | bnA5469   | 73.5 | BrA09_17036026_301          | BrA09 | 17036026 |
| BnA09 | bnA0245   | 73.8 | BrA08_9367918_302           |       |          |
| BnA09 | bnA0244   | 73.8 | BrA08_9420581_229           |       |          |
| BnA09 | bnA0248   | 73.8 | BrA08_9276658_302           |       |          |
| BnA09 | bnA0246   | 73.8 | BrA08_9326518_301           |       |          |
| BnA09 | bnA2887   | 73.8 | BrA07_5758348_284           |       |          |

|       |           |       |                    |       |          |
|-------|-----------|-------|--------------------|-------|----------|
| BnA09 | bnA2313   | 74.1  | BrA06_19739366_301 |       |          |
| BnA09 | bnA5662   | 74.1  | BrA06_19739366_301 |       |          |
| BnA09 | bnA0328   | 74.1  | BrA09_19111915_301 | BrA09 | 19111915 |
| BnA09 | bnA2882   | 74.1  | BrA09_19145713_300 | BrA09 | 19145713 |
| BnA09 | bnA5417   | 74.1  | BrA09_19152171_311 | BrA09 | 19152171 |
| BnA09 | bnA2872   | 74.1  | BrA09_20115127_301 | BrA09 | 20115127 |
| BnA09 | bnA2180   | 74.4  | BrA09_20620287_301 | BrA09 | 20620287 |
| BnA09 | BGR60     | 75.3  | BrA09_20556819_126 | BrA09 | 20556819 |
| BnA09 | CB10022A  | 75.6  |                    |       |          |
| BnA09 | BGR42     | 75.6  |                    |       |          |
| BnA09 | sR9251J   | 76.2  | BrA09_15477898_167 | BrA09 | 15477898 |
| BnA09 | BEN278A   | 76.8  | BoC09_8928998_155  |       |          |
| BnA09 | BrGMS726B | 78.8  |                    |       |          |
| BnA09 | BGR43     | 83.6  | BrA09_23392125_137 | BrA09 | 23392125 |
| BnA09 | BGR23     | 88    | BrA09_24532607_124 | BrA09 | 24532607 |
| BnA09 | BnGMS131  | 88.6  | BrA09_24510113_135 | BrA09 | 24510113 |
| BnA09 | BEN59     | 89.2  | BrA09_23910646_178 | BrA09 | 23910646 |
| BnA09 | BN9A      | 89.8  |                    |       |          |
| BnA09 | BnEMS1144 | 91.8  | BrA09_23895488_281 | BrA09 | 23895488 |
| BnA09 | bnA2861   | 94.1  | BrA09_23920888_299 | BrA09 | 23920888 |
| BnA09 | bnA2859   | 94.1  | BrA09_23717141_301 | BrA09 | 23717141 |
| BnA09 | bnA2862   | 94.1  | BrA09_23926596_301 | BrA09 | 23926596 |
| BnA09 | bnA2865   | 94.4  | BrA09_24105625_301 | BrA09 | 24105625 |
| BnA09 | bnA5289   | 97.7  | BrA05_15805956_301 |       |          |
| BnA09 | bnA4848   | 98    | BrA09_24770365_301 | BrA09 | 24770365 |
| BnA09 | bnA1598   | 98.6  | BrA09_25004211_301 | BrA09 | 25004211 |
| BnA09 | bnA1596   | 98.6  | BrA09_25131434_304 | BrA09 | 25131434 |
| BnA09 | bnA2603   | 98.6  | BrA09_25224371_302 | BrA09 | 25224371 |
| BnA09 | bnA2852   | 98.6  | BrA09_25503885_301 | BrA09 | 25503885 |
| BnA09 | sR12777   | 99.7  | BrA09_24782574_242 | BrA09 | 24782574 |
| BnA09 | BGO179A   | 100.6 | BrA09_25571083_231 | BrA09 | 25571083 |
| BnA09 | BoGMS788  | 100.9 |                    |       |          |
| BnA09 | bnA2825   | 105.2 | BrA09_28241830_308 | BrA09 | 28241830 |
| BnA09 | bnA5141   | 105.2 | BrA09_28241830_308 | BrA09 | 28241830 |
| BnA09 | bnA4867   | 106.1 | BrA09_28910557_301 | BrA09 | 28910557 |
| BnA09 | bnA2820   | 106.1 | BrA09_28706021_301 | BrA09 | 28706021 |
| BnA09 | bnA2815   | 106.7 | BrA09_29101489_302 | BrA09 | 29101489 |
| BnA09 | bnA5468   | 106.7 | BrA09_29310612_301 | BrA09 | 29310612 |
| BnA09 | bnA2810   | 106.7 | BrA09_29348737_293 | BrA09 | 29348737 |
| BnA09 | bnA2809   | 108.1 | BrA09_29454769_300 | BrA09 | 29454769 |
| BnA09 | bnA5306   | 108.1 | BrA09_29496278_301 | BrA09 | 29496278 |
| BnA09 | bnA4828   | 108.1 | BrA03_22478492_271 |       |          |
| BnA09 | BEN84     | 109.5 | BrA09_29791688_229 | BrA09 | 29791688 |
| BnA09 | bnA2807   | 110.9 | BrA09_29820627_301 | BrA09 | 29820627 |
| BnA09 | Na14-B03  | 112.7 |                    |       |          |
| BnA10 | BnGMS249  | 0     |                    |       |          |
| BnA10 | BnGMS9    | 3.1   | BrA10_1812746_129  |       |          |

|       |           |      |                                |       |         |
|-------|-----------|------|--------------------------------|-------|---------|
| BnA10 | BGR66     | 3.4  | BrA10_135760_150               | BrA10 | 135760  |
| BnA10 | bnA3135   | 4.3  | BrA10_284964_301               | BrA10 | 284964  |
| BnA10 | bnA0364   | 4.3  | BrScaffold000123_221988_293    |       |         |
| BnA10 | bnA3106   | 4.3  | BrA01_18702013_301             |       |         |
| BnA10 | bnA3129   | 4.3  | BoC05_2322489_302              |       |         |
| BnA10 | bnA0205   | 4.3  | BrScaffold000291_24321_301     |       |         |
| BnA10 | bnA5551   | 4.3  | BrA02_22682772_310             |       |         |
| BnA10 | bnA1468   | 4.3  | BrA02_22613210_254             |       |         |
| BnA10 | bnA4639   | 4.3  | BrA02_22543533_301             |       |         |
| BnA10 | bnA3134   | 4.3  | BrA10_379786_223               | BrA10 | 379786  |
| BnA10 | bnA5520   | 4.3  | BrScaffold000123_29982_302     |       |         |
| BnA10 | bnA0262   | 4.3  | BrA04_12452903_297             |       |         |
| BnA10 | bnA1469   | 4.3  | BrA02_22693201_301             |       |         |
| BnA10 | bnA2899   | 4.3  | BrScaffold000369_8642_301      |       |         |
| BnA10 | bnA0213   | 4.3  | BrScaffold000123_306903_301    |       |         |
| BnA10 | sR6083    | 5.2  | BrA10_648054_414               | BrA10 | 648054  |
| BnA10 | BEN210    | 5.2  | BrA10_901957_108               | BrA10 | 901957  |
| BnA10 | bnA3127   | 6.1  | BrA10_1513166_189              | BrA10 | 1513166 |
| BnA10 | sORH13B   | 7    | BrA10_1629861_259              | BrA10 | 1629861 |
| BnA10 | BGR71A    | 7    | BrA08_2185800_119              |       |         |
| BnA10 | BoGMS1114 | 7    |                                |       |         |
| BnA10 | BGR64     | 7    |                                |       |         |
| BnA10 | bnA4678   | 7.9  | BrA10_3725683_301              | BrA10 | 3725683 |
| BnA10 | bnA3104   | 7.9  | BrA10_4969953_301              | BrA10 | 4969953 |
| BnA10 | bnA3087   | 7.9  | BrA10_7809191_301              | BrA10 | 7809191 |
| BnA10 | bnA5773   | 8.2  | BoScaffold000034_P1_1356708_56 |       |         |
| BnA10 | bnA1815   | 8.5  | BrA10_6180843_301              | BrA10 | 6180843 |
| BnA10 | bnA1814   | 8.5  | BrA10_6199138_301              | BrA10 | 6199138 |
| BnA10 | BoGMS197A | 9.4  | BrA10_6291918_156              | BrA10 | 6291918 |
| BnA10 | bnA2697   | 10.5 | BrA10_6447037_301              | BrA10 | 6447037 |
| BnA10 | bnA3095   | 11.1 | BrA10_7355531_301              | BrA10 | 7355531 |
| BnA10 | bnA3096   | 11.1 | BoC09_28296469_301             |       |         |
| BnA10 | bnA5771   | 11.1 | BoC09_28296469_301             |       |         |
| BnA10 | bnA3091   | 13.1 | BrA10_7607081_299              | BrA10 | 7607081 |
| BnA10 | bnA3086   | 13.1 | BrA10_7906431_301              | BrA10 | 7906431 |
| BnA10 | bnA5770   | 13.1 | BrA10_7906431_301              | BrA10 | 7906431 |
| BnA10 | bnA4871   | 13.1 | BrA10_8083775_303              | BrA10 | 8083775 |
| BnA10 | bnA4972   | 13.1 | BrA10_8285199_301              | BrA10 | 8285199 |
| BnA10 | bnA0797   | 13.1 | BoC05_4605240_301              |       |         |
| BnA10 | bnA3082   | 13.1 | BrA10_8315472_301              | BrA10 | 8315472 |
| BnA10 | bnA5314   | 13.1 | BrA10_8315472_301              | BrA10 | 8315472 |
| BnA10 | BoGMS1199 | 14.5 |                                |       |         |
| BnA10 | BnEMS1185 | 15.1 | BrA10_8369776_218              | BrA10 | 8369776 |
| BnA10 | bnA3079   | 16   | BrA10_8387305_300              | BrA10 | 8387305 |
| BnA10 | bnA3081   | 16   | BoC09_26000052_293             |       |         |
| BnA10 | bnA3074   | 16   | BrA10_8564289_304              | BrA10 | 8564289 |
| BnA10 | bnA5936   | 16.6 | BrA10_8766904_259              | BrA10 | 8766904 |

|       |           |      |                             |       |          |
|-------|-----------|------|-----------------------------|-------|----------|
| BnA10 | bnA5704   | 16.6 | BrScaffold000123_244680_301 |       |          |
| BnA10 | bnA5889   | 16.6 | BrA10_8766904_259           | BrA10 | 8766904  |
| BnA10 | bnA3069   | 16.6 | BrA10_8857702_301           | BrA10 | 8857702  |
| BnA10 | bnA1597   | 16.6 | BrA09_25072577_299          |       |          |
| BnA10 | bnA5766   | 17.2 | BrA10_9122134_302           | BrA10 | 9122134  |
| BnA10 | bnA5765   | 17.2 | BrA10_9187027_301           | BrA10 | 9187027  |
| BnA10 | bnA3059   | 18.1 | BrA10_9327235_301           | BrA10 | 9327235  |
| BnA10 | bnA5544   | 27.5 | BrA09_31314801_290          |       |          |
| BnA10 | bnA5009   | 39.1 | BrA10_13224157_301          | BrA10 | 13224157 |
| BnA10 | bnA5761   | 40.8 | BrA10_13407917_302          | BrA10 | 13407917 |
| BnA10 | bnA5933   | 40.8 | BrA10_13429404_301          | BrA10 | 13429404 |
| BnA10 | BGO090    | 43.1 | BrA10_13726214_212          | BrA10 | 13726214 |
| BnA10 | BEN312    | 43.1 | BoC09_33883158_221          |       |          |
| BnA10 | bnA4676   | 44   | BoC09_33861997_259          |       |          |
| BnA10 | bnA5019   | 44   | BoC09_33861997_259          |       |          |
| BnA10 | bnA3021   | 44   | BrA10_13734397_303          | BrA10 | 13734397 |
| BnA10 | bnA3020   | 44   | BrA10_13749676_299          | BrA10 | 13749676 |
| BnA10 | bnA5310   | 44.3 | BrA10_13938715_302          | BrA10 | 13938715 |
| BnA10 | bnA3016   | 44.3 | BrA10_13938715_302          | BrA10 | 13938715 |
| BnA10 | bnA3010   | 45.2 | BrA10_14254838_301          | BrA10 | 14254838 |
| BnA10 | bnA5177   | 45.2 | BrA10_14313425_301          | BrA10 | 14313425 |
| BnA10 | bnA3009   | 45.2 | BrA10_14313425_301          | BrA10 | 14313425 |
| BnA10 | bnA5759   | 45.5 | BrA10_14370230_311          | BrA10 | 14370230 |
| BnA10 | bnA3000   | 45.8 | BrA10_14646372_302          | BrA10 | 14646372 |
| BnA10 | bnA2997   | 47.2 | BrA10_14697676_302          | BrA10 | 14697676 |
| BnA10 | bnA5756   | 47.2 | BrA10_14697676_302          | BrA10 | 14697676 |
| BnA10 | bnA2989   | 48.9 | BrA10_15031960_301          | BrA10 | 15031960 |
| BnA10 | bnA2974   | 48.9 | BoC09_37549777_301          |       |          |
| BnA10 | bnA2973   | 48.9 | BrA10_16433391_205          | BrA10 | 16433391 |
| BnA10 | bnA5749   | 48.9 | BrA10_16433391_205          | BrA10 | 16433391 |
| BnA10 | BnEMS1173 | 54.5 | BrA10_15360864_275          | BrA10 | 15360864 |
| BnA10 | BnEMS1156 | 54.8 |                             |       |          |
| BnA10 | bnA5471   | 56.2 | BrA10_15331714_302          | BrA10 | 15331714 |
| BnA10 | bnA0874   | 56.8 | BrA10_16503144_298          | BrA10 | 16503144 |
| BnA10 | bnA1805   | 59.4 | BrA10_17449798_261          | BrA10 | 17449798 |
| BnA10 | bnA3242   | 59.4 | BrA01_9626079_301           |       |          |
| BnA10 | bnA2968   | 59.4 | BrA10_17501817_301          | BrA10 | 17501817 |
| BnA10 | BnGMS175  | 60.3 |                             |       |          |
| BnA10 | BnEMS812  | 64.9 |                             |       |          |
| BnC01 | bnA5649   | 0    | BrA06_2902867_301           | BrA06 | 2902867  |
| BnC01 | bnA2234   | 1.7  | BrA06_2756643_296           | BrA06 | 2756643  |
| BnC01 | BoGMS1303 | 2.8  |                             |       |          |
| BnC01 | bnA4787   | 3.4  | BrA06_2542572_301           | BrA06 | 2542572  |
| BnC01 | bnA2228   | 3.7  | BrA06_2261818_301           | BrA06 | 2261818  |
| BnC01 | bnA2222   | 4.6  | BrA06_1613040_317           | BrA06 | 1613040  |
| BnC01 | bnA5645   | 4.6  | BrA06_1613040_317           | BrA06 | 1613040  |
| BnC01 | bnA2220   | 4.6  | BrA06_1529976_301           | BrA06 | 1529976  |



|       |           |      |                              |       |          |
|-------|-----------|------|------------------------------|-------|----------|
| BnC01 | bnA5093   | 4.6  | BrA06_1480375_301            | BrA06 | 1480375  |
| BnC01 | bnA2219   | 4.6  | BrA06_1480375_301            | BrA06 | 1480375  |
| BnC01 | BEN391B   | 6.6  |                              |       |          |
| BnC01 | BGR16     | 7.5  |                              |       |          |
| BnC01 | BGO160    | 7.8  |                              |       |          |
| BnC01 | bnA5716   | 8.7  | BrA06_26268826_297           |       |          |
| BnC01 | bnA0385   | 8.7  | BrA01_8207233_301            |       |          |
| BnC01 | bnA2770   | 8.7  | BrA06_26268826_297           |       |          |
| BnC01 | bnA3211   | 23   | BoC01_10693467_301           | BoC01 | 10693467 |
| BnC01 | bnA4695   | 23   | BoC09_34391901_189           |       |          |
| BnC01 | bnA3210   | 23   | BoC01_10738704_301           | BoC01 | 10738704 |
| BnC01 | BEN6      | 24.7 | BoC01_10755773_281           | BoC01 | 10755773 |
| BnC01 | bnA3207   | 26.7 | BoC01_10912713_298           | BoC01 | 10912713 |
| BnC01 | bnA5825   | 26.7 | BoC06_31921803_301           |       |          |
| BnC01 | bnA5025   | 26.7 | BoScaffold000024_2832965_301 |       |          |
| BnC01 | bnA5826   | 26.7 | BoC01_10912713_298           | BoC01 | 10912713 |
| BnC01 | bnA3206   | 26.7 | BoC06_31921522_291           |       |          |
| BnC01 | bnA4878   | 26.7 | BoScaffold000024_2832841_302 |       |          |
| BnC01 | bnA3203   | 26.7 | BoC01_11024274_301           | BoC01 | 11024274 |
| BnC01 | bnA3198   | 27.8 | BoC01_11204317_301           | BoC01 | 11204317 |
| BnC01 | bnA3197   | 28.1 | BoC01_11212130_301           | BoC01 | 11212130 |
| BnC01 | bnA3196   | 28.1 | BoC06_35205331_302           |       |          |
| BnC01 | bnA5060   | 28.1 | BoC01_11218340_301           | BoC01 | 11218340 |
| BnC01 | bnA5483   | 28.1 | BoC01_11261704_301           | BoC01 | 11261704 |
| BnC01 | bnA5024   | 28.1 | BoC01_11284149_301           | BoC01 | 11284149 |
| BnC01 | bnA4694   | 28.1 | BoC01_11284149_301           | BoC01 | 11284149 |
| BnC01 | sN9425    | 28.7 | BoC01_11302996_367           | BoC01 | 11302996 |
| BnC01 | bnA2009   | 36.5 | BrA09_6090407_302            |       |          |
| BnC01 | bnA3249   | 36.5 | BoC01_13821490_301           | BoC01 | 13821490 |
| BnC01 | BEN348    | 37.1 | BoC01_14211979_313           | BoC01 | 14211979 |
| BnC01 | bnA0969   | 38   | BoScaffold000127_1253028_301 |       |          |
| BnC01 | bnA3760   | 39.1 | BoScaffold000424_146746_302  |       |          |
| BnC01 | bnA0792   | 39.7 | BoScaffold000127_609513_281  |       |          |
| BnC01 | bnA1032   | 39.7 | BoC04_5903411_257            |       |          |
| BnC01 | bnA3243   | 41.7 | BrA04_2359134_301            |       |          |
| BnC01 | bnA4696   | 41.7 | BoC06_12911807_301           |       |          |
| BnC01 | bnA3247   | 41.7 | BoScaffold000338_130703_302  |       |          |
| BnC01 | bnA3244   | 41.7 | BoC05_9312267_188            |       |          |
| BnC01 | BoGMS622  | 46.5 |                              |       |          |
| BnC01 | Na12-C08  | 50.2 | BrA01_14848800_244           |       |          |
| BnC01 | CB10258   | 51.6 |                              |       |          |
| BnC01 | sS1867A   | 51.9 |                              |       |          |
| BnC01 | BoGMS1246 | 52.2 |                              |       |          |
| BnC01 | bnA3324   | 53.3 | BoC01_14276456_301           | BoC01 | 14276456 |
| BnC01 | bnA3325   | 53.3 | BoC01_14285456_301           | BoC01 | 14285456 |
| BnC01 | bnA5841   | 53.3 | BoC01_14300995_301           | BoC01 | 14300995 |
| BnC01 | bnA3326   | 53.3 | BoC01_14301103_301           | BoC01 | 14301103 |

|       |           |      |                             |       |          |
|-------|-----------|------|-----------------------------|-------|----------|
| BnC01 | bna3327   | 53.3 | BoC01_14319520_264          | BoC01 | 14319520 |
| BnC01 | bna3330   | 53.3 | BoC01_14397348_301          | BoC01 | 14397348 |
| BnC01 | bna3313   | 53.3 | BoScaffold000361_152166_300 |       |          |
| BnC01 | bna3319   | 53.3 | BoScaffold000361_58170_301  |       |          |
| BnC01 | bna3312   | 53.3 | BoScaffold000361_162937_301 |       |          |
| BnC01 | bna5437   | 53.3 | BoC01_14403643_301          | BoC01 | 14403643 |
| BnC01 | bna0891   | 53.3 | BoC01_14522842_301          | BoC01 | 14522842 |
| BnC01 | bna3338   | 53.3 | BoC01_14848536_301          | BoC01 | 14848536 |
| BnC01 | bna3336   | 53.3 | BoC08_10783461_307          |       |          |
| BnC01 | bna3316   | 53.3 | BoScaffold000361_123005_301 |       |          |
| BnC01 | bna0665   | 53.3 | BoC01_16040336_301          | BoC01 | 16040336 |
| BnC01 | bna3320   | 53.3 | BoScaffold000361_48863_301  |       |          |
| BnC01 | bna0532   | 53.3 | BoScaffold000337_4413_301   |       |          |
| BnC01 | bna3335   | 53.3 | BoC01_16340725_301          | BoC01 | 16340725 |
| BnC01 | bna3310   | 53.4 | BoScaffold000361_218671_301 |       |          |
| BnC01 | bna0701   | 53.5 | BoScaffold000237_639353_294 |       |          |
| BnC01 | bna3314   | 53.6 | BoScaffold000361_140793_301 |       |          |
| BnC01 | bna0832   | 53.7 | BoC01_17141760_301          | BoC01 | 17141760 |
| BnC01 | bna2979   | 54.3 | BoC04_10825273_249          |       |          |
| BnC01 | bna5239   | 56.3 | BoC01_21703665_246          | BoC01 | 21703665 |
| BnC01 | bna0574   | 57.5 | BoC01_29077523_285          | BoC01 | 29077523 |
| BnC01 | BoGMS1399 | 59.8 |                             |       |          |
| BnC01 | bna0941   | 60.9 | BoC01_30797471_301          | BoC01 | 30797471 |
| BnC01 | bna3342   | 60.9 | BoC01_31074192_301          | BoC01 | 31074192 |
| BnC01 | bna5879   | 60.9 | BoC01_31086172_301          | BoC01 | 31086172 |
| BnC01 | bna3343   | 60.9 | BoC01_31149562_301          | BoC01 | 31149562 |
| BnC01 | sN3523R   | 61.2 | BoC01_31581658_199          | BoC01 | 31581658 |
| BnC01 | bna0553   | 61.8 | BoC01_31930694_301          | BoC01 | 31930694 |
| BnC01 | bna0988   | 63.2 | BoC03_24421151_301          |       |          |
| BnC01 | bna3357   | 63.2 | BoC03_50713788_301          |       |          |
| BnC01 | bna3350   | 63.2 | BoC01_32625067_301          | BoC01 | 32625067 |
| BnC01 | BoGMS561  | 67.5 | BoC01_36186383_144          | BoC01 | 36186383 |
| BnC01 | BEN410    | 70.2 | BoC01_37885135_241          | BoC01 | 37885135 |
| BnC01 | BEN32B    | 70.6 | BoC01_38372637_153          | BoC01 | 38372637 |
| BnC01 | bna1286   | 71.4 | BrA01_27902747_299          |       |          |
| BnC01 | bna0878   | 71.4 | BoC07_23218661_179          |       |          |
| BnC01 | bna3369   | 71.4 | BrA01_28250786_301          |       |          |
| BnC01 | bna1298   | 71.4 | BrA01_28260995_301          |       |          |
| BnC01 | BRAS074A  | 74.8 | BrA01_28424481_120          |       |          |
| BnC02 | BrGMS231B | 0    |                             |       |          |
| BnC02 | BGO054    | 1    |                             |       |          |
| BnC02 | bna5066   | 1.5  | BrA07_20511170_301          | BrA07 | 20511170 |
| BnC02 | bna2584   | 2    | BrA07_21529099_298          | BrA07 | 21529099 |
| BnC02 | bna5215   | 2    | BrA07_21637773_301          | BrA07 | 21637773 |
| BnC02 | bna2585   | 2    | BoC07_943422_239            |       |          |
| BnC02 | bna2588   | 2    | BrA07_21918751_301          | BrA07 | 21918751 |
| BnC02 | BrGMS231A | 2.3  |                             |       |          |

|       |           |      |                                 |       |          |
|-------|-----------|------|---------------------------------|-------|----------|
| BnC02 | bn3407    | 17.6 | BoC02_11048047_301              |       |          |
| BnC02 | BEN425    | 25.7 |                                 |       |          |
| BnC02 | MR52a     | 31.2 | BoC02_6520290_134               | BoC02 | 6520290  |
| BnC02 | BnEMS1119 | 34.5 | BoC02_7359570_209               | BoC02 | 7359570  |
| BnC02 | BrGMS268  | 34.5 | BoC02_7359632_296               | BoC02 | 7359632  |
| BnC02 | BRAS083   | 34.5 | BoC02_7413861_156               | BoC02 | 7413861  |
| BnC02 | BEN134    | 35.1 | BoC02_8463131_197               | BoC02 | 8463131  |
| BnC02 | bn3442    | 36.2 | BoC02_8604252_305               | BoC02 | 8604252  |
| BnC02 | bn3458    | 36.5 | BrA02_5592528_299               |       |          |
| BnC02 | bn3529    | 36.5 | BoC02_5955002_301               |       |          |
| BnC02 | bn3456    | 36.5 | BrA02_5301560_301               |       |          |
| BnC02 | bn3461    | 36.5 | BrA02_5924413_148               |       |          |
| BnC02 | bn3532    | 36.5 | BrA02_6228686_200               |       |          |
| BnC02 | bn32583   | 39.5 | BrA07_21437273_301              |       |          |
| BnC02 | BEN396    | 42.2 |                                 |       |          |
| BnC02 | BoGMS328  | 42.8 |                                 |       |          |
| BnC02 | sN3761A   | 43.4 | BoC02_9227135_179               | BoC02 | 9227135  |
| BnC02 | bn3385    | 44.3 | BoScaffold000344_348629_302     |       |          |
| BnC02 | bn3379    | 44.3 | BoC06_26117133_301              |       |          |
| BnC02 | bn3371    | 44.3 | BoC06_25893091_286              |       |          |
| BnC02 | bn3375    | 44.3 | BoC06_26016799_299              |       |          |
| BnC02 | bn3383    | 44.3 | BrA10_7152347_268               |       |          |
| BnC02 | bn3380    | 44.4 | BoC06_26158817_188              |       |          |
| BnC02 | bn3387    | 44.5 | BoScaffold000024_78841_304      |       |          |
| BnC02 | bn3389    | 44.6 | BoScaffold000024_319346_301     |       |          |
| BnC02 | bn3386    | 44.7 | BoScaffold000024_11794_301      |       |          |
| BnC02 | bn30551   | 44.7 | BoC02_10311145_301              | BoC02 | 10311145 |
| BnC02 | bn3413    | 44.7 | BoC02_10734477_301              | BoC02 | 10734477 |
| BnC02 | bn3409    | 44.7 | BoC01_28896212_301              |       |          |
| BnC02 | bn3410    | 44.7 | BoC02_10914216_301              | BoC02 | 10914216 |
| BnC02 | bn3392    | 44.7 | BoC02_11087706_230              | BoC02 | 11087706 |
| BnC02 | bn3384    | 44.7 | BoScaffold000344_317376_304     |       |          |
| BnC02 | bn34963   | 44.7 | BoScaffold000024_58713_299      |       |          |
| BnC02 | bn34700   | 44.7 | BoC02_11100426_239              | BoC02 | 11100426 |
| BnC02 | bn3522    | 45.5 | BoScaffold000001_P2_243108_301  |       |          |
| BnC02 | bn3525    | 45.5 | BrA02_8653202_301               |       |          |
| BnC02 | bn3524    | 45.5 | BoScaffold000001_P2_214096_301  |       |          |
| BnC02 | bn3520    | 45.5 | BoScaffold000001_P2_334963_301  |       |          |
| BnC02 | bn3519    | 45.6 | BoScaffold000001_P2_358314_297  |       |          |
| BnC02 | bn3517    | 45.7 | BoScaffold000001_P2_387136_301  |       |          |
| BnC02 | bn3592    | 47.4 | BoScaffold000001_P2_669898_302  |       |          |
| BnC02 | bn3505    | 48   | BoScaffold000001_P2_1178512_301 |       |          |
| BnC02 | bn34791   | 48   | BoScaffold000001_P2_714220_301  |       |          |
| BnC02 | bn3508    | 48   | BoScaffold000001_P2_629586_302  |       |          |
| BnC02 | bn3510    | 48   | BoScaffold000001_P2_541721_301  |       |          |
| BnC02 | OI13-G05  | 49.4 |                                 |       |          |
| BnC02 | BEN281A   | 51.3 | BoC02_11649330_219              | BoC02 | 11649330 |

|       |           |       |                    |       |          |
|-------|-----------|-------|--------------------|-------|----------|
| BnC02 | Na12-H09  | 52.5  | BrA02_11624278_128 |       |          |
| BnC02 | O109-A06A | 53.5  | BoC02_26800345_89  |       |          |
| BnC02 | bn3862    | 55.7  | BoC02_16785367_301 | BoC02 | 16785367 |
| BnC02 | bn3863    | 55.7  | BoC02_16849058_301 | BoC02 | 16849058 |
| BnC02 | bn3864    | 55.7  | BoC02_17022146_301 | BoC02 | 17022146 |
| BnC02 | bn1423    | 56    | BrA02_13167839_301 |       |          |
| BnC02 | BGO146    | 80.6  | BrA02_15287651_259 | BrA02 | 15287651 |
| BnC02 | bn1223    | 81.8  | BoC05_1773758_301  |       |          |
| BnC02 | bn1439    | 82.7  | BrA02_15879592_265 | BrA02 | 15879592 |
| BnC02 | bn1440    | 82.7  | BrA02_16588127_301 | BrA02 | 16588127 |
| BnC02 | bn0309    | 82.8  | BoC02_24685579_301 |       |          |
| BnC02 | bn5051    | 82.9  | BrA05_9241979_297  |       |          |
| BnC02 | bn5545    | 82.9  | BoC02_24759788_303 |       |          |
| BnC02 | bn2134    | 83.2  | BrA05_9166879_314  |       |          |
| BnC02 | bn0619    | 83.2  | BrA05_6407217_297  |       |          |
| BnC02 | bn2135    | 83.5  | BrA05_9080490_301  |       |          |
| BnC02 | bn2136    | 83.5  | BrA05_9054410_303  |       |          |
| BnC02 | BGR58     | 84.6  | BoC02_33628790_105 |       |          |
| BnC02 | bn4836    | 84.9  | BrA02_19401694_301 | BrA02 | 19401694 |
| BnC02 | bn5035    | 84.9  | BrA02_19401939_301 | BrA02 | 19401939 |
| BnC02 | bn5209    | 84.9  | BrA02_19573717_301 | BrA02 | 19573717 |
| BnC02 | bn2268    | 84.9  | BrA02_19573717_301 | BrA02 | 19573717 |
| BnC02 | bn1455    | 84.9  | BrA02_19646538_297 | BrA02 | 19646538 |
| BnC02 | bn5627    | 85.2  | BoC02_33293315_168 |       |          |
| BnC02 | BEN296    | 87.5  | BrA02_22857073_152 | BrA02 | 22857073 |
| BnC02 | bn5548    | 88.1  | BoC02_36430470_302 |       |          |
| BnC02 | bn1472    | 89.2  | BrA02_22157503_301 | BrA02 | 22157503 |
| BnC02 | bn5552    | 89.2  | BrA02_22157503_301 | BrA02 | 22157503 |
| BnC02 | bn1473    | 89.2  | BrA02_22357115_301 | BrA02 | 22357115 |
| BnC02 | bn5554    | 90.1  | BrA02_23362692_299 | BrA02 | 23362692 |
| BnC02 | BRMS-026  | 93.1  | BrA02_24682175_228 | BrA02 | 24682175 |
| BnC02 | bn5556    | 95.1  | BrA02_24201837_301 | BrA02 | 24201837 |
| BnC02 | bn1490    | 95.4  | BrA02_24269285_301 | BrA02 | 24269285 |
| BnC02 | bn1494    | 95.4  | BrA02_24580861_304 | BrA02 | 24580861 |
| BnC02 | bn1088    | 96.3  | BrA02_25898411_314 | BrA02 | 25898411 |
| BnC02 | bn1087    | 96.6  | BrA02_26014141_254 | BrA02 | 26014141 |
| BnC02 | bn0664    | 97.2  | BrA02_26034248_221 | BrA02 | 26034248 |
| BnC02 | bn1086    | 97.2  | BrA02_26034636_301 | BrA02 | 26034636 |
| BnC02 | bn0053    | 97.2  | BrA02_26164634_301 | BrA02 | 26164634 |
| BnC02 | BEN14     | 98.1  | BrA02_26265807_241 | BrA02 | 26265807 |
| BnC02 | bn1080    | 100.1 | BrA02_27246329_302 | BrA02 | 27246329 |
| BnC03 | BnEMS824  | 0     |                    |       |          |
| BnC03 | BnEMS1171 | 0.9   | BoC03_56984210_644 | BoC03 | 56984210 |
| BnC03 | bn0488    | 2     | BoC03_56831583_301 | BoC03 | 56831583 |
| BnC03 | BGR89     | 4     | BoC03_55727445_158 | BoC03 | 55727445 |
| BnC03 | BoGMS1153 | 4.9   |                    |       |          |
| BnC03 | bn0578    | 38.2  | BoC06_40640551_301 |       |          |

|       |           |       |                             |       |          |
|-------|-----------|-------|-----------------------------|-------|----------|
| BnC03 | BoGMS576  | 40.5  |                             |       |          |
| BnC03 | Na12-E02B | 42.4  | BrA03_7953653_103           |       |          |
| BnC03 | BoGMS693  | 44.9  |                             |       |          |
| BnC03 | BRAS120   | 44.9  | BoC03_8598996_193           | BoC03 | 8598996  |
| BnC03 | bna0584   | 49.5  | BoC03_8917659_299           | BoC03 | 8917659  |
| BnC03 | bna0109   | 54.1  | BoC03_9403365_301           | BoC03 | 9403365  |
| BnC03 | O110-E05  | 56.1  | BoC03_9847453_95            | BoC03 | 9847453  |
| BnC03 | bna3238   | 58.5  | BoC03_10671466_301          | BoC03 | 10671466 |
| BnC03 | bna3235   | 60.8  | BoC03_10826083_300          | BoC03 | 10826083 |
| BnC03 | bna3234   | 60.8  | BoC03_10837267_301          | BoC03 | 10837267 |
| BnC03 | bna5830   | 60.8  | BoC03_10837868_301          | BoC03 | 10837868 |
| BnC03 | bna3232   | 60.8  | BoC03_10876501_299          | BoC03 | 10876501 |
| BnC03 | bna0420   | 61.7  | BoScaffold000417_72597_301  |       |          |
| BnC03 | bna0815   | 62    | BoC03_13119401_301          | BoC03 | 13119401 |
| BnC03 | bna3642   | 62.6  | BoC03_14248590_301          | BoC03 | 14248590 |
| BnC03 | CB10057   | 63.7  | BoC03_14249960_197          | BoC03 | 14249960 |
| BnC03 | BRAS051A  | 63.7  |                             |       |          |
| BnC03 | sNRA56    | 63.7  | BoC03_14457833_251          | BoC03 | 14457833 |
| BnC03 | bna4752   | 64.8  | BoC03_14715730_223          | BoC03 | 14715730 |
| BnC03 | BRAS087A  | 65.9  | BoC03_16290437_171          | BoC03 | 16290437 |
| BnC03 | BRAS005   | 65.9  | BoC03_16290458_196          | BoC03 | 16290458 |
| BnC03 | bna3694   | 67    | BoScaffold000445_93975_301  |       |          |
| BnC03 | bna3641   | 67    | BoC04_4765967_301           |       |          |
| BnC03 | bna3695   | 67    | BoScaffold000445_115904_301 |       |          |
| BnC03 | bna1672   | 67    | BrA03_12402499_301          |       |          |
| BnC03 | bna3691   | 67    | BoC03_16510429_301          | BoC03 | 16510429 |
| BnC03 | bna3697   | 67.3  | BoC03_17189721_301          | BoC03 | 17189721 |
| BnC03 | bna3698   | 67.3  | BoC03_17198073_301          | BoC03 | 17198073 |
| BnC03 | bna0810   | 68.2  | BoC03_17384693_301          | BoC03 | 17384693 |
| BnC03 | bna0527   | 68.5  | BoC03_18059121_301          | BoC03 | 18059121 |
| BnC03 | BnGMS153  | 71.8  | BoC03_19715716_184          | BoC03 | 19715716 |
| BnC03 | bna3665   | 72.9  | BoC03_19898731_291          | BoC03 | 19898731 |
| BnC03 | FITO007.2 | 76.8  |                             |       |          |
| BnC03 | bna3725   | 79.5  | BoScaffold000040_247857_301 |       |          |
| BnC03 | bna4359   | 79.5  | BoScaffold000040_345382_301 |       |          |
| BnC03 | bna3728   | 79.8  | BoScaffold000040_77369_301  |       |          |
| BnC03 | bna3726   | 79.8  | BoScaffold000040_222077_301 |       |          |
| BnC03 | BrGMS556  | 85.1  | BoC03_21360451_159          | BoC03 | 21360451 |
| BnC03 | BEN78     | 90.4  | BoC03_26376496_139          | BoC03 | 26376496 |
| BnC03 | BnGMS584A | 93.1  | BoC03_27306726_219          | BoC03 | 27306726 |
| BnC03 | bna0400   | 94    | BoC03_27365297_301          | BoC03 | 27365297 |
| BnC03 | Na10-E02C | 96.8  |                             |       |          |
| BnC03 | Na10-E02B | 100.3 |                             |       |          |
| BnC03 | Na12-G05  | 101.7 |                             |       |          |
| BnC03 | bna0842   | 102.6 | BoC07_28315359_306          |       |          |
| BnC03 | bna0989   | 102.6 | BoC07_27998777_301          |       |          |
| BnC03 | bna0711   | 102.6 | BoScaffold000389_119417_304 |       |          |

|       |          |       |                                |       |          |
|-------|----------|-------|--------------------------------|-------|----------|
| BnC03 | bnA0545  | 102.9 | BoC03_29474486_301             | BoC03 | 29474486 |
| BnC03 | bnA0960  | 103.5 | BoC03_29818084_301             | BoC03 | 29818084 |
| BnC04 | bnA4772  | 0     | BoScaffold000479_44720_309     |       |          |
| BnC04 | BEN337   | 2.3   | BoC04_28531_179                | BoC04 | 28531    |
| BnC04 | BnEMS634 | 2.3   | BoC04_28573_164                | BoC04 | 28573    |
| BnC04 | bnA0741  | 2.6   | BoC04_34927_301                | BoC04 | 34927    |
| BnC04 | bnA3881  | 2.6   | BoScaffold000492_80177_301     |       |          |
| BnC04 | bnA3880  | 2.6   | BoScaffold000492_36021_301     |       |          |
| BnC04 | BRAS072  | 2.9   |                                |       |          |
| BnC04 | BEN266   | 2.9   | BoC04_121523_205               | BoC04 | 121523   |
| BnC04 | BGO140   | 7.8   | BoC04_2985740_184              | BoC04 | 2985740  |
| BnC04 | BoGMS876 | 8.1   |                                |       |          |
| BnC04 | sS2277   | 8.1   | BoC04_2065086_215              | BoC04 | 2065086  |
| BnC04 | bnA5435  | 10.1  | BoC03_21757372_301             |       |          |
| BnC04 | bnA3898  | 11.2  | BoScaffold000152_P2_118199_301 |       |          |
| BnC04 | bnA3896  | 11.5  | BoC04_7283093_289              | BoC04 | 7283093  |
| BnC04 | bnA3895  | 11.5  | BoC04_7107888_301              | BoC04 | 7107888  |
| BnC04 | bnA3893  | 11.5  | BoC04_7053518_301              | BoC04 | 7053518  |
| BnC04 | bnA3890  | 12.1  | BoC04_6765723_301              | BoC04 | 6765723  |
| BnC04 | bnA3889  | 12.1  | BoC04_6755490_300              | BoC04 | 6755490  |
| BnC04 | bnA3886  | 12.1  | BoC04_6692801_301              | BoC04 | 6692801  |
| BnC04 | bnA3885  | 12.1  | BoC04_6681467_301              | BoC04 | 6681467  |
| BnC04 | bnA3884  | 12.1  | BoC04_6662671_301              | BoC04 | 6662671  |
| BnC04 | BGR83    | 15.4  | BoC04_4863957_119              | BoC04 | 4863957  |
| BnC04 | bnA3901  | 16.3  | BoC04_4853652_301              | BoC04 | 4853652  |
| BnC04 | bnA3902  | 16.3  | BoC04_4832311_301              | BoC04 | 4832311  |
| BnC04 | bnA3903  | 16.3  | BoC04_4811011_301              | BoC04 | 4811011  |
| BnC04 | bnA3904  | 16.3  | BoC04_4788675_301              | BoC04 | 4788675  |
| BnC04 | bnA3905  | 16.3  | BoC04_4687761_301              | BoC04 | 4687761  |
| BnC04 | bnA3910  | 16.3  | BoC04_4503191_230              | BoC04 | 4503191  |
| BnC04 | bnA2154  | 19.9  | BrA05_5043649_301              |       |          |
| BnC04 | bnA5967  | 23.2  | BoC04_20851795_301             | BoC04 | 20851795 |
| BnC04 | BGO141   | 24.6  | BoC04_20034307_263             | BoC04 | 20034307 |
| BnC04 | BoGMS560 | 25.2  | BoC04_34176660_276             |       |          |
| BnC04 | bnA0695  | 30.8  | BoScaffold000024_972317_297    |       |          |
| BnC04 | BEN269   | 35.7  | BoC04_19590343_175             |       |          |
| BnC04 | bnA3769  | 36.6  | BoScaffold000498_71526_216     |       |          |
| BnC04 | bnA4000  | 47.7  | BoC01_25489245_300             |       |          |
| BnC04 | bnA4001  | 48    | BoC01_25461049_301             |       |          |
| BnC04 | bnA4718  | 48    | BoC04_29837685_301             | BoC04 | 29837685 |
| BnC04 | BEN239   | 50    | BoC04_30860617_210             | BoC04 | 30860617 |
| BnC04 | BGO041   | 50    | BoC04_30860620_207             | BoC04 | 30860620 |
| BnC04 | bnA4135  | 50.3  | BoC04_31011812_301             | BoC04 | 31011812 |
| BnC04 | CB10196  | 50.9  | BoC04_33057690_247             | BoC04 | 33057690 |
| BnC04 | BEN30A   | 52.3  | BoC04_36133841_239             | BoC04 | 36133841 |
| BnC04 | bnA4009  | 53.4  | BoC03_20863405_301             |       |          |
| BnC04 | bnA4019  | 53.7  | BoC04_36163611_301             | BoC04 | 36163611 |

|       |           |       |                            |       |          |
|-------|-----------|-------|----------------------------|-------|----------|
| BnC04 | bn4022    | 54.6  | BoC04_36389682_301         | BoC04 | 36389682 |
| BnC04 | bn4032    | 56    | BoC04_37567682_301         | BoC04 | 37567682 |
| BnC04 | bn4033    | 56.7  | BoC04_37601346_301         | BoC04 | 37601346 |
| BnC04 | bn4038    | 57.4  | BoC04_37790278_301         | BoC04 | 37790278 |
| BnC04 | bn45613   | 57.4  | BoC04_37966586_296         | BoC04 | 37966586 |
| BnC04 | BEN260    | 57.7  | BoC04_38004702_204         | BoC04 | 38004702 |
| BnC04 | bn4042    | 58    | BoC04_38020170_301         | BoC04 | 38020170 |
| BnC04 | bn45200   | 58    | BrA04_17055673_303         |       |          |
| BnC04 | bn42011   | 58    | BrA04_17309194_302         |       |          |
| BnC04 | bn4044    | 58    | BoC04_38084313_301         | BoC04 | 38084313 |
| BnC04 | bn4046    | 58    | BoC04_38310490_301         | BoC04 | 38310490 |
| BnC04 | BEN28     | 58.3  | BoC04_38625818_244         | BoC04 | 38625818 |
| BnC04 | BEN420    | 58.3  |                            |       |          |
| BnC04 | BEN330A   | 60.9  | BoC04_39009491_117         | BoC04 | 39009491 |
| BnC04 | bn42013   | 63.9  | BoC04_39112360_301         | BoC04 | 39112360 |
| BnC04 | Na12-E05A | 64.2  | BoC04_39335346_159         | BoC04 | 39335346 |
| BnC04 | bn43657   | 64.5  | BoC08_15576714_301         |       |          |
| BnC04 | bn45088   | 64.5  | BrA04_18941625_301         |       |          |
| BnC04 | bn43659   | 64.5  | BoC04_39408421_301         | BoC04 | 39408421 |
| BnC04 | bn45901   | 65.4  | BoScaffold000383_71931_301 |       |          |
| BnC04 | bn43654   | 71.4  | BoC04_39447484_301         | BoC04 | 39447484 |
| BnC04 | Ol10-B01C | 77.4  | BoC04_39600479_169         | BoC04 | 39600479 |
| BnC04 | bn4048    | 77.7  | BoC04_39634651_301         | BoC04 | 39634651 |
| BnC04 | bn4050    | 77.7  | BoC04_39746095_301         | BoC04 | 39746095 |
| BnC04 | BEN387    | 79.7  | BoC04_39865802_148         | BoC04 | 39865802 |
| BnC04 | bn4051    | 81.7  | BoC04_39944696_258         | BoC04 | 39944696 |
| BnC04 | bn4054    | 81.7  | BoC04_40220984_301         | BoC04 | 40220984 |
| BnC04 | BGO044    | 82    | BoC04_40264415_217         | BoC04 | 40264415 |
| BnC04 | BEN376    | 85    | BoC04_40441062_146         | BoC04 | 40441062 |
| BnC04 | BEN216    | 88.3  | BoC04_40450483_103         | BoC04 | 40450483 |
| BnC04 | BnEMS439B | 89.7  | BrA04_18048955_207         |       |          |
| BnC04 | BEN313A   | 91.4  | BoC04_40800903_129         | BoC04 | 40800903 |
| BnC04 | Na12-E05B | 104.7 | BoC04_39335346_159         |       |          |
| BnC04 | Ol10-B01A | 105.1 | BoC04_39600479_169         |       |          |
| BnC04 | bn41518   | 109.9 | BrA04_18370211_301         | BrA04 | 18370211 |
| BnC04 | bn41519   | 109.9 | BrA04_18248518_214         | BrA04 | 18248518 |
| BnC04 | bn41522   | 110.8 | BrA04_18097253_288         | BrA04 | 18097253 |
| BnC04 | Ol10-B01B | 110.8 | BoC04_39600479_169         |       |          |
| BnC04 | bn45246   | 111.1 | BrA04_17577550_301         | BrA04 | 17577550 |
| BnC04 | BrGMS426  | 119   | BoC04_37779242_205         |       |          |
| BnC04 | BEN30B    | 124.7 | BoC04_36133841_239         |       |          |
| BnC04 | bn4017    | 125.3 | BoC04_35968371_301         |       |          |
| BnC04 | bn41987   | 125.3 | BrA04_15411549_301         | BrA04 | 15411549 |
| BnC04 | bn41816   | 125.6 | BrA04_14899563_301         | BrA04 | 14899563 |
| BnC04 | bn41975   | 125.6 | BrA04_14885528_301         | BrA04 | 14885528 |
| BnC04 | bn4013    | 125.6 | BoC04_35723468_301         |       |          |
| BnC04 | bn41973   | 125.6 | BrA04_14639857_301         | BrA04 | 14639857 |

|       |          |       |                                |       |          |
|-------|----------|-------|--------------------------------|-------|----------|
| BnC04 | bnA5286  | 125.6 | BrA04_14588034_301             | BrA04 | 14588034 |
| BnC04 | bnA1965  | 125.9 | BrA04_13571365_291             | BrA04 | 13571365 |
| BnC04 | bnA1964  | 125.9 | BrA04_13541330_301             | BrA04 | 13541330 |
| BnC04 | bnA5383  | 125.9 | BrA04_13490597_299             | BrA04 | 13490597 |
| BnC04 | bnA1963  | 125.9 | BrA04_13435626_298             | BrA04 | 13435626 |
| BnC04 | bnA1983  | 125.9 | BoC04_32509105_285             |       |          |
| BnC04 | bnA1984  | 125.9 | BoC04_32547519_302             |       |          |
| BnC04 | bnA1985  | 125.9 | BrA04_13293395_301             | BrA04 | 13293395 |
| BnC04 | BGR55    | 126.8 | BrA04_13660464_142             | BrA04 | 13660464 |
| BnC04 | OI11-B05 | 129.8 |                                |       |          |
| BnC04 | bnA1956  | 134.7 | BrA04_12982228_301             | BrA04 | 12982228 |
| BnC04 | bnA1958  | 135.3 | BrA04_12775106_301             | BrA04 | 12775106 |
| BnC04 | bnA5039  | 135.3 | BrA04_12759591_267             | BrA04 | 12759591 |
| BnC04 | BnEMS843 | 138.3 | BoC04_30578742_303             |       |          |
| BnC04 | bnA1930  | 138.9 | BrA04_12051217_211             | BrA04 | 12051217 |
| BnC04 | bnA1929  | 139.2 | BrA04_11857893_301             | BrA04 | 11857893 |
| BnC04 | bnA5601  | 139.5 | BrA04_11641375_301             | BrA04 | 11641375 |
| BnC04 | bnA1927  | 140.1 | BrA04_11512229_301             | BrA04 | 11512229 |
| BnC04 | bnA1925  | 140.1 | BrA04_11436981_301             | BrA04 | 11436981 |
| BnC04 | bnA5959  | 140.7 | BoScaffold000008_P1_232056_301 |       |          |
| BnC04 | bnA4796  | 140.7 | BoScaffold000008_P1_233001_301 |       |          |
| BnC04 | bnA5542  | 140.7 | BrA03_24870135_301             |       |          |
| BnC04 | bnA1433  | 140.7 | BrA03_24869598_301             |       |          |
| BnC04 | bnA1923  | 140.7 | BrA04_10941413_232             | BrA04 | 10941413 |
| BnC04 | BGO078   | 141.6 | BrA04_10745608_134             | BrA04 | 10745608 |
| BnC04 | sN2025   | 143   | BrA04_10382393_654             | BrA04 | 10382393 |
| BnC04 | bnA1913  | 147.3 | BrA04_9930221_301              | BrA04 | 9930221  |
| BnC04 | bnA5598  | 147.3 | BrA04_9866051_301              | BrA04 | 9866051  |
| BnC04 | bnA1912  | 147.3 | BrA04_9866051_301              | BrA04 | 9866051  |
| BnC04 | bnA0161  | 147.3 | BoScaffold000053_1407745_301   |       |          |
| BnC04 | bnA0128  | 147.3 | BrA04_9829689_301              | BrA04 | 9829689  |
| BnC04 | bnA5199  | 147.9 | BrA04_9543819_301              | BrA04 | 9543819  |
| BnC04 | bnA1910  | 147.9 | BrA04_9531877_301              | BrA04 | 9531877  |
| BnC04 | bnA1906  | 148.8 | BoScaffold000301_484897_216    |       |          |
| BnC04 | bnA1905  | 148.8 | BrA04_8788332_264              | BrA04 | 8788332  |
| BnC04 | bnA1903  | 149.9 | BrA04_8431313_305              | BrA04 | 8431313  |
| BnC04 | BGR71B   | 150.5 |                                |       |          |
| BnC04 | BEN95    | 151.6 | BrA04_8694754_115              | BrA04 | 8694754  |
| BnC04 | BEN229   | 152.5 | BoC04_29308814_232             |       |          |
| BnC04 | bnA0006  | 153.6 | BrA04_7342568_290              | BrA04 | 7342568  |
| BnC05 | BGR49    | 0     | BoC05_27137863_144             |       |          |
| BnC05 | bnA3300  | 1.1   | BoScaffold000237_761486_300    |       |          |
| BnC05 | bnA0559  | 1.1   | BoC05_26882248_301             |       |          |
| BnC05 | bnA4794  | 4.7   | BoC04_13352367_301             |       |          |
| BnC05 | bnA0448  | 6.1   | BoScaffold000450_12080_301     |       |          |
| BnC05 | BnGMS208 | 7     |                                |       |          |
| BnC05 | BnGMS198 | 7     |                                |       |          |



|       |           |       |                               |       |          |
|-------|-----------|-------|-------------------------------|-------|----------|
| BnC05 | sS2131    | 7.9   | BoC05_8854465_174             |       |          |
| BnC05 | BoGMS319  | 16.8  | BoC05_7007360_227             | BoC05 | 7007360  |
| BnC05 | bn4117    | 19.8  | BoC05_13932622_288            | BoC05 | 13932622 |
| BnC05 | bn4125    | 19.8  | BoC05_29708580_318            |       |          |
| BnC05 | bn4124    | 19.8  | BoC05_15224000_302            | BoC05 | 15224000 |
| BnC05 | bn4127    | 19.8  | BoC05_15339888_301            | BoC05 | 15339888 |
| BnC05 | bn4289    | 21.5  | BoC05_16473116_245            | BoC05 | 16473116 |
| BnC05 | bn4288    | 21.5  | BoC05_16496431_301            | BoC05 | 16496431 |
| BnC05 | bn40194   | 21.8  | BoC09_19095369_301            |       |          |
| BnC05 | Na12-C01  | 22.7  | BoC05_16975819_85             | BoC05 | 16975819 |
| BnC05 | bn4065    | 26.6  | BoScaffold000333_229916_301   |       |          |
| BnC05 | bn4072    | 26.9  | BoC05_25517337_305            | BoC05 | 25517337 |
| BnC05 | bn4073    | 27.2  | BoC05_25556828_227            | BoC05 | 25556828 |
| BnC05 | bn4075    | 27.5  | BoC05_25710318_302            | BoC05 | 25710318 |
| BnC05 | bn4076    | 28.1  | BoC05_25894318_301            | BoC05 | 25894318 |
| BnC05 | bn43414   | 28.1  | BoC02_10603202_301            |       |          |
| BnC05 | BEN81     | 29    | BoC05_25942418_171            | BoC05 | 25942418 |
| BnC05 | bn4078    | 29.9  | BoC05_25948119_305            | BoC05 | 25948119 |
| BnC05 | bn4079    | 29.9  | BoC05_26000822_301            | BoC05 | 26000822 |
| BnC05 | bn4080    | 30.2  | BoC05_26021073_301            | BoC05 | 26021073 |
| BnC05 | bn4082    | 33.5  | BoC05_3205578_301             | BoC05 | 3205578  |
| BnC05 | bn4083    | 34.6  | BoC05_3151125_301             | BoC05 | 3151125  |
| BnC05 | BEN363    | 35.5  | BoC05_3150464_236             | BoC05 | 3150464  |
| BnC05 | BGO151    | 35.5  | BoC05_3149393_257             | BoC05 | 3149393  |
| BnC05 | bn4084    | 37.8  | BoC05_2997517_301             | BoC05 | 2997517  |
| BnC05 | bn4085    | 38.4  | BoScaffold000087_P1_63592_301 |       |          |
| BnC05 | bn4089    | 41.7  | BoC05_2576267_301             | BoC05 | 2576267  |
| BnC05 | bn4090    | 41.7  | BoC05_2553972_301             | BoC05 | 2553972  |
| BnC05 | bn4093    | 42.3  | BoC05_2440345_300             | BoC05 | 2440345  |
| BnC05 | bn4094    | 42.3  | BoC05_2416377_281             | BoC05 | 2416377  |
| BnC05 | sORH13A   | 43.7  |                               |       |          |
| BnC05 | bn4056    | 49.7  | BoC05_395352_301              | BoC05 | 395352   |
| BnC05 | bn4057    | 49.7  | BoC05_283542_301              | BoC05 | 283542   |
| BnC05 | BEN140    | 81    |                               |       |          |
| BnC05 | bn40623   | 81.9  | BoC09_9601331_299             |       |          |
| BnC05 | BoGMS1561 | 82.5  |                               |       |          |
| BnC05 | FITO114   | 86.4  |                               |       |          |
| BnC05 | bn43301   | 86.7  | BoScaffold000249_566822_301   |       |          |
| BnC05 | bn44610   | 90    | BoScaffold000364_152113_301   |       |          |
| BnC05 | BEN285    | 111.1 | BrA05_2348320_166             |       |          |
| BnC05 | BrGMS387  | 113.5 | BrA05_1577399_319             | BrA05 | 1577399  |
| BnC05 | bn42197   | 114.6 | BrA05_1492477_301             | BrA05 | 1492477  |
| BnC05 | bn42192   | 115.5 | BrA05_2109698_321             | BrA05 | 2109698  |
| BnC05 | bn42187   | 116.1 | BrA05_2287965_301             | BrA05 | 2287965  |
| BnC05 | bn45640   | 116.1 | BrA05_2402280_301             | BrA05 | 2402280  |
| BnC05 | bn40023   | 116.7 | BrA05_2534365_297             | BrA05 | 2534365  |
| BnC05 | bn42182   | 116.7 | BrA05_2604626_246             | BrA05 | 2604626  |

|       |           |       |                            |       |          |
|-------|-----------|-------|----------------------------|-------|----------|
| BnC05 | bnA2181   | 117.3 | BrA05_2718163_301          | BrA05 | 2718163  |
| BnC05 | bnA0371   | 117.3 | BrA05_2752010_301          | BrA05 | 2752010  |
| BnC05 | bnA2179   | 119.6 | BrA05_3043046_300          | BrA05 | 3043046  |
| BnC05 | bnA2178   | 120.5 | BrA05_3135216_162          | BrA05 | 3135216  |
| BnC05 | bnA5639   | 120.8 | BrA05_3324028_301          | BrA05 | 3324028  |
| BnC05 | bnA2174   | 120.8 | BrA05_3550306_265          | BrA05 | 3550306  |
| BnC05 | bnA2173   | 120.8 | BrA05_3610261_301          | BrA05 | 3610261  |
| BnC05 | bnA5453   | 120.8 | BrA05_3615531_301          | BrA05 | 3615531  |
| BnC05 | bnA5205   | 121.1 | BrA05_3782985_299          | BrA05 | 3782985  |
| BnC05 | BEN211    | 122.8 | BrA05_5098813_154          | BrA05 | 5098813  |
| BnC05 | BRAS063   | 124.2 | BrA05_3298798_243          |       |          |
| BnC05 | BnEMS1036 | 124.2 | BrA05_3202272_265          |       |          |
| BnC05 | BrGMS351  | 124.5 | BrA05_3298816_227          |       |          |
| BnC05 | BGR88B    | 132.7 | BrA05_18227120_147         |       |          |
| BnC05 | BGR51     | 133.8 | BrA05_16460698_150         |       |          |
| BnC05 | BrGMS124  | 133.8 | BoC05_19788361_158         |       |          |
| BnC05 | Na10-E02A | 134.1 | BrA06_16875254_125         |       |          |
| BnC05 | BnEMS1072 | 134.2 | BrA06_20995022_200         |       |          |
| BnC05 | Na12-E01  | 134.3 |                            |       |          |
| BnC05 | bnA2138   | 135.4 | BrA05_7855910_301          | BrA05 | 7855910  |
| BnC05 | bnA2120   | 135.4 | BrA05_9646616_251          | BrA05 | 9646616  |
| BnC05 | bnA5629   | 135.4 | BrA05_9900847_301          | BrA05 | 9900847  |
| BnC05 | bnA2118   | 135.7 | BrA05_10292928_301         | BrA05 | 10292928 |
| BnC05 | bnA2124   | 135.7 | BrA05_11106780_301         | BrA05 | 11106780 |
| BnC05 | bnA2128   | 135.7 | BrA05_11607194_301         | BrA05 | 11607194 |
| BnC05 | bnA2069   | 136   | BoC05_8041058_241          |       |          |
| BnC05 | bnA1165   | 136.3 | BoC09_24054236_321         |       |          |
| BnC05 | bnA5130   | 136.3 | BrA05_11714048_301         | BrA05 | 11714048 |
| BnC05 | bnA2131   | 136.3 | BrA05_11718716_303         | BrA05 | 11718716 |
| BnC05 | bnA2133   | 136.3 | BrA05_11840091_301         | BrA05 | 11840091 |
| BnC05 | bnA2116   | 136.6 | BrA05_11945153_301         | BrA05 | 11945153 |
| BnC05 | bnA2115   | 136.6 | BrA05_11980424_301         | BrA05 | 11980424 |
| BnC05 | bnA2114   | 136.6 | BrA05_11984544_301         | BrA05 | 11984544 |
| BnC05 | bnA2113   | 136.6 | BrA05_12011855_301         | BrA05 | 12011855 |
| BnC05 | bnA2122   | 137.2 | BrA01_11993737_299         |       |          |
| BnC05 | bnA5870   | 137.8 | BrA05_12033088_301         | BrA05 | 12033088 |
| BnC05 | bnA2111   | 137.8 | BrA05_12052721_301         | BrA05 | 12052721 |
| BnC05 | bnA2107   | 137.8 | BrA05_12307753_301         | BrA05 | 12307753 |
| BnC05 | bnA0668   | 137.8 | BoC03_9427817_301          |       |          |
| BnC05 | bnA2105   | 137.8 | BrA05_12426734_301         | BrA05 | 12426734 |
| BnC05 | bnA2104   | 137.8 | BrA05_12457820_301         | BrA05 | 12457820 |
| BnC05 | bnA0354   | 137.8 | BrA05_12838818_301         | BrA05 | 12838818 |
| BnC05 | bnA1120   | 137.8 | BrScaffold000280_11257_302 |       |          |
| BnC05 | bnA2061   | 137.8 | BrA05_13227028_301         | BrA05 | 13227028 |
| BnC05 | bnA0342   | 137.8 | BrA05_13301566_206         | BrA05 | 13301566 |
| BnC05 | bnA2751   | 138.1 | BrA08_1336839_301          |       |          |
| BnC05 | bnA5620   | 138.4 | BrA05_13538777_301         | BrA05 | 13538777 |

|       |          |       |                             |       |          |
|-------|----------|-------|-----------------------------|-------|----------|
| BnC05 | bna2071  | 138.4 | BrA05_13880226_296          | BrA05 | 13880226 |
| BnC05 | bna0253  | 138.4 | BrScaffold000201_41824_301  |       |          |
| BnC05 | bna0252  | 138.4 | BrA02_22725096_301          |       |          |
| BnC05 | bna2075  | 138.4 | BrA05_14029064_301          | BrA05 | 14029064 |
| BnC05 | bna2060  | 138.4 | BrScaffold004022_427_301    |       |          |
| BnC05 | BGR50    | 139.3 | BoC05_13100763_143          |       |          |
| BnC05 | bna2076  | 140.2 | BrA05_14040757_301          | BrA05 | 14040757 |
| BnC05 | bna2077  | 140.2 | BrA05_14155289_301          | BrA05 | 14155289 |
| BnC05 | bna2082  | 140.2 | BrA05_14435311_301          | BrA05 | 14435311 |
| BnC05 | bna2083  | 140.2 | BrA05_14444029_301          | BrA05 | 14444029 |
| BnC05 | bna2085  | 140.2 | BrA05_14595356_301          | BrA05 | 14595356 |
| BnC05 | bna5012  | 140.2 | BrA05_14740842_277          | BrA05 | 14740842 |
| BnC05 | bna2087  | 140.2 | BrA05_14742565_301          | BrA05 | 14742565 |
| BnC05 | bna2091  | 140.2 | BrA05_15013435_301          | BrA05 | 15013435 |
| BnC05 | bna5625  | 140.2 | BrA05_15086181_301          | BrA05 | 15086181 |
| BnC05 | bna2066  | 140.2 | BrA05_15356777_304          | BrA05 | 15356777 |
| BnC05 | bna2057  | 140.5 | BrA05_16835720_305          | BrA05 | 16835720 |
| BnC05 | bna2056  | 140.5 | BrA05_16844353_301          | BrA05 | 16844353 |
| BnC05 | bna4801  | 141.1 | BrA05_17757971_229          | BrA05 | 17757971 |
| BnC05 | bna2375  | 141.1 | BrA05_17832691_301          | BrA05 | 17832691 |
| BnC05 | bna5017  | 141.1 | BrA05_17913610_301          | BrA05 | 17913610 |
| BnC05 | bna5619  | 141.4 | BrA05_18458288_258          | BrA05 | 18458288 |
| BnC05 | bna4729  | 141.4 | BoScaffold000509_10901_301  |       |          |
| BnC05 | bna2049  | 141.7 | BrA05_18654178_301          | BrA05 | 18654178 |
| BnC05 | bna4798  | 141.7 | BoC05_23892687_300          |       |          |
| BnC05 | bna0769  | 141.7 | BoC05_23817122_301          |       |          |
| BnC05 | bna2048  | 141.7 | BrA05_18778891_301          | BrA05 | 18778891 |
| BnC05 | bna1162  | 142.3 | BoScaffold000106_777496_318 |       |          |
| BnC05 | bna2045  | 144   | BrA05_21047756_279          | BrA05 | 21047756 |
| BnC05 | bna5617  | 144.6 | BrA05_21102199_301          | BrA05 | 21102199 |
| BnC05 | bna2044  | 144.6 | BrA05_21107331_301          | BrA05 | 21107331 |
| BnC05 | bna2043  | 144.6 | BrA05_21481144_301          | BrA05 | 21481144 |
| BnC05 | bna2042  | 144.9 | BrA05_21631356_301          | BrA05 | 21631356 |
| BnC05 | bna5011  | 145.2 | BrA05_21646834_301          | BrA05 | 21646834 |
| BnC05 | BGR70    | 145.2 | BrA05_21844706_150          | BrA05 | 21844706 |
| BnC06 | BEN374B  | 0     | BoC07_1042174_213           |       |          |
| BnC06 | bna5689  | 9     | BrA07_21961835_303          | BrA07 | 21961835 |
| BnC06 | bna2589  | 9     | BrA07_22034312_301          | BrA07 | 22034312 |
| BnC06 | bna2592  | 9     | BrA07_22193291_301          | BrA07 | 22193291 |
| BnC06 | bna2593  | 9     | BoC07_302532_301            | BoC07 | 302532   |
| BnC06 | BEN335   | 9     | BoC07_30944062_119          |       |          |
| BnC06 | bna2587  | 9.3   | BoC07_771518_295            | BoC07 | 771518   |
| BnC06 | BEN374A  | 11.3  | BoC07_1042174_213           | BoC07 | 1042174  |
| BnC06 | BnEMS994 | 13.3  | BoC07_1198475_240           | BoC07 | 1198475  |
| BnC06 | bna2577  | 15    | BrA07_20501932_294          |       |          |
| BnC06 | bna1012  | 15    | BoC07_2451947_301           | BoC07 | 2451947  |
| BnC06 | bna2570  | 15    | BrA07_19430864_301          |       |          |

|       |           |      |                    |       |          |
|-------|-----------|------|--------------------|-------|----------|
| BnC06 | bnA5863   | 15   | BoC01_10128342_270 |       |          |
| BnC06 | bnA5410   | 15   | BoC01_25355578_299 |       |          |
| BnC06 | bnA2747   | 15   | BoC01_25355779_301 |       |          |
| BnC06 | bnA0395   | 15   | BrA07_21174257_235 |       |          |
| BnC06 | bnA5135   | 15.3 | BrA07_18992968_301 |       |          |
| BnC06 | BEN228    | 18.6 | BoC07_2509216_254  | BoC07 | 2509216  |
| BnC06 | bnA3900   | 18.6 | BoC04_4881367_301  |       |          |
| BnC06 | BoGMS1186 | 18.6 |                    |       |          |
| BnC06 | bnA4754   | 18.6 | BoC07_2693719_260  | BoC07 | 2693719  |
| BnC06 | bnA5046   | 18.6 | BrA07_17488642_228 |       |          |
| BnC06 | BnEMS82B  | 22.5 | BoC07_2965046_191  | BoC07 | 2965046  |
| BnC06 | bnA4145   | 23.4 | BoC07_3320152_301  | BoC07 | 3320152  |
| BnC06 | bnA4144   | 23.4 | BoC07_3469180_301  | BoC07 | 3469180  |
| BnC06 | BnEMS1124 | 23.7 | BoC07_3642978_334  | BoC07 | 3642978  |
| BnC06 | bnA4116   | 24   | BoC07_4899883_227  | BoC07 | 4899883  |
| BnC06 | BEN16     | 24   | BoC07_4905589_121  | BoC07 | 4905589  |
| BnC06 | bnA4115   | 24.3 | BoC07_4914531_301  | BoC07 | 4914531  |
| BnC06 | BGO055    | 24.6 | BoC07_7490142_210  | BoC07 | 7490142  |
| BnC06 | bnA4793   | 24.9 | BoC07_7504465_225  | BoC07 | 7504465  |
| BnC06 | BEN271    | 24.9 | BoC07_7556363_123  | BoC07 | 7556363  |
| BnC06 | BGO056    | 25.8 | BoC07_7556363_123  | BoC07 | 7556363  |
| BnC06 | bnA4106   | 26.7 | BoC07_7558675_301  | BoC07 | 7558675  |
| BnC06 | bnA4901   | 26.7 | BoC07_7711919_297  | BoC07 | 7711919  |
| BnC06 | BEN327    | 26.7 | BoC07_8457556_255  | BoC07 | 8457556  |
| BnC06 | BEN341A   | 27   | BoC07_8535142_132  | BoC07 | 8535142  |
| BnC06 | Ap1c 5pr  | 27.3 |                    |       |          |
| BnC06 | BEN341B   | 30.8 | BoC07_8535142_132  | BoC07 | 8535142  |
| BnC06 | bnA0669   | 31.9 | BoC07_8913646_301  | BoC07 | 8913646  |
| BnC06 | bnA2558   | 32.8 | BrA07_17705637_301 | BrA07 | 17705637 |
| BnC06 | bnA2553   | 32.8 | BrA07_17388386_301 | BrA07 | 17388386 |
| BnC06 | bnA0114   | 34.8 | BrA07_16767833_301 | BrA07 | 16767833 |
| BnC06 | bnA0175   | 34.8 | BrA07_16759938_301 | BrA07 | 16759938 |
| BnC06 | bnA4782   | 34.8 | BrA07_16758082_301 | BrA07 | 16758082 |
| BnC06 | bnA0113   | 34.8 | BrA07_16757315_301 | BrA07 | 16757315 |
| BnC06 | bnA0046   | 34.8 | BrA07_16755651_301 | BrA07 | 16755651 |
| BnC06 | bnA0174   | 34.9 | BrA07_16728857_301 | BrA07 | 16728857 |
| BnC06 | bnA4952   | 35   | BrA07_16722238_285 | BrA07 | 16722238 |
| BnC06 | bnA0017   | 35.1 | BrA07_16701988_301 | BrA07 | 16701988 |
| BnC06 | bnA0034   | 35.2 | BrA07_16695280_301 | BrA07 | 16695280 |
| BnC06 | bnA2545   | 35.3 | BrA07_16686772_302 | BrA07 | 16686772 |
| BnC06 | bnA2544   | 35.4 | BrA07_16677737_301 | BrA07 | 16677737 |
| BnC06 | bnA0133   | 35.7 | BrA07_16558893_301 | BrA07 | 16558893 |
| BnC06 | bnA4781   | 36   | BrA07_16100952_301 | BrA07 | 16100952 |
| BnC06 | bnA0033   | 36   | BrA07_16100357_301 | BrA07 | 16100357 |
| BnC06 | bnA4780   | 36   | BrA07_16099540_301 | BrA07 | 16099540 |
| BnC06 | bnA0016   | 36   | BrA07_16095439_301 | BrA07 | 16095439 |
| BnC06 | bnA2539   | 36   | BrA07_16095439_301 | BrA07 | 16095439 |

|       |           |      |                            |       |          |
|-------|-----------|------|----------------------------|-------|----------|
| BnC06 | bna0171   | 36   | BrA07_16089881_301         | BrA07 | 16089881 |
| BnC06 | bna0068   | 36   | BrA07_16070666_301         | BrA07 | 16070666 |
| BnC06 | bna0015   | 36   | BrA07_16040715_301         | BrA07 | 16040715 |
| BnC06 | bna2538   | 36   | BrA07_15931600_301         | BrA07 | 15931600 |
| BnC06 | bna2528   | 36.3 | BrA07_15058904_301         | BrA07 | 15058904 |
| BnC06 | FITO035A  | 36.3 |                            |       |          |
| BnC06 | bna0470   | 36.3 | BoC07_9423305_301          |       |          |
| BnC06 | bna2525   | 36.3 | BrA07_14970124_301         | BrA07 | 14970124 |
| BnC06 | BnEMS82A  | 36.9 | BoC07_32508597_207         |       |          |
| BnC06 | BnGMS205  | 38.8 |                            |       |          |
| BnC06 | bna0148   | 40.4 | BoC07_35677613_301         | BoC07 | 35677613 |
| BnC06 | bna4278   | 40.4 | BoScaffold000356_98841_301 |       |          |
| BnC06 | bna1006   | 40.4 | BoC06_33759140_301         |       |          |
| BnC06 | bna0009   | 40.4 | BoC07_35675639_301         | BoC07 | 35675639 |
| BnC06 | OI12-E03B | 41.5 | BoC07_35576050_117         | BoC07 | 35576050 |
| BnC06 | BEN185    | 42.6 |                            |       |          |
| BnC06 | bna4285   | 42.6 | BoC07_35504618_268         | BoC07 | 35504618 |
| BnC06 | bna1052   | 42.6 | BoC07_34184488_301         | BoC07 | 34184488 |
| BnC06 | bna0650   | 42.6 | BoC07_33598518_273         | BoC07 | 33598518 |
| BnC06 | bna2529   | 42.6 | BoC07_32751398_304         | BoC07 | 32751398 |
| BnC06 | FITO095   | 42.6 |                            |       |          |
| BnC06 | BGO156A   | 42.6 | BoC07_32557010_172         | BoC07 | 32557010 |
| BnC06 | bna4628   | 42.6 | BoC04_10754934_301         |       |          |
| BnC06 | BGR99B    | 48.3 | BoC07_31854860_133         | BoC07 | 31854860 |
| BnC06 | bna0867   | 58.6 | BoC07_29771104_301         | BoC07 | 29771104 |
| BnC06 | OI10-F09  | 60   | BoC07_28931103_119         | BoC07 | 28931103 |
| BnC06 | bna0892   | 60.3 | BoC05_7077119_301          |       |          |
| BnC06 | bna4154   | 61.2 | BoC07_27663436_303         | BoC07 | 27663436 |
| BnC06 | bna4157   | 61.2 | BoC07_27513541_301         | BoC07 | 27513541 |
| BnC06 | bna0656   | 63.2 | BoC07_16839511_301         |       |          |
| BnC06 | BnGMS147B | 63.2 | BrA07_13588712_232         |       |          |
| BnC06 | bna4965   | 64.1 | BoC07_16180589_301         |       |          |
| BnC07 | BoGMS1032 | 0    |                            |       |          |
| BnC07 | bna4251   | 2.7  | BoC06_2074938_285          | BoC06 | 2074938  |
| BnC07 | bna4726   | 2.7  | BoC06_2100997_301          | BoC06 | 2100997  |
| BnC07 | bna4252   | 2.7  | BoC06_2114909_301          | BoC06 | 2114909  |
| BnC07 | bna4254   | 2.7  | BoC06_2200019_301          | BoC06 | 2200019  |
| BnC07 | bna4255   | 2.7  | BoC06_2247440_301          | BoC06 | 2247440  |
| BnC07 | bna4906   | 2.7  | BoC06_2275925_301          | BoC06 | 2275925  |
| BnC07 | bna4258   | 2.7  | BoC06_2366458_283          | BoC06 | 2366458  |
| BnC07 | bna4261   | 2.7  | BoC06_2471432_305          | BoC06 | 2471432  |
| BnC07 | bna4263   | 2.7  | BoC06_2490783_301          | BoC06 | 2490783  |
| BnC07 | Na12-F03  | 3    | BoC06_2511274_275          | BoC06 | 2511274  |
| BnC07 | bna4266   | 3.3  | BoC06_2778576_301          | BoC06 | 2778576  |
| BnC07 | CB10297   | 3.9  | BoC06_2953737_265          | BoC06 | 2953737  |
| BnC07 | sNRH63    | 4.2  |                            |       |          |
| BnC07 | BRAS019   | 4.2  |                            |       |          |

|       |           |     |                            |       |          |
|-------|-----------|-----|----------------------------|-------|----------|
| BnC07 | bnA0935   | 4.5 | BoC06_3403068_301          | BoC06 | 3403068  |
| BnC07 | BN25C2    | 5.4 | BoC06_4577757_142          | BoC06 | 4577757  |
| BnC07 | bnA0901   | 5.7 | BoC06_4584719_301          | BoC06 | 4584719  |
| BnC07 | Na10-C01B | 6   | BoC06_5650953_186          | BoC06 | 5650953  |
| BnC07 | CB10217   | 6   | BoC06_5914112_163          | BoC06 | 5914112  |
| BnC07 | bnA4195   | 6.9 | BoScaffold000410_40826_301 |       |          |
| BnC07 | bnA3967   | 6.9 | BoC06_9908054_301          | BoC06 | 9908054  |
| BnC07 | bnA4293   | 6.9 | BoC06_12451594_301         | BoC06 | 12451594 |
| BnC07 | bnA4194   | 6.9 | BoScaffold000410_19634_301 |       |          |
| BnC07 | bnA3768   | 6.9 | BoC07_24416978_301         |       |          |
| BnC07 | bnA0459   | 6.9 | BoC06_12726319_301         | BoC06 | 12726319 |
| BnC07 | bnA4189   | 7.2 | BoC06_13553142_301         | BoC06 | 13553142 |
| BnC07 | bnA4188   | 7.2 | BoC06_13579405_301         | BoC06 | 13579405 |
| BnC07 | bnA4186   | 7.2 | BoC06_13624868_301         | BoC06 | 13624868 |
| BnC07 | bnA4903   | 7.2 | BoC06_13687812_193         | BoC06 | 13687812 |
| BnC07 | bnA4184   | 7.2 | BoC06_13765187_302         | BoC06 | 13765187 |
| BnC07 | bnA4182   | 7.2 | BoC02_25633759_301         |       |          |
| BnC07 | bnA4183   | 7.2 | BoC06_13809881_301         | BoC06 | 13809881 |
| BnC07 | bnA4181   | 7.2 | BoC06_13872424_301         | BoC06 | 13872424 |
| BnC07 | bnA4180   | 7.2 | BoC06_13886682_301         | BoC06 | 13886682 |
| BnC07 | bnA4179   | 7.2 | BoC06_13994462_301         | BoC06 | 13994462 |
| BnC07 | bnA4177   | 7.2 | BoC06_14027102_301         | BoC06 | 14027102 |
| BnC07 | bnA4176   | 7.2 | BoC06_14046580_301         | BoC06 | 14046580 |
| BnC07 | bnA4174   | 7.2 | BoC06_14122045_301         | BoC06 | 14122045 |
| BnC07 | bnA4172   | 7.2 | BoC06_14197030_301         | BoC06 | 14197030 |
| BnC07 | bnA4169   | 7.2 | BoC06_14278577_301         | BoC06 | 14278577 |
| BnC07 | bnA4902   | 7.2 | BoC06_14314918_301         | BoC06 | 14314918 |
| BnC07 | bnA4167   | 7.2 | BoC06_14324578_301         | BoC06 | 14324578 |
| BnC07 | bnA4165   | 7.2 | BoC06_14627525_301         | BoC06 | 14627525 |
| BnC07 | bnA4191   | 7.2 | BoScaffold000960_1800_301  |       |          |
| BnC07 | bnA4164   | 7.2 | BoC06_14723271_301         | BoC06 | 14723271 |
| BnC07 | bnA4162   | 7.5 | BoC06_14770118_301         | BoC06 | 14770118 |
| BnC07 | bnA4161   | 7.5 | BoC06_14804908_300         | BoC06 | 14804908 |
| BnC07 | bnA4226   | 7.5 | BoC06_14828402_301         | BoC06 | 14828402 |
| BnC07 | bnA4724   | 7.5 | BrA10_3001069_301          |       |          |
| BnC07 | bnA4227   | 7.5 | BoC06_14860771_301         | BoC06 | 14860771 |
| BnC07 | bnA4228   | 7.5 | BoC06_14888151_301         | BoC06 | 14888151 |
| BnC07 | bnA4229   | 7.5 | BoC06_14926384_301         | BoC06 | 14926384 |
| BnC07 | bnA0721   | 7.5 | BoC03_39349623_301         |       |          |
| BnC07 | bnA4232   | 7.5 | BoC06_15015127_301         | BoC06 | 15015127 |
| BnC07 | bnA4234   | 7.5 | BoC06_15054584_301         | BoC06 | 15054584 |
| BnC07 | bnA4235   | 7.5 | BoC06_15072864_301         | BoC06 | 15072864 |
| BnC07 | bnA4236   | 7.5 | BoC06_15105978_301         | BoC06 | 15105978 |
| BnC07 | bnA4808   | 7.5 | BoC06_15175329_301         | BoC06 | 15175329 |
| BnC07 | sN0706    | 7.8 | BoC06_15240254_357         | BoC06 | 15240254 |
| BnC07 | bnA4907   | 8.1 | BrScaffold000239_42138_304 |       |          |
| BnC07 | bnA4238   | 8.1 | BoC06_15360330_301         | BoC06 | 15360330 |

|       |           |      |                           |       |          |
|-------|-----------|------|---------------------------|-------|----------|
| BnC07 | bn4240    | 8.1  | BoC06_15620608_301        | BoC06 | 15620608 |
| BnC07 | bn4242    | 8.1  | BoC06_15665403_301        | BoC06 | 15665403 |
| BnC07 | bn4245    | 8.1  | BoC06_15739861_301        | BoC06 | 15739861 |
| BnC07 | bn4246    | 8.1  | BoC06_15748825_301        | BoC06 | 15748825 |
| BnC07 | bn4275    | 8.1  | BoC06_15756688_271        | BoC06 | 15756688 |
| BnC07 | bn4248    | 8.1  | BoC06_15878853_301        | BoC06 | 15878853 |
| BnC07 | bn4247    | 8.1  | BoC06_15801680_301        | BoC06 | 15801680 |
| BnC07 | bn4262    | 8.1  |                           |       |          |
| BnC07 | bn41003   | 8.7  | BoC08_23087748_239        | BoC08 | 23087748 |
| BnC07 | bn4196    | 8.7  | BoC08_23737763_301        | BoC08 | 23737763 |
| BnC07 | bn4198    | 9.3  | BoC08_25975058_301        | BoC08 | 25975058 |
| BnC07 | bn4199    | 9.3  | BoC08_26108471_301        | BoC08 | 26108471 |
| BnC07 | bn4200    | 9.3  | BoC08_26146753_247        | BoC08 | 26146753 |
| BnC07 | bn4201    | 9.3  | BoScaffold000719_1655_301 |       |          |
| BnC07 | bn4202    | 9.3  | BoC08_26204631_301        | BoC08 | 26204631 |
| BnC07 | bn4203    | 9.3  | BoC08_26244524_301        | BoC08 | 26244524 |
| BnC07 | bn40731   | 15.6 | BoC06_24097329_299        | BoC06 | 24097329 |
| BnC07 | bn41041   | 19.5 | BoC06_28284306_301        | BoC06 | 28284306 |
| BnC07 | bn40474   | 20.9 | BoC09_25920840_231        |       |          |
| BnC07 | bn41055   | 23.2 | BoC06_31734439_276        | BoC06 | 31734439 |
| BnC07 | sR12156B  | 23.8 | BoC06_31818111_169        | BoC06 | 31818111 |
| BnC07 | bn4304    | 25.2 | BoC06_32533026_301        | BoC06 | 32533026 |
| BnC07 | bn4908    | 25.2 | BoC06_32566425_301        | BoC06 | 32566425 |
| BnC07 | OI10-D03D | 26.8 |                           |       |          |
| BnC07 | BGO169    | 29.2 | BoC06_34086182_244        | BoC06 | 34086182 |
| BnC07 | bn4313    | 30.4 | BrA06_21862527_241        |       |          |
| BnC07 | bn4315    | 30.4 | BoC06_34137121_183        | BoC06 | 34137121 |
| BnC07 | BEN119    | 50.6 | BrA06_18641591_209        |       |          |
| BnC07 | BEN206    | 60.4 | BrA06_21505620_333        |       |          |
| BnC07 | bn4344    | 68.6 | BoC06_37800109_301        | BoC06 | 37800109 |
| BnC07 | bn4346    | 68.6 | BoC04_31242317_293        |       |          |
| BnC07 | bn4377    | 71.9 | BoC06_39441907_301        | BoC06 | 39441907 |
| BnC07 | bn4376    | 71.9 | BoC06_39464119_301        | BoC06 | 39464119 |
| BnC07 | bn4399    | 74.9 | BoC06_43166079_281        | BoC06 | 43166079 |
| BnC07 | bn4394    | 74.9 | BoC06_43427426_301        | BoC06 | 43427426 |
| BnC07 | bn4393    | 74.9 | BoC06_43445980_301        | BoC06 | 43445980 |
| BnC07 | bn4390    | 75.2 | BoC06_43509340_301        | BoC06 | 43509340 |
| BnC07 | bn4388    | 75.2 | BoC06_43624619_301        | BoC06 | 43624619 |
| BnC07 | bn4385    | 75.8 | BoC06_43770397_301        | BoC06 | 43770397 |
| BnC07 | bn4384    | 75.8 | BoC06_43790514_301        | BoC06 | 43790514 |
| BnC07 | bn43405   | 76.7 | BoC06_44323786_278        | BoC06 | 44323786 |
| BnC07 | bn43404   | 76.7 | BoC06_44356546_277        | BoC06 | 44356546 |
| BnC07 | bn43403   | 76.7 | BoC06_44410862_275        | BoC06 | 44410862 |
| BnC07 | bn43402   | 76.7 | BoC06_44427102_264        | BoC06 | 44427102 |
| BnC07 | bn43395   | 76.7 | BoC06_44570444_256        | BoC06 | 44570444 |
| BnC07 | BoGMS373  | 77   |                           |       |          |
| BnC08 | bn4401    | 0    | BoC08_1857108_292         |       |          |

|       |           |      |                             |       |          |
|-------|-----------|------|-----------------------------|-------|----------|
| BnC08 | bnA0848   | 1.4  | BoC04_1469322_301           |       |          |
| BnC08 | BEN69     | 5    | BoC08_8369969_220           | BoC08 | 8369969  |
| BnC08 | BoGMS351  | 8.3  |                             |       |          |
| BnC08 | BGO178    | 8.3  | BoC08_18707834_252          |       |          |
| BnC08 | BoGMS38   | 8.3  | BrA08_4023460_168           |       |          |
| BnC08 | bnA3766   | 10.6 | BoC08_10732119_233          | BoC08 | 10732119 |
| BnC08 | bnA3765   | 10.6 | BoC08_10784717_302          | BoC08 | 10784717 |
| BnC08 | bnA3764   | 10.6 | BoC08_10796441_269          | BoC08 | 10796441 |
| BnC08 | bnA4711   | 10.6 | BoC08_10837538_302          | BoC08 | 10837538 |
| BnC08 | sS2331BA  | 12.3 | BoC08_10903912_116          | BoC08 | 10903912 |
| BnC08 | bnA3762   | 12.9 | BoC08_10999144_301          | BoC08 | 10999144 |
| BnC08 | bnA3761   | 12.9 | BoC08_11122588_301          | BoC08 | 11122588 |
| BnC08 | bnA3767   | 14   | BoC08_11203620_301          | BoC08 | 11203620 |
| BnC08 | bnA0141   | 14   | BoC08_11329429_300          | BoC08 | 11329429 |
| BnC08 | BGR1B     | 14.6 | BoC08_11779145_169          | BoC08 | 11779145 |
| BnC08 | BEN189B   | 14.6 | BoC08_14236962_229          | BoC08 | 14236962 |
| BnC08 | bnA0435   | 15.2 | BoC08_14452136_301          | BoC08 | 14452136 |
| BnC08 | bnA0836   | 15.5 | BoC07_6327946_301           |       |          |
| BnC08 | bnA4404   | 22.9 | BoC08_18448987_301          | BoC08 | 18448987 |
| BnC08 | bnA0071   | 22.9 | BoScaffold000394_170509_304 |       |          |
| BnC08 | bnA4403   | 22.9 | BoC08_18489803_301          | BoC08 | 18489803 |
| BnC08 | bnA0808   | 23.5 | BoC08_18653316_301          | BoC08 | 18653316 |
| BnC08 | BnGMS161  | 37.3 |                             |       |          |
| BnC08 | BnEMS20   | 43.3 | BoC08_27420490_342          | BoC08 | 27420490 |
| BnC08 | BoGMS1200 | 45.9 |                             |       |          |
| BnC08 | BEN235    | 45.9 | BoC08_27486008_243          | BoC08 | 27486008 |
| BnC08 | bnA2853   | 46.2 | BoScaffold000220_330745_301 |       |          |
| BnC08 | bnA5803   | 55.6 | BoC08_33288852_301          | BoC08 | 33288852 |
| BnC08 | bnA4522   | 55.6 | BoC08_33288852_301          | BoC08 | 33288852 |
| BnC08 | bnA4523   | 55.6 | BoC08_33309801_301          | BoC08 | 33309801 |
| BnC08 | bnA4524   | 55.6 | BoC08_33323382_301          | BoC08 | 33323382 |
| BnC08 | bnA5804   | 55.6 | BoC08_33347565_301          | BoC08 | 33347565 |
| BnC08 | bnA4525   | 55.6 | BoC08_33349656_301          | BoC08 | 33349656 |
| BnC08 | BGO185    | 57   | BoC08_33413955_175          | BoC08 | 33413955 |
| BnC08 | bnA4466   | 57.6 | BoC08_33414439_301          | BoC08 | 33414439 |
| BnC08 | bnA5790   | 58.2 | BoC08_33626856_301          | BoC08 | 33626856 |
| BnC08 | bnA4470   | 58.2 | BoC08_33627426_309          | BoC08 | 33627426 |
| BnC08 | bnA0149   | 58.2 | BoC08_33685221_301          | BoC08 | 33685221 |
| BnC08 | bnA4737   | 59.9 | BoC08_34090345_302          | BoC08 | 34090345 |
| BnC08 | bnA5319   | 59.9 | BoC08_34149820_297          | BoC08 | 34149820 |
| BnC08 | bnA4478   | 59.9 | BoC08_34223188_172          | BoC08 | 34223188 |
| BnC08 | bnA4479   | 59.9 | BoC08_34299811_301          | BoC08 | 34299811 |
| BnC08 | bnA4480   | 59.9 | BoC08_34330172_271          | BoC08 | 34330172 |
| BnC08 | bnA4483   | 60.5 | BoC08_34447669_301          | BoC08 | 34447669 |
| BnC08 | bnA4484   | 60.5 | BoC08_34490256_301          | BoC08 | 34490256 |
| BnC08 | bnA5795   | 60.8 | BoC08_34507781_302          | BoC08 | 34507781 |
| BnC08 | bnA4485   | 60.8 | BoC08_34515885_301          | BoC08 | 34515885 |



|       |           |       |                             |       |          |
|-------|-----------|-------|-----------------------------|-------|----------|
| BnC08 | bn4486    | 60.8  | BoC08_34516979_301          | BoC08 | 34516979 |
| BnC08 | BGO183    | 64.7  | BoC08_34682365_236          | BoC08 | 34682365 |
| BnC08 | bn4488    | 68.6  | BoC08_34885790_300          | BoC08 | 34885790 |
| BnC08 | bn4490    | 68.6  | BoC08_34974685_301          | BoC08 | 34974685 |
| BnC08 | bn4496    | 68.6  | BoC08_35193805_301          | BoC08 | 35193805 |
| BnC08 | bn4497    | 68.6  | BoC08_35216428_299          | BoC08 | 35216428 |
| BnC08 | bn4498    | 68.6  | BoC08_35252325_276          | BoC08 | 35252325 |
| BnC08 | bn4499    | 68.6  | BoC08_35278607_303          | BoC08 | 35278607 |
| BnC08 | BEN52     | 68.9  | BoC08_35597022_161          | BoC08 | 35597022 |
| BnC08 | bn40480   | 75.6  | BoC08_36969549_301          | BoC08 | 36969549 |
| BnC08 | BEN82     | 76    | BoC08_37025192_150          | BoC08 | 37025192 |
| BnC08 | bn45810   | 76.8  | BoC08_38521325_301          | BoC08 | 38521325 |
| BnC08 | bn42602   | 76.8  | BrA09_21897067_311          |       |          |
| BnC08 | bn4543    | 76.8  | BoC08_38528116_301          | BoC08 | 38528116 |
| BnC08 | bn4547    | 76.8  | BoC08_38663751_301          | BoC08 | 38663751 |
| BnC08 | bn4551    | 76.8  | BoC08_38792031_300          | BoC08 | 38792031 |
| BnC08 | bn45692   | 76.8  | BrA09_21897067_311          |       |          |
| BnC08 | bn4554    | 76.8  | BoC08_38862591_301          | BoC08 | 38862591 |
| BnC08 | bn40059   | 76.8  | BoC08_38862591_301          | BoC08 | 38862591 |
| BnC08 | bn45179   | 77.4  | BoC08_38982814_301          | BoC08 | 38982814 |
| BnC08 | CB10028   | 77.7  | BoC08_39012255_177          | BoC08 | 39012255 |
| BnC08 | BoGMS1558 | 78.3  |                             |       |          |
| BnC08 | bn45813   | 79.4  | BoC08_39218901_301          | BoC08 | 39218901 |
| BnC08 | bn4558    | 79.4  | BoC08_39223830_309          | BoC08 | 39223830 |
| BnC08 | bn42785   | 79.7  | BrA09_35647627_301          |       |          |
| BnC08 | bn45480   | 79.7  | BoScaffold000330_47398_301  |       |          |
| BnC08 | bn45808   | 79.7  | BoScaffold000330_198207_301 |       |          |
| BnC08 | bn4538    | 79.7  | BoC08_40291476_301          | BoC08 | 40291476 |
| BnC08 | bn45807   | 79.7  | BoC08_40306294_301          | BoC08 | 40306294 |
| BnC08 | bn45720   | 79.7  | BrA09_36111852_301          |       |          |
| BnC08 | bn42782   | 79.7  | BrA09_36016899_303          |       |          |
| BnC08 | bn4537    | 79.7  | BoC08_40327538_301          | BoC08 | 40327538 |
| BnC08 | bn42783   | 79.7  | BrA09_35751967_301          |       |          |
| BnC08 | bn4540    | 79.7  | BoScaffold000330_49205_301  |       |          |
| BnC08 | bn4534    | 79.7  | BoC08_40629883_301          | BoC08 | 40629883 |
| BnC08 | bn4539    | 79.7  | BoScaffold000330_354434_231 |       |          |
| BnC08 | BnEMS860  | 81.1  | BoC08_40829449_328          | BoC08 | 40829449 |
| BnC08 | BEN316    | 83.7  |                             |       |          |
| BnC08 | BoGMS125  | 90.7  | BoC08_40929085_506          | BoC08 | 40929085 |
| BnC08 | BrGMS394  | 94.2  | BrA09_35835741_166          |       |          |
| BnC08 | BrGMS375C | 95.7  | BrA09_36262449_164          |       |          |
| BnC08 | bn45806   | 96.3  | BoC08_40937947_301          | BoC08 | 40937947 |
| BnC08 | bn4531    | 96.3  | BoC08_40937947_301          | BoC08 | 40937947 |
| BnC08 | bn45428   | 98    | BoC08_41331400_301          | BoC08 | 41331400 |
| BnC08 | bn4527    | 98    | BoC08_41383351_301          | BoC08 | 41383351 |
| BnC08 | BoGMS1166 | 98.6  |                             |       |          |
| BnC08 | bn44795   | 102.5 | BoScaffold000330_36569_301  |       |          |

|       |           |       |                    |       |          |
|-------|-----------|-------|--------------------|-------|----------|
| BnC08 | BEN136B   | 104   | BoC08_41173283_131 | BoC08 | 41173283 |
| BnC08 | bna5805   | 115.4 | BoC08_41421132_301 | BoC08 | 41421132 |
| BnC08 | bna4526   | 116   | BoC08_41433239_301 | BoC08 | 41433239 |
| BnC08 | BEN136A   | 116.9 | BoC08_41173283_131 | BoC08 | 41173283 |
| BnC08 | BrGMS375B | 122.1 | BrA09_36262449_164 | BrA09 | 36262449 |
| BnC08 | BrGMS375A | 125.4 | BrA09_36262449_164 | BrA09 | 36262449 |
| BnC08 | bna2772   | 126.8 | BrA09_36860095_301 | BrA09 | 36860095 |
| BnC08 | bna2784   | 127.7 | BrA09_35707655_301 | BrA09 | 35707655 |
| BnC08 | bna2789   | 129.7 | BrA09_35389195_301 | BrA09 | 35389195 |
| BnC08 | bna2790   | 129.7 | BrA09_35321451_301 | BrA09 | 35321451 |
| BnC08 | bna2791   | 130   | BrA09_35278168_284 | BrA09 | 35278168 |
| BnC08 | bna5099   | 130   | BrA09_35278168_284 | BrA09 | 35278168 |
| BnC08 | bna2796   | 133   | BrA09_33398631_301 | BrA09 | 33398631 |
| BnC08 | bna2799   | 135   | BrA09_32229790_301 | BrA09 | 32229790 |
| BnC08 | bna5427   | 135   | BoC08_35949347_304 |       |          |
| BnC08 | bna5723   | 135.3 | BrA09_32177679_301 | BrA09 | 32177679 |
| BnC08 | bna4491   | 135.9 | BoC08_34986249_301 |       |          |
| BnC08 | bna2939   | 136.2 | BrA09_31788228_301 | BrA09 | 31788228 |
| BnC08 | bna4493   | 136.2 | BoC08_35073478_301 |       |          |
| BnC08 | BoGMS1382 | 137.6 |                    |       |          |
| BnC08 | BnEMS14   | 137.9 | BoC08_36424147_266 |       |          |
| BnC08 | BoGMS1308 | 139   |                    |       |          |
| BnC08 | BoGMS586  | 140.2 | BoC08_34092882_250 |       |          |
| BnC08 | BrGMS5    | 143.7 | BrA09_30466050_255 | BrA09 | 30466050 |
| BnC08 | bna5724   | 144.6 | BrA09_30571654_300 | BrA09 | 30571654 |
| BnC08 | bna4521   | 144.6 | BoC08_33259513_301 |       |          |
| BnC09 | bna1478   | 0     | BrA02_23454785_301 |       |          |
| BnC09 | bna5851   | 3.6   | BoC09_171077_274   | BoC09 | 171077   |
| BnC09 | BEN332C   | 4.7   | BoC09_186601_237   | BoC09 | 186601   |
| BnC09 | BGO199B   | 8.6   | BoC09_193617_190   | BoC09 | 193617   |
| BnC09 | BoGMS1072 | 15.7  |                    |       |          |
| BnC09 | BGO199A   | 19.3  | BoC09_193617_190   | BoC09 | 193617   |
| BnC09 | BEN343    | 20.7  | BoC09_30393262_235 |       |          |
| BnC09 | bna5746   | 21.8  | BrA09_696711_301   |       |          |
| BnC09 | bna4581   | 22.9  | BoC09_2014248_302  | BoC09 | 2014248  |
| BnC09 | bna4586   | 22.9  | BoC09_1934744_301  | BoC09 | 1934744  |
| BnC09 | bna4579   | 23.5  | BoC09_2055747_260  | BoC09 | 2055747  |
| BnC09 | bna5960   | 23.5  | BoC09_2063866_301  | BoC09 | 2063866  |
| BnC09 | bna3638   | 23.8  | BoC09_2186157_301  | BoC09 | 2186157  |
| BnC09 | BoGMS1484 | 25.2  |                    |       |          |
| BnC09 | BrGMS725B | 26.3  | BrA09_2302831_166  |       |          |
| BnC09 | BEN55A    | 26.9  | BoC09_2708553_177  | BoC09 | 2708553  |
| BnC09 | FITO135B  | 27.2  |                    |       |          |
| BnC09 | FITO136   | 30.4  |                    |       |          |
| BnC09 | bna4585   | 40    | BoC09_1990112_301  |       |          |
| BnC09 | BnEMS820B | 73.8  |                    |       |          |
| BnC09 | bna4592   | 75.5  | BoC09_5057885_301  | BoC09 | 5057885  |

|       |           |       |                                 |       |          |
|-------|-----------|-------|---------------------------------|-------|----------|
| BnC09 | bn4591    | 75.5  | BoC09_5058499_301               | BoC09 | 5058499  |
| BnC09 | bn4761    | 81.5  | BoC09_6686378_301               | BoC09 | 6686378  |
| BnC09 | BnGMS213A | 81.5  | BrA09_13917079_149              |       |          |
| BnC09 | BGO196    | 83.2  | BoC09_6732672_119               | BoC09 | 6732672  |
| BnC09 | bn40971   | 84.9  | BoC09_7208308_301               | BoC09 | 7208308  |
| BnC09 | bn44601   | 84.9  | BoScaffold000035_P2_283375_259  |       |          |
| BnC09 | bn44602   | 85.2  | BoScaffold000035_P2_669076_301  |       |          |
| BnC09 | bn43857   | 85.5  | BoScaffold000035_P2_1472078_301 |       |          |
| BnC09 | bn41011   | 85.5  | BoC07_13141450_301              |       |          |
| BnC09 | Na10-C01C | 85.5  | BoC09_8400120_250               | BoC09 | 8400120  |
| BnC09 | BEN203    | 87.2  | BoC09_18992253_333              | BoC09 | 18992253 |
| BnC09 | bn44594   | 93.9  | BoC09_23062819_301              | BoC09 | 23062819 |
| BnC09 | bn40875   | 99.2  | BoC09_34857697_301              | BoC09 | 34857697 |
| BnC09 | bn44041   | 108.6 | BoScaffold000161_P1_535291_229  |       |          |
| BnC09 | bn40166   | 116.3 | BrA07_13942212_301              |       |          |
| BnC09 | bn42881   | 119.7 | BoC07_33651629_305              |       |          |
| BnC09 | bn41399   | 122   | BrA02_8955295_301               |       |          |
| BnC09 | bn43506   | 122   | BoScaffold000001_P2_811933_302  |       |          |
| BnC09 | bn43005   | 124   | BrA10_14402659_301              |       |          |
| BnC09 | bn40339   | 126.6 | BrA08_8334365_302               |       |          |
| BnC09 | bn43026   | 130.2 | BrA10_13332063_292              |       |          |
| BnC09 | bn45261   | 132.2 | BrA10_13332063_292              |       |          |
| BnC09 | bn40491   | 133.1 | BoC07_10188434_304              |       |          |
| BnC09 | bn41800   | 134.8 | BrA03_712458_302                |       |          |
| BnC09 | bn41436   | 135.9 | BrA08_14011236_307              |       |          |
| BnC09 | bn44442   | 136.8 | BoC08_30597656_301              |       |          |
| BnC09 | bn44265   | 142.4 | BoC06_2517867_301               |       |          |
| BnC09 | bn42801   | 147   | BrA09_30763855_297              |       |          |
| BnC09 | bn41529   | 148.4 | BrA03_29998397_301              |       |          |
| BnC09 | bn40944   | 149.5 | BoScaffold000269_459624_300     |       |          |
| BnC09 | bn43579   | 149.8 | BoC03_4310209_301               |       |          |
| BnC09 | bn41048   | 149.8 | BoC08_3936744_301               | BoC08 | 3936744  |
| BnC09 | bn40409   | 149.8 | BoC08_4387772_301               | BoC08 | 4387772  |
| BnC09 | bn44216   | 149.8 | BoC08_6008129_301               | BoC08 | 6008129  |
| BnC09 | bn44218   | 149.8 | BoC08_6095312_301               | BoC08 | 6095312  |
| BnC09 | bn40514   | 149.8 | BoC06_39793715_301              |       |          |
| BnC09 | bn40934   | 149.8 |                                 |       |          |
| BnC09 | bn44220   | 149.8 | BoC08_6163945_301               | BoC08 | 6163945  |
| BnC09 | bn40535   | 149.8 | BoC09_20621229_301              |       |          |
| BnC09 | bn44221   | 149.8 | BoC08_6286405_301               | BoC08 | 6286405  |
| BnC09 | bn43599   | 150.1 | BoC03_5270613_301               |       |          |
| BnC09 | bn45849   | 150.7 | BoC09_4095080_301               |       |          |
| BnC09 | bn41945   | 151.6 | BrA01_16571686_301              |       |          |
| BnC09 | bn45399   | 154.2 | BrA07_14137999_301              |       |          |
| BnC09 | bn40582   | 159.5 | BoScaffold000020_P3_180753_297  |       |          |
| BnC09 | bn43521   | 167.3 | BoC01_18780739_301              |       |          |

<sup>a</sup>The method for identification of homologous collinear locus in *B. rapa* and *B. oleracea* is described by Cai *et al.* [29].

<sup>b</sup>The left, middle, and right refers the chromosome or scaffold of the *B. rapa* or *B. oleracea*, the physical position of the homologous locus in *B. rapa* (<http://brassicadb.org/brad/index.php>; chromosome\_v1.5) or *B. oleracea* (<http://www.ocri-genomics.org/bolbase/>; chromosome\_v1.0) chromosome or scaffold, and the matching base pairs of the homologous locus in *B. rapa* or *B. oleracea*, respectively.

<sup>c</sup>The colors of the homologous collinear fragments are same as to the colors of the *B. rapa* and *B. oleracea* chromosomes which described by Cai *et al.* [29].
